# Supplementary material for: Lewis acid-promoted site-selective cyanation of phenols
Source: Royal Society of Chemistry journal article supplement (doi:10.1039/d0ob00737d), 2020-01-01

Supporting Information

**Lewis acid-promoted site-selective cyanation of phenols**

Wu Zhang, Wen Yang\* and Wanxiang Zhao\*

State Key Laboratory of Chemo/Biosensing and Chemometrics, College of Chemistry and Chemical Engineering, Hunan University, Changsha, Hunan 410082, People's Republic of China.

\*Email: zhaowanxiang@hnu.edu.cn; yangwen@hnu.edu.cn

**Table of contents**

|                                                                       |     |
|-----------------------------------------------------------------------|-----|
| 1. General information .....                                          | S1  |
| 2. Preparation of substrates .....                                    | S2  |
| 3. Lewis acid-promoted site-selective cyanation of phenols .....      | S6  |
| 4. Product transformations .....                                      | S16 |
| 5. Reference .....                                                    | S21 |
| 6. Copies of <sup>1</sup> H NMR and <sup>13</sup> C NMR spectra ..... | S25 |

## 1. General information

Unless otherwise noted, all reactions were conducted in oven-dried vials with a magnetic stir bar under nitrogen atmosphere. Solvents obtained commercially were purified under nitrogen using a solvent purification system. Unless otherwise noted, all reagents and catalysts were purchased from commercial suppliers without further purification and used as received.  $^1\text{H}$  NMR and  $^{13}\text{C}$  NMR spectra were recorded on Bruker 400 MHz at 20 °C. Chemical shifts ( $\delta$ ) are given in parts per million (ppm) referenced to the appropriate solvent peak or 0.0 ppm for tetramethylsilane ( $^1\text{H}$  NMR:  $\text{CDCl}_3$  at 7.26 ppm,  $\text{DMSO-}d_6$  at 2.50 ppm.  $^{13}\text{C}$  NMR:  $\text{CDCl}_3$  at 77.00 ppm,  $\text{DMSO-}d_6$  at 39.52 ppm). The data are reported as follows: chemical shift (ppm), multiplicity (s = singlet, d = doublet, dd = doublet of doublet, t = triplet, m = multiplet, br = broad), coupling constant  $J$  (Hz) and integration. Flash chromatography was performed with EM Science silica gel 60 (200-300 mesh). Analytical thin layer chromatography (TLC) was performed using silica gel 60 F254 plates. Compounds were visualized with ultraviolet fluorescence. High resolution mass spectra were recorded on a Bruker Maxis System. IR spectra were collected on a Spectrum BX FTIR from Perkin-Elmer and reported in unit of  $\text{cm}^{-1}$ . Melting points were measured on an automatic melting points instrument hanon MP430 at ambient pressure.

## 2. Preparation of substrates

[1,1'-biphenyl]-3-ol (**1q**),<sup>1</sup> [1,1'-biphenyl]-3,3'-diol (**1u**)<sup>2</sup> and 3-hydroxy-1,3,5(10)-estratriene (**1z**)<sup>3</sup> were prepared according to known procedure. The data are all in accordance with the literature.

### Synthesis of 3-(but-2-yn-1-yloxy) phenol (**1k**)

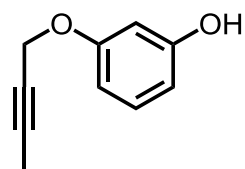

To a suspension of resorcinol (550.6 mg, 5.0 mmol) and potassium carbonate (1.38 g, 10.0 mmol) in acetone (20 mL) was added dropwise 1-bromo-2-butyne (864.5 mg, 6.5 mmol) dropwise at room temperature, and the resulting mixture was refluxed for 5 h. Upon completed, the reaction mixture was concentrated, acidified with 2 M aq. HCl and then extracted with ethyl acetate (15 mL x 3) for three times. The combined organic layers were washed with water (15 mL) and brine (15 mL), dried over Na<sub>2</sub>SO<sub>4</sub>, filtered, and concentrated in *vacuo*. The residue was purified by column chromatography on silica gel (petroleum ether-ethyl acetate as eluent) to obtain desire product **1k** in 45% yield (365.0 mg) as yellow oil. **R<sub>f</sub>** = 0.45 (PE/EA = 5/1). **<sup>1</sup>H NMR (400 MHz, CDCl<sub>3</sub>)** δ 7.12 (t, *J* = 7.9 Hz, 1H), 6.55 (d, *J* = 8.3 Hz, 1H), 6.53-6.45 (m, 2H), 6.18 (br s, 1H), 4.60 (s, 2H), 1.83 (s, 3H) ppm. **<sup>13</sup>C NMR (100 MHz, CDCl<sub>3</sub>)** δ 158.9, 156.5, 130.1, 108.5, 107.2, 102.5, 84.0, 73.8, 56.5, 3.5 ppm. **HRMS (ESI<sup>+</sup>)**: Calcd for C<sub>10</sub>H<sub>9</sub>O<sub>2</sub> [M-H]<sup>-</sup>: 161.0603; Found: 161.0609. **IR (neat, cm<sup>-1</sup>)**: 3449, 2921, 2868, 2231, 1597, 1490, 1460, 1369, 1147, 1024, 765.

### Synthesis of 2, 3-dihydro-6-benzofuranol (**1o**)<sup>4</sup>

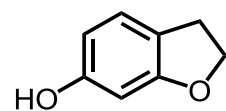

A suspension of 6-hydroxy-1-benzofuran-3-one (750.7 mg, 5.0 mmol) in 3 mL hydrazine hydrate, 29 mL diethyleneglycol and NaOH (2.18 g, 54.5 mmol) was heated to 120 °C. After stirring at this temperature for 1 h, the temperature was increased to 190 °C. After stirring for additional 8 h, the mixture was cooled to room temperature, acidified with 2 M aq. HCl, and then extracted with ethyl acetate (30 mL x 3) for three times. The combined organic layers were washed with water (50 mL) and brine (50 mL), dried over Na<sub>2</sub>SO<sub>4</sub>, filtered, and

concentrated in *vacuo*. The residue was purified by flash column chromatography on silica gel (petroleum ether-ethyl acetate as eluent) to obtain desire product **1o** in 37% yield (252.0 mg) as colorless solid. **m.p.** 59-60 °C. **R<sub>f</sub>** = 0.47 (PE/EA = 5:1). **<sup>1</sup>H NMR** (400 MHz, CDCl<sub>3</sub>) δ 7.00 (d, *J* = 8.4 Hz, 1H), 6.46 (br s, 1H), 6.39-6.32 (m, 2H), 4.57 (t, *J* = 8.4 Hz, 2H), 3.11 (t, *J* = 8.6 Hz, 2H) ppm. **<sup>13</sup>C NMR** (100 MHz, CDCl<sub>3</sub>) δ 160.7, 155.9, 125.0, 118.6, 107.3, 97.6, 72.0, 28.8 ppm. **HRMS (ESI<sup>+</sup>)**: Calcd for C<sub>8</sub>H<sub>7</sub>O<sub>2</sub> [M-H]<sup>-</sup>: 135.0446; Found: 135.0453. **IR (neat, cm<sup>-1</sup>)**: 3372, 2966, 1621, 1608, 1499, 1460, 1182, 1136, 1092, 987, 833.

### Synthesis of [1,1'-biphenyl]-3-ol derivatives

General procedure A<sup>1</sup>

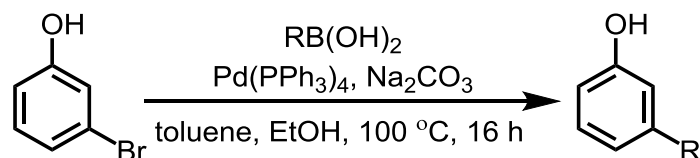

A solution of arylboronic acid (5.5 mmol) in 15 mL ethanol was added to a mixture of 3-bromophenol (865.0 mg, 5.0 mmol), Pd (PPh<sub>3</sub>)<sub>4</sub> (462.2 mg, 8 mol %) and Na<sub>2</sub>CO<sub>3</sub> (2.33 g, 22.0 mmol) in toluene (30 mL) and H<sub>2</sub>O (16 mL) at room temperature under N<sub>2</sub> atmosphere. The mixture was stirred at 100 °C for 16 h. Upon completed, the mixture was concentrated, acidified with 2 M aq. HCl, and then extracted with ethyl acetate (15 mL x 3) for three times. The combined organic layers were washed with water (15 mL) and brine (15 mL), dried over Na<sub>2</sub>SO<sub>4</sub>, filtered, and concentrated in *vacuo*. The residue was purified by flash column chromatography on silica gel (petroleum ether/ethyl acetate as eluent = 10/1) to the corresponding products.

### Synthesis of 2'-Methoxy-[1,1'-biphenyl]-3-ol (**1r**)<sup>5</sup>

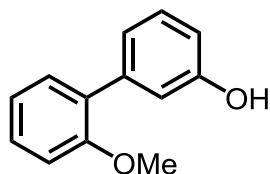

The title compound **1r** was synthesized from 3-bromophenol (865.0 mg, 5.0 mmol) and (2-methoxyphenyl)boronic acid (836.0 mg, 5.5 mmol) according to the general procedure A and isolated as colorless oil with 83% yield (831.0 mg). **R<sub>f</sub>** = 0.45 (PE/EA = 5/1). **<sup>1</sup>H NMR** (400 MHz, CDCl<sub>3</sub>) δ 7.43-7.29 (m, 3H), 7.17 (d, *J* =

7.5 Hz, 1H), 7.13-7.01 (m, 3H), 6.86 (d,  $J = 7.9$  Hz, 1H), 6.05 (br s, 1H), 3.82 (s, 3H) ppm.  $^{13}\text{C}$  NMR (100 MHz,  $\text{CDCl}_3$ )  $\delta$  156.2, 155.0, 139.9, 130.7, 130.2, 129.1, 128.7, 121.9, 120.8, 116.5, 114.0, 111.4, 55.5 ppm.

#### Synthesis of 3'-methoxy-[1,1'-biphenyl]-3-ol (**1s**)<sup>6</sup>

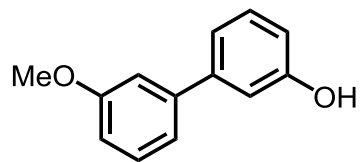

The title compound **1s** was synthesized from 3-bromophenol (865.0 mg, 5.0 mmol) and (3-methoxyphenyl)boronic acid (836.0 mg, 5.5 mmol) according to the general procedure A and isolated as colorless oil with 81% yield (811.0 mg).  $R_f = 0.46$  (PE/EA = 5/1).  $^1\text{H}$  NMR (400 MHz,  $\text{CDCl}_3$ )  $\delta$  7.42-7.31 (m, 2H), 7.25-7.13 (m, 4H), 6.97 (d,  $J = 8.1$  Hz, 1H), 6.92 (d,  $J = 7.9$  Hz, 1H), 6.45 (br s, 1H), 3.89 (s, 3H) ppm.  $^{13}\text{C}$  NMR (100 MHz,  $\text{CDCl}_3$ )  $\delta$  159.5, 155.7, 142.6, 142.1, 130.0, 129.7, 119.7, 119.6, 114.4, 114.1, 112.9, 112.7, 55.2 ppm.

#### Synthesis of 3',5'-dimethyl-[1,1'-biphenyl]-3-ol (**1t**)<sup>7</sup>

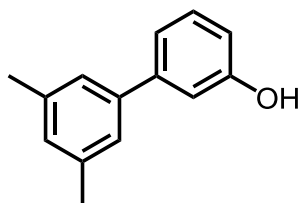

The title compound **1t** was synthesized from 3-bromophenol (865.0 mg, 5.0 mmol) and (3,5-dimethylphenyl)boronic acid (825.0 mg, 5.5 mmol) according to the general procedure A and isolated as light orange oil with 65% yield (645.0 mg).  $R_f = 0.48$  (PE/EA = 5/1).  $^1\text{H}$  NMR (400 MHz,  $\text{CDCl}_3$ )  $\delta$  7.28 (t,  $J = 7.7$  Hz, 1H), 7.18 (s, 3H), 7.08 (s, 1H), 7.00 (s, 1H), 6.84 (d,  $J = 7.9$  Hz, 1H), 6.17 (s, 1H), 2.36 (s, 6H) ppm.  $^{13}\text{C}$  NMR (100 MHz,  $\text{CDCl}_3$ )  $\delta$  155.5, 143.1, 140.6, 138.1, 129.8, 129.0, 124.9, 119.8, 114.11, 114.08, 21.3 ppm.

#### Synthesis of 4'-fluoro-[1,1'-biphenyl]-3-ol (**1v**)<sup>7</sup>

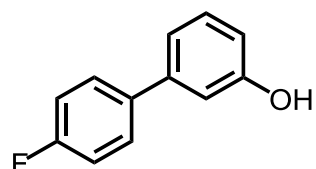

The title compound **1v** was synthesized from 3-bromophenol (865.0 mg, 5.0 mmol) and (4-fluorophenyl)boronic acid (770 mg, 5.5 mmol) according to the general procedure A and isolated as a colorless solid with 75% yield (706.0 mg).  $m.p.$  76-77 °C.  $R_f = 0.41$  (PE/EA = 5/1).  $^1\text{H}$  NMR (400 MHz,  $\text{CDCl}_3$ )  $\delta$  7.53-7.46 (m, 2H), 7.32 (t,  $J = 7.9$  Hz, 1H), 7.17-7.07 (m, 3H), 7.05 (s, 1H), 6.89-6.83 (m, 1H), 5.66 (br s, 1H) ppm.  $^{13}\text{C}$  NMR (100 MHz,  $\text{CDCl}_3$ )  $\delta$

162.5 (d,  $J = 246.5$  Hz), 155.6, 142.0, 136.7 (d,  $J = 3.2$  Hz), 130.1, 128.6 (d,  $J = 8.1$  Hz), 119.7, 115.5 (d,  $J = 21.5$  Hz), 114.2, 114.0 ppm.

#### Synthesis of 4'-Chloro-[1,1'-biphenyl]-3-ol (**1w**)<sup>7</sup>

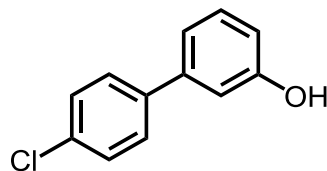

The title compound **1w** was synthesized from 3-bromophenol (865.0 mg, 5.0 mmol) and (4-chlorophenyl)boronic acid (860.2 mg, 5.5 mmol) according to the general procedure A and isolated as a colorless solid with 79% yield (809.0 mg). **m.p.** 75-76 °C. **R<sub>f</sub>** = **0.39** (PE/EA = 5/1). **<sup>1</sup>H NMR (400 MHz, CDCl<sub>3</sub>)**  $\delta$  7.45 (d,  $J = 7.8$  Hz, 2H), 7.38 (d,  $J = 7.8$  Hz, 2H), 7.32 (t,  $J = 7.7$  Hz, 1H), 7.15 (d,  $J = 7.6$  Hz, 1H), 7.06 (s, 1H), 6.90 (d,  $J = 7.9$  Hz, 1H), 6.18 (br s, 1H) ppm. **<sup>13</sup>C NMR (101 MHz, CDCl<sub>3</sub>)**  $\delta$  155.5, 141.6, 138.9, 133.5, 130.2, 128.8, 128.2, 119.6, 114.5, 113.9 ppm.

#### Synthesis of 3-(furan-3-yl) phenol (**1x**)<sup>8</sup>

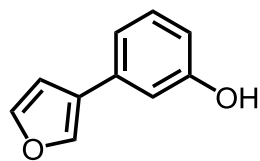

The title compound **1x** was synthesized from 3-bromophenol (865.0 mg, 5.0 mmol) and furan-3-ylboronic acid (615.5 mg, 5.5 mmol) according to the general procedure A and isolated as a colorless solid with 73% yield (585.0 mg). **m.p.** 55-56 °C. **R<sub>f</sub>** = 0.38 (PE/EA = 5/1). **<sup>1</sup>H NMR (400 MHz, CDCl<sub>3</sub>)**  $\delta$  7.73 (s, 1H), 7.50 (s, 1H), 7.28 (t,  $J = 7.8$  Hz, 1H), 7.12 (d,  $J = 7.6$  Hz, 1H), 7.01 (s, 1H), 6.79 (d,  $J = 8.0$  Hz, 1H), 6.69 (s, 1H), 5.43 (s, 1H) ppm. **<sup>13</sup>C NMR (100 MHz, CDCl<sub>3</sub>)**  $\delta$  155.7, 143.6, 138.7, 134.1, 130.1, 126.0, 118.5, 114.0, 112.8, 108.8 ppm.

#### Synthesis of 3-(thiophen-3-yl) phenol (**1y**)<sup>9</sup>

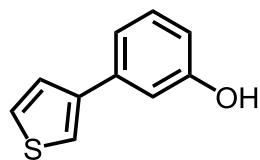

The title compound **1y** was synthesized from 3-bromophenol (865.0 mg, 5.0 mmol) and thiophen-3-ylboronic acid (704.0 mg, 5.5 mmol) according to the general procedure A and isolated as a colorless solid with 70% yield (617.0 mg). **m.p.** 97-98 °C. **R<sub>f</sub>** = 0.37 (PE/EA = 5/1). **<sup>1</sup>H NMR (400 MHz, CDCl<sub>3</sub>)**  $\delta$  7.49 (s, 1H), 7.46-7.40 (m, 2H), 7.34 (t,  $J = 7.6$  Hz, 1H), 7.25 (d,  $J = 7.7$  Hz, 1H), 7.14 (s, 1H), 6.84 (d,  $J = 7.9$  Hz, 1H), 5.16 (s, 1H) ppm. **<sup>13</sup>C NMR (100 MHz, CDCl<sub>3</sub>)**  $\delta$  155.8, 141.8, 137.5, 130.0, 126.3, 126.2, 120.6, 119.1,

114.1, 113.4 ppm.

### Synthesis of 17-Methoxy-1,3,5(10)-estratrien-3-ol (**1aa**)<sup>10</sup>

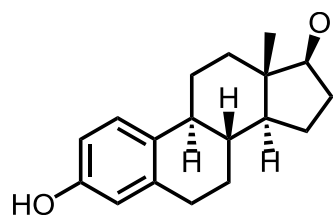

3,17 $\beta$ -Dimethoxyestra-1,3,5(10)-triene was prepared according to literature procedure using estradiol as the starting material.<sup>11</sup> Adopting a modified method of demethylation invented by our group, in a nitrogen-filled glovebox, to an oven-dried vial was charged with HPPPh<sub>2</sub> (558.6 mg, 3.0 mmol), and <sup>t</sup>BuOK (336.6 mg, 3.0 mmol) in DMF (2.0 M) was added 3,17 $\beta$ -dimethoxyestra-1,3,5(10)-triene (450.6 mg, 1.5 mmol). The vial was sealed with a teflon-lined cap, removed out from the glovebox and heated at 80 °C for 14 h. After cooling down, the mixture was quenched with water (5 mL), acidified with 2 M HCl, and then extracted with ethyl acetate (15 mL x 3) for three times. The combined organic layers were washed with water (15 mL) and brine (15 mL), dried over anhydrous Na<sub>2</sub>SO<sub>4</sub>, filtered, and concentrated in *vacuo*. The residue was purified by flash column chromatography on silica gel (petroleum ether/ethyl acetate = 5/1) to afford the desire product **1aa** in 82% yield (353.0 mg) as a colorless solid. **m.p.** 246-247 °C. **R<sub>f</sub>** = 0.32 (PE/EA = 4/1). **<sup>1</sup>H NMR (400 MHz, DMSO-*d*<sub>6</sub>)**  $\delta$  8.98 (s, 1H), 7.02 (d, *J* = 8.3 Hz, 1H), 6.50 (d, *J* = 8.0 Hz, 1H), 6.43 (s, 1H), 3.25 (s, 3H), 2.76-2.62 (m, 2H), 2.27-2.15 (m, 1H), 2.12-1.84 (m, 3H), 1.81-1.69 (m, 1H), 1.67-1.54 (m, 1H), 1.45-1.08 (m, 8H), 0.70 (s, 3H) ppm. **<sup>13</sup>C NMR (100 MHz, DMSO-*d*<sub>6</sub>)**  $\delta$  154.9, 137.1, 130.3, 126.0, 114.9, 112.8, 89.9, 57.1, 49.6, 43.4, 42.8, 38.4, 37.5, 29.1, 27.3, 26.9, 26.1, 22.7, 11.6 ppm.

### 3. Lewis acid-promoted site-selective cyanation of phenols

General procedure B

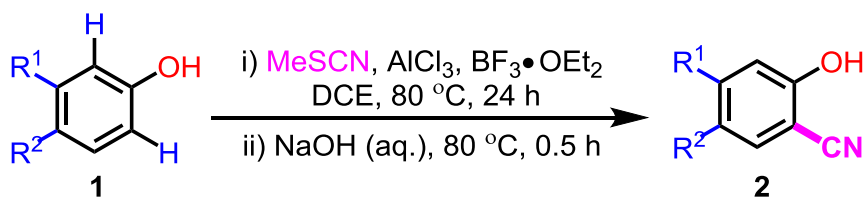

To a solution of phenol **1** (1.0 mmol), CH<sub>3</sub>SCN (0.14 mL, 146.2 mg, 2.0 mmol), and AlCl<sub>3</sub> (133.3 mg, 1.0 mmol) in DCE (1 mL) was added BF<sub>3</sub>•OEt<sub>2</sub> (0.25 mL, 283.8 mg, 2.0 mmol). The reaction mixture was stirred at 80 °C for 24 h. Upon completion, 4 M aq. NaOH (3.3 mL) was added and the mixture was refluxed for 0.5 h. After cooling, the organic layer was separated and the aqueous layer was washed with CH<sub>2</sub>Cl<sub>2</sub>. The aqueous layer was acidified with 6 M HCl (3 mL), and then extracted with ethyl acetate (15 mL x 3). The combined organic layers were washed with water, dried over Na<sub>2</sub>SO<sub>4</sub>, filtered and concentrated in *vacuo*. The residue was purified by flash column chromatography on silica gel (eluent: dichloromethane/ethyl acetate = 20/1 to 10/1, unless otherwise noted) to afford the 2-hydroxy-4-substituted benzonitrile **2a-2aa**.

#### Synthesis of 3-hydroxy-5,6,7,8-tetrahydronaphthalene-2-carbonitrile (**2a**)

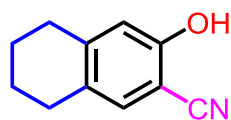

The title compound **2a** was synthesized from 5, 6, 7, 8-tetrahydronaphthalen-2-ol **1a** according to the general procedure B and isolated as a colorless solid in 87% yield (150.7 mg). **m.p.** 157-158 °C. **R<sub>f</sub>** = 0.48 (CH<sub>2</sub>Cl<sub>2</sub>/EA = 10/1). **<sup>1</sup>H NMR (400 MHz, DMSO-*d*<sub>6</sub>)** δ 10.59 (s, 1H), 7.23 (s, 1H), 6.67 (s, 1H), 2.72-2.55 (m, 4H), 1.72-1.60 (m, 4H) ppm. **<sup>13</sup>C NMR (100 MHz, DMSO-*d*<sub>6</sub>)** δ 157.4, 144.3, 132.9, 128.3, 117.4, 115.8, 96.4, 29.2, 27.5, 22.5, 22.1 ppm. **HRMS (ESI<sup>+</sup>):** Calcd for C<sub>11</sub>H<sub>10</sub>NO [M-H]<sup>-</sup>: 172.0762; Found: 172.0769. **IR (neat, cm<sup>-1</sup>):** 3294, 2917, 2230, 1618, 1584, 1437, 1348, 1285, 1198, 865.

#### Synthesis of 6-hydroxy-indene-5-carbonitrile (**2b**)

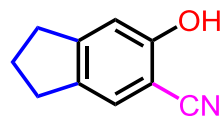

The title compound **2b** was synthesized from inden-5-ol **1b** according to the general procedure B and isolated as a colorless solid in 92% yield (146.5 mg). **m.p.** 175-176 °C. **R<sub>f</sub>** = 0.47 (CH<sub>2</sub>Cl<sub>2</sub>/EA = 10/1). **<sup>1</sup>H NMR (400 MHz, DMSO-*d*<sub>6</sub>)** δ 10.61 (s, 1H), 7.21 (s, 1H), 6.83 (s, 1H), 2.76 (t, *J* = 7.3 Hz, 2H), 2.68 (t, *J* = 7.2 Hz, 2H), 1.97-1.86 (m, 2H) ppm. **<sup>13</sup>C NMR (100 MHz, DMSO-*d*<sub>6</sub>)** δ 159.3, 151.9, 134.9, 127.7, 117.8, 112.1, 96.5, 33.0, 31.1, 25.3 ppm. **HRMS (ESI<sup>+</sup>):** Calcd for C<sub>10</sub>H<sub>8</sub>NO [M-H]<sup>-</sup>: 158.0606; Found: 158.0612. **IR (neat, cm<sup>-1</sup>):** 3260, 2921, 2231, 1615, 1588, 1491, 1429, 1276, 1182, 874.



### Synthesis of 2-hydroxy-4-methylbenzonitrile (**2c**)<sup>12</sup>

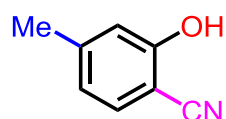

The title compound **2c** was synthesized from *m*-cresol **1c** according to the general procedure B and isolated as a colorless solid in 93% yield (123.9 mg). The data of **2c** was in accordance with the literature. **m.p.** 108-109 °C. **R<sub>f</sub>** = 0.47 (CH<sub>2</sub>Cl<sub>2</sub>/EA = 10/1). **<sup>1</sup>H NMR (400 MHz, DMSO-*d*<sub>6</sub>)** δ 10.91 (s, 1H), 7.44 (d, *J* = 7.8 Hz, 1H), 6.80 (s, 1H), 6.73 (d, *J* = 7.8 Hz, 1H), 2.27 (s, 3H) ppm. **<sup>13</sup>C NMR (100 MHz, DMSO-*d*<sub>6</sub>)** δ 160.1, 145.5, 132.9, 120.7, 117.3, 116.5, 96.0, 21.5 ppm.

### Synthesis of 2-hydroxy-4, 5-dimethylbenzonitrile (**2d**)

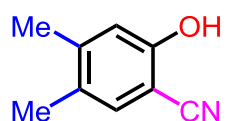

The title compound **2d** was synthesized from 3,4-dimethylphenol **1d** according to the general procedure B and isolated as a colorless solid in 96% yield (141.3 mg). **m.p.** 198-199 °C. **R<sub>f</sub>** = 0.46 (CH<sub>2</sub>Cl<sub>2</sub>/EA = 10/1). **<sup>1</sup>H NMR (400 MHz, DMSO-*d*<sub>6</sub>)** δ 10.59 (s, 1H), 7.21 (s, 1H), 6.77 (s, 1H), 2.14 (s, 3H), 2.06 (s, 3H) ppm. **<sup>13</sup>C NMR (100 MHz, DMSO-*d*<sub>6</sub>)** δ 158.3, 144.2, 132.8, 127.8, 117.5, 117.1, 95.9, 20.0, 18.0 ppm. **HRMS (ESI<sup>+</sup>):** Calcd for C<sub>9</sub>H<sub>8</sub>NO [M-H]<sup>-</sup>: 146.0606; Found: 146.0612. **IR (neat, cm<sup>-1</sup>):** 3252, 2943, 2229, 1619, 1586, 1499, 1407, 1296, 1200, 873, 669.

### Synthesis of 4-*tert*-butyl-2-hydroxybenzonitrile (**2e**)<sup>13</sup>

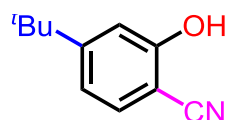

The title compound **2e** was synthesized from 3-(*tert*-butyl) phenol **1e** according to the general procedure B and isolated as a colorless solid in 88% yield (154.2 mg). **m.p.** 130-131 °C. **R<sub>f</sub>** = 0.43 (CH<sub>2</sub>Cl<sub>2</sub>/EA = 10/1). **<sup>1</sup>H NMR (400 MHz, DMSO-*d*<sub>6</sub>)** δ 10.88 (s, 1H), 7.49 (d, *J* = 8.0 Hz, 1H), 7.00 (s, 1H), 6.96 (d, *J* = 8.2 Hz, 1H), 1.23 (s, 9H) ppm. **<sup>13</sup>C NMR (100 MHz, DMSO-*d*<sub>6</sub>)** δ 160.1, 158.2, 132.7, 117.21, 117.18, 112.9, 95.9, 34.9, 30.6 ppm.

### Synthesis of 2-hydroxy-5-isopropyl-4-methylbenzonitrile (**2f**)

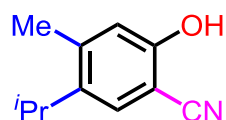

The title compound **2f** was synthesized from 4-isopropyl-3-methylphenol **1f** according to the general procedure B and isolated as a colorless solid in 91% yield (159.5 mg). **m.p.** 118-119 °C. **R<sub>f</sub>** = 0.46 (CH<sub>2</sub>Cl<sub>2</sub>/EA = 10/1). **<sup>1</sup>H NMR (400 MHz, DMSO-*d*<sub>6</sub>)** δ 10.66 (br s, 1H), 7.35 (s,

1H), 6.77 (s, 1H), 3.20-2.92 (m, 1H), 2.25 (s, 3H), 1.11 (d,  $J = 6.7$  Hz, 6H) ppm.  $^{13}\text{C}$  NMR (100 MHz, DMSO- $d_6$ )  $\delta$  157.7, 142.8, 138.2, 129.0, 117.51, 117.46, 96.4, 28.0, 23.0, 19.4 ppm. HRMS (ESI<sup>+</sup>): Calcd for C<sub>11</sub>H<sub>12</sub>NO [M-H]<sup>-</sup>: 174.0919; Found: 174.0925. IR (neat, cm<sup>-1</sup>): 3303, 2960, 2870, 2229, 1614, 1587, 1503, 1379, 1289, 1146, 864.

#### Synthesis of 2-hydroxy-4-methoxybenzonitrile (**2g**)<sup>14</sup>

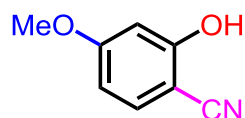

The title compound **2g** was synthesized from 3-methoxyphenol **1g** according to the general procedure B and isolated as a colorless solid in 95% yield (141.7 mg). **m.p.** 168-169 °C. **R<sub>f</sub>** = 0.45 (CH<sub>2</sub>Cl<sub>2</sub>/EA = 10/1).  $^1\text{H}$  NMR (400 MHz, DMSO- $d_6$ )  $\delta$  11.05 (s, 1H), 7.49 (d,  $J = 8.5$  Hz, 1H), 6.54-6.48 (m, 2H), 3.76 (s, 3H) ppm.  $^{13}\text{C}$  NMR (100 MHz, DMSO- $d_6$ )  $\delta$  164.1, 161.9, 134.4, 117.4, 106.7, 101.1, 91.2, 55.5 ppm.

#### Synthesis of 2-hydroxy-4,5-dimethoxybenzonitrile (**2h**)

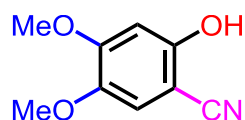

The title compound **2h** was synthesized from 3,4-dimethoxyphenol **1h** according to the general procedure B and isolated as a colorless solid in 93% yield (166.7 mg). **m.p.** 134-135 °C. **R<sub>f</sub>** = 0.45 (CH<sub>2</sub>Cl<sub>2</sub>/EA = 10/1).  $^1\text{H}$  NMR (400 MHz, DMSO- $d_6$ )  $\delta$  10.58 (s, 1H), 7.05 (s, 1H), 6.55 (s, 1H), 3.77 (s, 3H), 3.69 (s, 3H) ppm.  $^{13}\text{C}$  NMR (100 MHz, DMSO- $d_6$ )  $\delta$  156.3, 154.1, 142.1, 117.6, 114.2, 100.3, 88.4, 56.2, 55.6 ppm. HRMS (ESI<sup>+</sup>): Calcd for C<sub>9</sub>H<sub>8</sub>NO<sub>3</sub> [M-H]<sup>-</sup>: 178.0504; Found: 178.0511. IR (neat, cm<sup>-1</sup>): 3247, 2981, 2834, 2222, 1613, 1525, 1469, 1212, 1116, 990, 852.

#### Synthesis of 2, 4-dihydroxybenzonitrile (**2i**)<sup>15</sup>

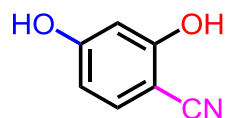

The title compound **2i** was synthesized from resorcinol **1i** according to the general procedure B and isolated as a colorless solid in 81% yield (109.4 mg). **m.p.** 183-184 °C. **R<sub>f</sub>** = 0.35 (CH<sub>2</sub>Cl<sub>2</sub>/EA = 5/1).  $^1\text{H}$  NMR (400 MHz, DMSO- $d_6$ )  $\delta$  10.76 (br s, 1H), 10.36 (br s, 1H), 7.34 (d,  $J = 8.5$  Hz, 1H), 6.42 (s, 1H), 6.32 (d,  $J = 8.5$  Hz, 1H) ppm.  $^{13}\text{C}$  NMR (100 MHz, DMSO- $d_6$ )  $\delta$  163.0, 162.0, 134.5, 118.0, 108.4, 102.6, 89.7 ppm.

#### Synthesis of 2-hydroxy-4-pentadecylbenzonitrile (**2j**)

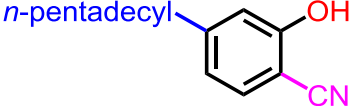
 The title compound **2j** was synthesized from 3-pentadecylphenol **1j** according to the general procedure B and isolated as a colorless solid in 90% yield (296.6 mg). **m.p.** 72-73 °C. **R<sub>f</sub>** = 0.44 (CH<sub>2</sub>Cl<sub>2</sub>/EA = 10/1). **<sup>1</sup>H NMR (400 MHz, CDCl<sub>3</sub>)** δ 7.38 (d, *J* = 7.8 Hz, 1H), 6.83-6.75 (m, 2H), 2.58 (t, *J* = 7.6 Hz, 2H), 1.66-1.51 (m, 2H), 1.31-1.21 (m, 24H), 0.88 (t, *J* = 6.3 Hz, 3H) ppm. **<sup>13</sup>C NMR (100 MHz, CDCl<sub>3</sub>)** δ 158.6, 151.2, 132.5, 121.3, 116.8, 116.4, 96.5, 36.1, 31.9, 30.7, 29.72-29.57 (m, 6C), 29.5, 29.4, 29.3, 29.2, 22.7, 14.1 ppm. **HRMS (ESI<sup>+</sup>)**: Calcd for C<sub>22</sub>H<sub>34</sub>NO [M-H]<sup>-</sup>: 328.2640; Found: 328.2647. **IR (neat, cm<sup>-1</sup>)**: 3272, 2916, 2853, 2229, 1615, 1586, 1471, 1440, 1311, 875, 718.

#### Synthesis of 4-(but-2-yn-1-yloxy)-2-hydroxybenzonitrile (**2k**)

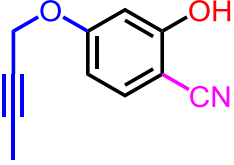
 The title compound **2k** was synthesized from **1k** according to the general procedure B and isolated as a colorless solid in 55% yield (103.0 mg). **m.p.** 119-120 °C. **R<sub>f</sub>** = 0.40 (CH<sub>2</sub>Cl<sub>2</sub>/EA = 10/1). **<sup>1</sup>H NMR (400 MHz, DMSO-*d*<sub>6</sub>)** δ 11.10 (s, 1H), 7.51 (d, *J* = 8.4 Hz, 1H), 6.58-6.51 (m, 2H), 4.76 (s, 2H), 1.83 (s, 3H) ppm. **<sup>13</sup>C NMR (100 MHz, DMSO-*d*<sub>6</sub>)** δ 162.2, 161.7, 134.3, 117.3, 107.3, 102.0, 91.7, 84.3, 74.0, 56.3, 3.2 ppm. **HRMS (ESI<sup>+</sup>)**: Calcd for C<sub>11</sub>H<sub>8</sub>NO<sub>2</sub> [M-H]<sup>-</sup>: 186.0555; Found: 186.0562. **IR (neat, cm<sup>-1</sup>)**: 3235, 2924, 2854, 2225, 1612, 1513, 1491, 1439, 1182, 1014, 837.

#### Synthesis of 4-fluoro-2-hydroxybenzonitrile (**2l**)

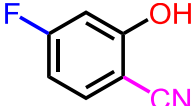
 According to the modified literature procedure for 8 h,<sup>16</sup> the reaction was carried out with 3-fluorophenol **1l** (112.1 mg, 1 mmol), CH<sub>3</sub>SCN (82 uL, 87.7 mg, 1.2 mmol), AlCl<sub>3</sub> (133.3 mg, 1 mmol) and BCl<sub>3</sub> (1.2 mL, 1.2 mmol, 1.0 M in dichloromethane). The product **2l** was obtained as a colorless solid in 92% yield (126.1 mg). **m.p.** 114-115 °C. **R<sub>f</sub>** = 0.35 (CH<sub>2</sub>Cl<sub>2</sub>/EA = 10/1). **<sup>1</sup>H NMR (400 MHz, DMSO-*d*<sub>6</sub>)** δ 11.67 (br s, 1H), 7.67 (t, *J* = 7.5 Hz, 1H), 6.82-6.73 (m, 2H) ppm. **<sup>13</sup>C NMR (100 MHz, DMSO-*d*<sub>6</sub>)** δ 165.5 (d, *J* = 252.5 Hz), 162.4 (d, *J* = 12.6 Hz), 135.6 (d, *J* = 11.7 Hz), 116.4, 107.5 (d, *J* = 23.2 Hz), 103.5 (d, *J* = 24.6 Hz), 96.0 (d, *J* = 2.7 Hz) ppm. **HRMS (ESI<sup>+</sup>)**: Calcd for C<sub>7</sub>H<sub>3</sub>FNO [M-H]<sup>-</sup>: 136.0199;

Found: 136.0205. **IR (neat, cm<sup>-1</sup>):** 3276, 2233, 1606, 1598, 1514, 1446, 1366, 1284, 1101, 980, 856.

#### Synthesis of 4-chloro-2-hydroxybenzonitrile (**2m**)

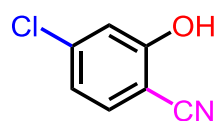

According to the modified literature procedure for 16 h,<sup>16</sup> the reaction was carried out with 3-chlorophenol **1m** (128.6 mg, 1 mmol), CH<sub>3</sub>SCN (82 uL, 1.2 mmol), AlCl<sub>3</sub> (133.3 mg, 1 mmol) and BCl<sub>3</sub> (1.2 mL, 1.2 mmol, 1.0 M in dichloromethane). The product **2m** was obtained as a colorless solid in 84% yield (129.0 mg). **m.p.** 159-160 °C. **R<sub>f</sub>** = 0.33 (CH<sub>2</sub>Cl<sub>2</sub>/EA = 10/1). **<sup>1</sup>H NMR (400 MHz, DMSO-*d*<sub>6</sub>)** δ 11.56 (br s, 1H), 7.60 (d, *J* = 8.4 Hz, 1H), 7.00 (s, 1H), 6.95 (d, *J* = 8.4 Hz, 1H) ppm. **<sup>13</sup>C NMR (100 MHz, DMSO-*d*<sub>6</sub>)** δ 161.0, 139.0, 134.6, 119.9, 116.2, 116.1, 98.2 ppm. **HRMS (ESI<sup>+</sup>):** Calcd for C<sub>7</sub>H<sub>3</sub>ClNO [M-H]<sup>-</sup>: 151.9903; Found: 151.9910. **IR (neat, cm<sup>-1</sup>):** 3159, 2242, 1601, 1592, 1499, 1427, 1259, 1086, 917, 855.

#### Synthesis of 4-bromo-2-hydroxybenzonitrile (**2n**)

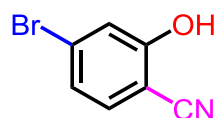

According to the modified literature procedure for 20 h,<sup>16</sup> the reaction was carried out with 3-bromophenol **1n** (173 mg, 1 mmol), CH<sub>3</sub>SCN (82 uL, 1.2 mmol), AlCl<sub>3</sub> (133.3 mg, 1 mmol) and BCl<sub>3</sub> (1.2 mL, 1.2 mmol, 1.0 M in dichloromethane). The product **2n** was obtained as a colorless solid in 76% yield (150.5 mg). **m.p.** 162-163 °C. **R<sub>f</sub>** = 0.32 (CH<sub>2</sub>Cl<sub>2</sub>/EA = 10/1). **<sup>1</sup>H NMR (400 MHz, DMSO-*d*<sub>6</sub>)** δ 11.57 (s, 1H), 7.53 (d, *J* = 8.3 Hz, 1H), 7.17 (s, 1H), 7.09 (d, *J* = 8.4 Hz, 1H) ppm. **<sup>13</sup>C NMR (100 MHz, DMSO-*d*<sub>6</sub>)** δ 160.9, 134.7, 127.8, 122.7, 119.0, 116.3, 98.5 ppm. **HRMS (ESI<sup>+</sup>):** Calcd for C<sub>7</sub>H<sub>3</sub>BrNO [M-H]<sup>-</sup>: 195.9398; Found: 195.9405. **IR (neat, cm<sup>-1</sup>):** 3146, 2241, 1631, 1594, 1493, 1422, 1256, 1075, 896, 854.

#### Synthesis of 6-hydroxy-2,3-dihydrobenzofuran-5-carbonitrile (**2o**)

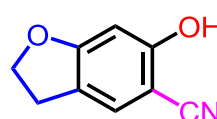

The title compound **2o** was synthesized from 6-hydroxy-2,3-dihydrobenzofuran **1o** according to the general procedure B and isolated as a colorless solid in 87% yield (140.2 mg). **m.p.** 200-201 °C. **R<sub>f</sub>** = 0.45 (CH<sub>2</sub>Cl<sub>2</sub>/EA = 10/1). **<sup>1</sup>H NMR (400 MHz, DMSO-*d*<sub>6</sub>)** δ 10.83

(s, 1H), 7.29 (s, 1H), 6.35 (s, 1H), 4.55 (t,  $J = 8.6$  Hz, 2H), 3.04 (t,  $J = 8.6$  Hz, 2H) ppm.  $^{13}\text{C}$  NMR (100 MHz, DMSO- $d_6$ )  $\delta$  164.9, 161.8, 128.6, 119.5, 118.0, 97.2, 90.3, 72.8, 27.7 ppm. HRMS (ESI $^+$ ): Calcd for  $\text{C}_9\text{H}_6\text{NO}_2$  [M-H] $^-$ : 160.0399; Found: 160.0405. IR (neat,  $\text{cm}^{-1}$ ): 3248, 2956, 2224, 1626, 1606, 1492, 1451, 1314, 1192, 1079, 835.

#### Synthesis of 6-hydroxy-benzo [1, 3] dioxole-5-carbonitrile (2p)<sup>17</sup>

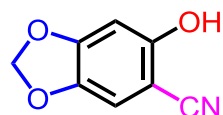

The title compound **2p** was synthesized from sesamol **1p** according to the general procedure B and isolated as a colorless solid in 56% yield (91.4 mg). **m.p.** 235-236 °C. **R<sub>f</sub>** = 0.43 ( $\text{CH}_2\text{Cl}_2/\text{EA} = 10/1$ ).  $^1\text{H}$  NMR (400 MHz, DMSO- $d_6$ )  $\delta$  10.81 (s, 1H), 7.09 (s, 1H), 6.55 (s, 1H), 6.04 (s, 2H) ppm.  $^{13}\text{C}$  NMR (100 MHz, DMSO- $d_6$ )  $\delta$  157.9, 152.4, 140.2, 117.4, 109.9, 102.3, 97.8, 89.2 ppm.

#### Synthesis of 3-hydroxy-[1,1'-biphenyl]-4-carbonitrile (2q)

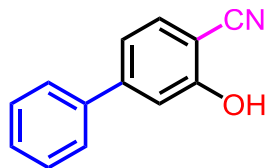

The title compound **2q** was synthesized from **1q** according to the general procedure B and isolated as a colorless solid in 72% yield (140.5 mg). **m.p.** 180-181 °C. **R<sub>f</sub>** = 0.41 ( $\text{CH}_2\text{Cl}_2/\text{EA} = 10/1$ ).  $^1\text{H}$  NMR (400 MHz, DMSO- $d_6$ )  $\delta$  11.25 (s, 1H), 7.66 (d,  $J = 8.0$  Hz, 1H), 7.61 (d,  $J = 7.2$  Hz, 2H), 7.52-7.38 (m, 3H), 7.24 (s, 1H), 7.20 (d,  $J = 7.9$  Hz, 1H) ppm.  $^{13}\text{C}$  NMR (100 MHz, DMSO- $d_6$ )  $\delta$  160.6, 146.4, 138.7, 133.8, 129.2, 128.7, 126.9, 118.2, 117.1, 114.0, 97.9 ppm. HRMS (ESI $^+$ ): Calcd for  $\text{C}_{13}\text{H}_8\text{NO}$  [M-H] $^-$ : 194.0606; Found: 194.0613. IR (neat,  $\text{cm}^{-1}$ ): 3267, 2231, 1611, 1574, 1490, 1417, 1315, 1246, 874, 756.

#### Synthesis of 3-hydroxy-2'-methoxy-[1,1'-biphenyl]-4-carbonitrile (2r)

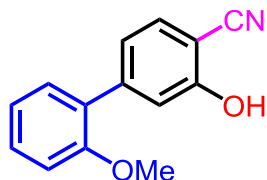

The title compound **2r** was synthesized from **1r** according to the general procedure B and isolated as a colorless solid in 81% yield (182.5 mg). **m.p.** 144-145 °C. **R<sub>f</sub>** = 0.43 ( $\text{CH}_2\text{Cl}_2/\text{EA} = 10/1$ ).  $^1\text{H}$  NMR (400 MHz, DMSO- $d_6$ )  $\delta$  11.10 (s, 1H), 7.60 (d,  $J = 8.0$  Hz, 1H), 7.37 (t,  $J = 7.7$  Hz, 1H), 7.27 (d,  $J = 7.4$  Hz, 1H), 7.17 (s, 1H), 7.11 (d,  $J = 8.3$  Hz, 1H), 7.03 (t,  $J = 8.1$  Hz, 2H), 3.77 (s, 3H) ppm.  $^{13}\text{C}$  NMR (100 MHz,

**DMSO-*d*<sub>6</sub>**)  $\delta$  159.8, 156.1, 144.6, 132.7, 130.2, 130.0, 128.3, 121.0, 120.8, 117.2, 116.9, 112.0, 97.3, 55.6 ppm. **HRMS (ESI<sup>+</sup>)**: Calcd for C<sub>14</sub>H<sub>10</sub>NO<sub>2</sub> [M-H]<sup>-</sup>: 224.0712; Found: 224.0718. **IR (neat, cm<sup>-1</sup>)**: 3264, 2938, 2228, 1612, 1585, 1486, 1415, 1244, 1115, 877, 754.

#### Synthesis of 3-hydroxy-3'-methoxy-[1,1'-biphenyl]-4-carbonitrile (**2s**)

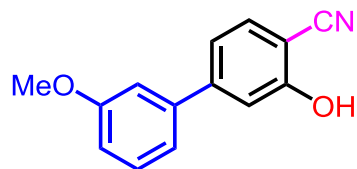

The title compound **2s** was synthesized from **1s** according to the general procedure B and isolated as a colorless solid in 80% yield (180.2 mg). **m.p.** 142-143 °C. **R<sub>f</sub>** = 0.43 (CH<sub>2</sub>Cl<sub>2</sub>/EA = 10/1). **<sup>1</sup>H NMR (400 MHz, DMSO-*d*<sub>6</sub>)**  $\delta$  11.23 (s, 1H), 7.66 (d, *J* = 7.9 Hz, 1H), 7.40 (t, *J* = 7.9 Hz, 1H), 7.26-7.11 (m, 4H), 7.00 (d, *J* = 8.1 Hz, 1H), 3.81 (s, 3H) ppm. **<sup>13</sup>C NMR (100 MHz, DMSO-*d*<sub>6</sub>)**  $\delta$  160.5, 159.8, 146.3, 140.2, 133.7, 130.3, 119.2, 118.4, 117.1, 114.3, 114.2, 112.4, 98.0, 55.2 ppm. **HRMS (ESI<sup>+</sup>)**: Calcd for C<sub>14</sub>H<sub>10</sub>NO<sub>2</sub> [M-H]<sup>-</sup>: 224.0712; Found: 224.0718. **IR (neat, cm<sup>-1</sup>)**: 3259, 2940, 2228, 1609, 1574, 1485, 1283, 1035, 817, 780.

#### Synthesis of 3-hydroxy-3',5'-dimethyl-[1,1'-biphenyl]-4-carbonitrile (**2t**)

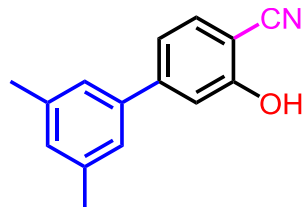

The title compound **2t** was synthesized from **1t** according to the general procedure B and isolated as a colorless solid in 83% yield (185.3 mg). **m.p.** 195-196 °C. **R<sub>f</sub>** = 0.45 (CH<sub>2</sub>Cl<sub>2</sub>/EA = 10/1). **<sup>1</sup>H NMR (400 MHz, DMSO-*d*<sub>6</sub>)**  $\delta$  11.15 (s, 1H), 7.59 (d, *J* = 8.1 Hz, 1H), 7.22 (s, 1H), 7.17 (s, 2H), 7.12 (d, *J* = 8.1 Hz, 1H), 6.99 (s, 1H), 2.29 (s, 6H) ppm. **<sup>13</sup>C NMR (100 MHz, DMSO-*d*<sub>6</sub>)**  $\delta$  160.5, 146.7, 138.7, 138.2, 133.5, 130.1, 124.7, 118.2, 117.1, 114.0, 97.7, 21.0 ppm. **HRMS (ESI<sup>+</sup>)**: Calcd for C<sub>15</sub>H<sub>12</sub>NO [M-H]<sup>-</sup>: 222.0919; Found: 222.0926. **IR (neat, cm<sup>-1</sup>)**: 3250, 2917, 2230, 1612, 1580, 1483, 1443, 1404, 1244, 847, 816.

#### Synthesis of 3,3'-dihydroxy-[1,1'-biphenyl]-4-carbonitrile (**2u**)

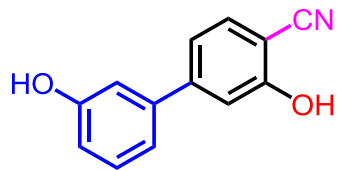

The title compound **2u** was synthesized from **1u** according to the general procedure B and isolated as a colorless solid in 61% yield (128.8 mg). **m.p.** 222-223 °C. **R<sub>f</sub>** = 0.31 (CH<sub>2</sub>Cl<sub>2</sub>/EA = 5/1). **<sup>1</sup>H NMR (400 MHz, DMSO-*d*<sub>6</sub>)**  $\delta$  11.21 (s, 1H), 9.69

(s, 1H), 7.65 (d,  $J = 7.9$  Hz, 1H), 7.28 (t,  $J = 7.7$  Hz, 1H), 7.22-7.11 (m, 2H), 7.03 (d,  $J = 7.6$  Hz, 1H), 6.98 (s, 1H), 6.83 (d,  $J = 8.0$  Hz, 1H) ppm.  $^{13}\text{C}$  NMR (100 MHz, DMSO- $d_6$ )  $\delta$  160.5, 158.0, 146.6, 140.1, 133.7, 130.3, 118.1, 117.6, 117.1, 115.8, 113.9, 113.6, 97.8 ppm. HRMS (ESI<sup>+</sup>): Calcd for C<sub>13</sub>H<sub>8</sub>NO<sub>2</sub> [M-H]<sup>-</sup>: 210.0555; Found: 210.0562. IR (neat, cm<sup>-1</sup>): 3235, 2237, 1610, 1579, 1485, 1421, 1288, 1244, 844, 781.

#### Synthesis of 4'-fluoro-3-hydroxy-[1,1'-biphenyl]-4-carbonitrile (2v)

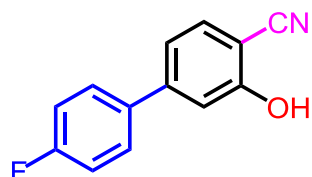

The title compound **2v** was synthesized from **1v** according to the general procedure B and isolated as a colorless solid in 81% yield (172.7 mg). **m.p.** 262-263 °C. **R<sub>f</sub>** = 0.37 (CH<sub>2</sub>Cl<sub>2</sub>/EA = 10:1).  $^1\text{H}$  NMR (400 MHz, DMSO- $d_6$ )  $\delta$  11.26 (s, 1H), 7.67 (d,  $J = 6.2$  Hz, 3H), 7.32 (t,  $J = 8.4$  Hz, 2H), 7.23-7.16 (m, 2H) ppm.  $^{13}\text{C}$  NMR (100 MHz, DMSO- $d_6$ )  $\delta$  162.5 (d,  $J = 246.0$  Hz), 160.5, 145.3, 135.2 (d,  $J = 3.0$  Hz), 133.8, 129.1 (d,  $J = 8.4$  Hz), 118.2, 117.0, 116.1 (d,  $J = 21.6$  Hz), 114.0, 97.9 ppm. HRMS (ESI<sup>+</sup>): Calcd for C<sub>13</sub>H<sub>7</sub>FNO [M-H]<sup>-</sup>: 212.0512; Found: 212.0518. IR (neat, cm<sup>-1</sup>): 3229, 2237, 1613, 1579, 1497, 1439, 1403, 1224, 1161, 842, 817.

#### Synthesis of 4'-chloro-3-hydroxy-[1,1'-biphenyl]-4-carbonitrile (2w)

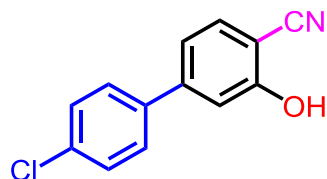

The title compound **2w** was synthesized from **1w** according to the general procedure B and isolated as a colorless solid in 74% yield (170.0 mg). **m.p.** 279-280 °C. **R<sub>f</sub>** = 0.34 (CH<sub>2</sub>Cl<sub>2</sub>/EA = 10/1).  $^1\text{H}$  NMR (400 MHz, DMSO- $d_6$ )  $\delta$  11.28 (s, 1H), 7.68-7.58 (m, 3H), 7.50 (d,  $J = 8.1$  Hz, 2H), 7.21 (s, 1H), 7.17 (d,  $J = 8.0$  Hz, 1H) ppm.  $^{13}\text{C}$  NMR (100 MHz, DMSO- $d_6$ )  $\delta$  160.6, 145.0, 137.5, 133.8, 133.7, 129.1, 128.7, 118.1, 117.0, 114.0, 98.3 ppm. HRMS (ESI<sup>+</sup>): Calcd for C<sub>13</sub>H<sub>7</sub>ClNO [M-H]<sup>-</sup>: 228.0216; Found: 228.0223. IR (neat, cm<sup>-1</sup>): 3229, 2234, 1609, 1587, 1486, 1438, 1281, 1091, 1012, 874, 804.

#### Synthesis of 4-(furan-3-yl)-2-hydroxybenzonitrile (2x)

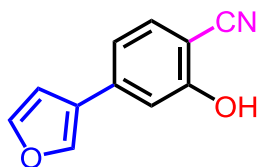

The title compound **2x** was synthesized from **1x** according to the general procedure B and isolated as a colorless solid in 51% yield (94.5 mg). **m.p.** 190-191 °C. **R<sub>f</sub>** = 0.37 (CH<sub>2</sub>Cl<sub>2</sub>/EA = 10/1). **<sup>1</sup>H NMR (400 MHz, DMSO-*d*<sub>6</sub>)** δ 11.13 (s, 1H), 8.25 (s, 1H), 7.78 (s, 1H), 7.60 (d, *J* = 8.1 Hz, 1H), 7.19 (d, *J* = 8.1 Hz, 1H), 7.15 (s, 1H), 6.89 (s, 1H) ppm. **<sup>13</sup>C NMR (100 MHz, DMSO-*d*<sub>6</sub>)** δ 160.5, 144.8, 141.0, 138.2, 133.7, 124.8, 117.2, 117.1, 112.6, 108.6, 97.2 ppm. **HRMS (ESI<sup>+</sup>):** Calcd for C<sub>11</sub>H<sub>6</sub>NO<sub>2</sub> [M-H]<sup>-</sup>: 184.0399; Found: 184.0405. **IR (neat, cm<sup>-1</sup>):** 3198, 2233, 1616, 1568, 1430, 1369, 1227, 1163, 1057, 862, 781.

#### Synthesis of 2-hydroxy-4-(thiophen-3-yl)benzonitrile (**2y**)

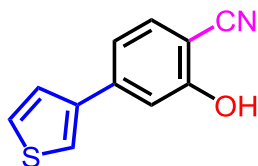

The title compound **2y** was synthesized from **1y** according to the general procedure B and isolated as a colorless solid in 86% yield (173.1 mg). **m.p.** 202-203 °C. **R<sub>f</sub>** = 0.38 (CH<sub>2</sub>Cl<sub>2</sub>/EA = 10/1). **<sup>1</sup>H NMR (400 MHz, DMSO-*d*<sub>6</sub>)** δ 11.18 (s, 1H), 7.89 (s, 1H), 7.65-7.56 (m, 2H), 7.47 (d, *J* = 4.7 Hz, 1H), 7.29 (s, 1H), 7.24 (d, *J* = 8.1 Hz, 1H) ppm. **<sup>13</sup>C NMR (100 MHz, DMSO-*d*<sub>6</sub>)** δ 160.6, 141.0, 140.0, 133.7, 127.7, 126.0, 123.5, 117.7, 117.2, 113.2, 97.5 ppm. **HRMS (ESI<sup>+</sup>):** Calcd for C<sub>11</sub>H<sub>6</sub>NOS [M-H]<sup>-</sup>: 200.0170; Found: 200.0177. **IR (neat, cm<sup>-1</sup>):** 3205, 2232, 1610, 1581, 1443, 1378, 1230, 1120, 948, 851, 782.

#### Synthesis of 3-hydroxy-estra-1,3,5(10)-triene-2-carbonitrile (**2z**)

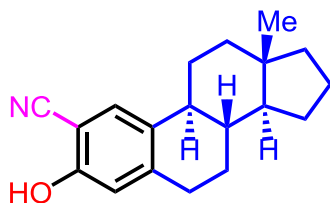

The title compound **2z** was synthesized from **1z** according to the general procedure B and isolated as a colorless solid in 74% yield (208.2 mg) using petroleum ether-ethyl acetate (v/v, from 4/1 to 2/1) as an eluent. **m.p.** 207-208 °C. **R<sub>f</sub>** = 0.47 (PE/EA = 2/1). **<sup>1</sup>H NMR (400 MHz, DMSO-*d*<sub>6</sub>)** δ 10.59 (s, 1H), 7.32 (s, 1H), 6.66 (s, 1H), 2.78-2.69 (m, 2H), 2.25-2.14 (m, 1H), 2.06-1.93 (m, 1H), 1.81-1.71 (m, 2H), 1.70-1.48 (m, 3H), 1.46-1.07 (m, 7H), 1.06-0.94 (m, 1H), 0.64 (s, 3H) ppm. **<sup>13</sup>C NMR (100 MHz, DMSO-*d*<sub>6</sub>)** δ 157.6, 144.0, 132.0, 129.5, 117.5, 115.7, 96.3, 52.9, 42.9, 40.5, 40.0, 38.3, 38.1, 29.4, 27.1, 26.0, 24.7, 20.2, 17.2



ppm. **HRMS (ESI<sup>+</sup>)**: Calcd for C<sub>19</sub>H<sub>22</sub>NO [M-H]<sup>-</sup>: 280.1701; Found: 280.1708. **IR (neat, cm<sup>-1</sup>)**: 3262, 2930, 2228, 1613, 1585, 1503, 1451, 1419, 1282, 1185, 890.

#### Synthesis of 17-Methoxy-3-hydroxy-estra-1,3,5(10)-triene-2-carbonitrile (**2aa**)

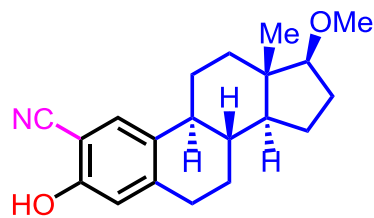

The title compound **2aa** was synthesized from **1aa** according to the general procedure B and isolated as a colorless solid in 73% yield (227.3 mg) using petroleum ether-ethyl acetate (v/v, from 4/1 to 2/1) as an eluent. **m.p.** 246-247 °C. **R<sub>f</sub>** = 0.49 (PE/EA = 2/1). **<sup>1</sup>H NMR (400 MHz, DMSO-*d*<sub>6</sub>)** δ 10.63 (s, 1H), 7.31 (s, 1H), 6.65 (s, 1H), 3.22 (s, 3H), 3.20-3.14 (m, 1H), 2.76-2.66 (m, 2H), 2.22-2.10 (m, 1H), 2.01-1.81 (m, 3H), 1.76-1.63 (m, 1H), 1.61-1.46 (m, 1H), 1.39-1.11 (m, 6H), 1.06-0.96 (m, 1H), 0.62 (s, 3H) ppm. **<sup>13</sup>C NMR (100 MHz, DMSO-*d*<sub>6</sub>)** δ 157.7, 144.1, 131.8, 129.5, 117.5, 115.8, 96.4, 89.8, 57.2, 49.5, 42.8, 42.7, 37.8, 37.3, 29.3, 27.3, 26.3, 25.7, 22.6, 11.4 ppm. **HRMS (ESI<sup>+</sup>)**: Calcd for C<sub>20</sub>H<sub>24</sub>NO<sub>2</sub> [M-H]<sup>-</sup>: 310.1807; Found: 310.1814. **IR (neat, cm<sup>-1</sup>)**: 3436, 2931, 2232, 1612, 1552, 1502, 1421, 1288, 1096, 966.

#### 4. Product transformations

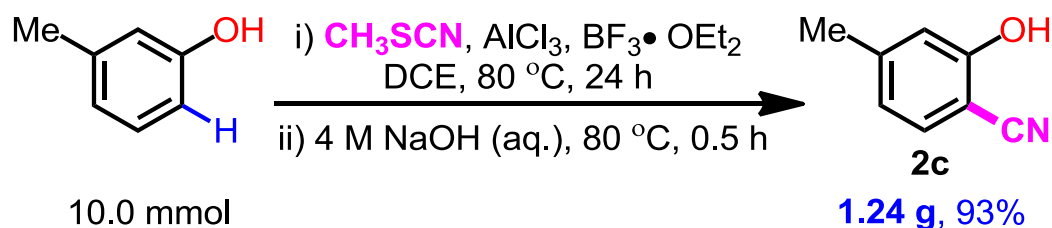

To a solution of *meta*-methyl phenol **1c** (10 mmol, 1.08 g), CH<sub>3</sub>SCN (1.35 mL, 1.46 g, 20 mmol) and AlCl<sub>3</sub> (1.33 g, 10 mmol) in DCE (10 mL) was added BF<sub>3</sub>·OEt<sub>2</sub> (2.5 mL, 2.84 g, 20 mmol). The reaction mixture was stirred at 80 °C for 24 h. Upon completed, 4 M aq. NaOH (33 mL) was added and refluxed for 0.5 h. After cooled, the organic layers were separated and the aqueous layer was washed with CH<sub>2</sub>Cl<sub>2</sub>. The aqueous layer was acidified with 6.0 M HCl (30 mL), and then extracted with ethyl acetate (30 x 3). The combined organic layers were washed with water, dried over Na<sub>2</sub>SO<sub>4</sub>, filtered and concentrated in *vacuo*. The residue was purified by flash chromatography

on silica gel (dichloromethane-ethyl acetate as eluent) to the desired cyanated product **2c** (1.24 g, 93%).

#### Synthesis of (*S*)-2-(4-(*tert*-butyl)-4,5-dihydrooxazol-2-yl)-5-methylphenol (**3a**)<sup>18</sup>

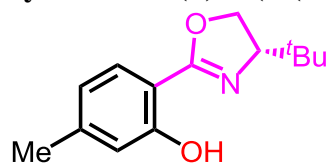

An oven-dried vial equipped with a magnetic stir bar was charged with **2c** (66.6 mg, 0.5 mmol). The vial was then moved into a N<sub>2</sub>-filled glovebox. (*S*)-2-amino-3,3-dimethylbutan-1-ol (117.2 mg, 1.0 mmol), ZnCl<sub>2</sub> (68.2 mg, 0.5 mmol), and PhCl (2 mL) were added to the vial. The vial was capped, and the resulting reaction mixture was stirred at 131 °C for 3 days. The reaction was quenched with water, and extracted with ethyl acetate (15 mL x 3). The combined organic layers were dried over Na<sub>2</sub>SO<sub>4</sub>, filtered, and concentrated in *vacuo*. The residue was purified by flash column chromatography on silica gel to afford (*S*)-2-(4-(*tert*-butyl)-4,5-dihydrooxazol-2-yl)-5-methylphenol **3a** in 88% yield (102.7 mg) as colorless oil. **R<sub>f</sub>** = 0.51 (PE/EA = 5/1). **<sup>1</sup>H NMR (400 MHz, CDCl<sub>3</sub>)** δ 12.36 (br s, 1H), 7.51 (d, *J* = 8.0 Hz, 1H), 6.84 (s, 1H), 6.69 (d, *J* = 8.0 Hz, 1H), 4.36-4.29 (m, 1H), 4.20 (t, *J* = 8.2 Hz, 1H), 4.13-4.06 (m, 1H), 2.35 (s, 3H), 0.94 (s, 9H).ppm. **<sup>13</sup>C NMR (100 MHz, CDCl<sub>3</sub>)** δ 165.0, 159.9, 144.1, 127.7, 119.6, 116.9, 108.0, 74.8, 67.9, 33.7, 25.7, 21.7 ppm. **HRMS (ESI<sup>+</sup>)**: Calcd for C<sub>14</sub>H<sub>20</sub>NO<sub>2</sub> [M+H]<sup>+</sup>: 234.1499; Found: 234.1489. **IR (neat, cm<sup>-1</sup>)**: 2959, 2870, 1650, 1578, 1480, 1359, 1263, 1147, 1079, 965, 790.

#### Synthesis of (3-amino-6-methylbenzofuran-2-yl) (phenyl) methanone (**3b**)<sup>19</sup>

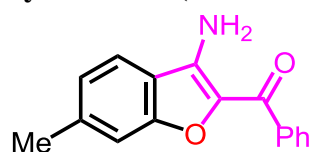

To a suspension of **2c** (66.6 mg, 0.5 mmol) and potassium carbonate (138.2 mg, 1.0 mmol) in acetone (1 mL) was added *α*-bromoacetophenone (99.6 mg, 0.5 mmol). The resulting reaction mixture was refluxed for 8 h. After cooled to room temperature, the reaction mixture was diluted with ethyl acetate (15 mL), and washed with water and brine, respectively. The organic layer was dried over anhydrous Na<sub>2</sub>SO<sub>4</sub>, filtered, and concentrated in *vacuo*. The residue was purified by flash column chromatography on silica gel (petroleum ether/ethyl acetate = 5/1) to afford **3b** in 90% yield (113.1 mg) as a yellow solid. **m.p.** 155-156 °C. **R<sub>f</sub>** = 0.41 (PE/EA = 3/1). **<sup>1</sup>H NMR (400 MHz,**

**CDCl<sub>3</sub>**)  $\delta$  8.28 (d,  $J = 6.5$  Hz, 2H), 7.63-7.49 (m, 4H), 7.26 (s, 1H), 7.07 (d,  $J = 7.9$  Hz, 1H), 6.20 (br s, 2H), 2.50 (s, 3H) ppm. **<sup>13</sup>C NMR (100 MHz, CDCl<sub>3</sub>)**  $\delta$  182.5, 155.0, 142.6, 140.9, 137.8, 135.0, 131.6, 129.1, 128.1, 123.9, 119.7, 118.3, 112.5, 22.0 ppm. **HRMS (ESI<sup>+</sup>):** Calcd for C<sub>16</sub>H<sub>14</sub>NO<sub>2</sub> [M+H]<sup>+</sup>: 252.1018; Found: 252.1019. **IR (neat, cm<sup>-1</sup>):** 3410, 3293, 1612, 1589, 1513, 1479, 1407, 1355, 1310, 1181, 808.

#### Synthesis of 2-methoxy-4-methylbenzonitrile (**3c**)<sup>20</sup>

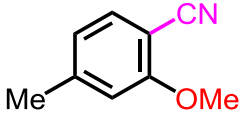 The title compound **3c** was synthesized by the known literature procedure.<sup>21</sup> A suspension of 2-hydroxy-4-methylbenzonitrile **2c** (666.0 mg, 5.0 mmol) and potassium carbonate (1.38 g, 10.0 mmol) in DMF (15 mL) was stirred for 30 min at room temperature, and then CH<sub>3</sub>I (0.62 mL, 10.0 mmol) was added dropwise. After stirring at 60 °C for 5 h, the reaction was quenched with saturated aqueous ammonium chloride (20 mL), and extracted with ethyl acetate (10 mL x 3). The combined organic layers were dried over anhydrous Na<sub>2</sub>SO<sub>4</sub>, filtered, and concentrated under *vacuo*. The residue was purified by flash column chromatography on silica gel (petroleum ether/ethyl acetate = 10/1) to give the desired product **3c** in 94% yield (692.0 mg) as a colorless solid. **m.p.** 72-73 °C. **R<sub>f</sub>** = 0.53 (PE/EA = 5/1). **<sup>1</sup>H NMR (400 MHz, CDCl<sub>3</sub>)**  $\delta$  7.42 (d,  $J = 7.8$  Hz, 1H), 6.80 (d,  $J = 7.8$  Hz, 1H), 6.76 (s, 1H), 3.90 (s, 3H), 2.40 (s, 3H) ppm. **<sup>13</sup>C NMR (100 MHz, CDCl<sub>3</sub>)**  $\delta$  161.2, 145.7, 133.4, 121.6, 116.8, 112.0, 98.8, 55.8, 22.2 ppm.

#### Synthesis of 4-methyl-2-(((1*R*, 2*S*, 4*S*)-1, 3, 3-trimethylbicyclo [2.2.1] heptan-2-yl)oxy) benzonitrile (**3d**)

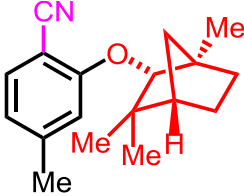 The title compound **3d** was synthesized by the known literature procedure.<sup>22</sup> An oven-dried vial equipped with a magnetic stir bar was charged with **3c** (73.6 mg, 0.5 mmol), and the vial was then moved into a N<sub>2</sub>-filled glovebox. <sup>t</sup>BuOK (112.2 mg, 1.0 mmol), (+)-fenchol (1.0 mmol), and 1,4-dioxane (0.5 mL) were added to the vial. The vial was capped, and the reaction mixture was stirred at 80 °C for 16 h. The mixture was diluted with Et<sub>2</sub>O (3 mL), filtered through a plug of silica gel, and washed with THF. The filtrate was concentrated in *vacuo* and purified by flash column chromatography on silica gel (petroleum ether/ethyl acetate = 10/1) to provide **3d** as

colorless oil in 69% yield (92.9 mg).  $R_f = 0.50$  (PE/EA = 5/1).  $^1\text{H NMR}$  (400 MHz,  $\text{CDCl}_3$ )  $\delta$  7.37 (d,  $J = 8.1$  Hz, 1H), 6.76-6.71 (m, 2H), 3.98 (s, 1H), 2.36 (s, 3H), 2.21-2.11 (m, 1H), 1.84-1.72 (m, 2H), 1.60 (d,  $J = 10.3$  Hz, 1H), 1.54-1.45 (m, 1H), 1.29-1.21 (m, 2H), 1.19 (s, 3H), 1.11 (s, 3H), 0.86 (s, 3H).  $^{13}\text{C NMR}$  (100 MHz,  $\text{CDCl}_3$ )  $\delta$  161.8, 145.2, 133.4, 121.2, 117.0, 114.1, 99.5, 91.0, 49.7, 49.0, 41.4, 40.1, 30.5, 26.3, 25.8, 22.3, 20.4, 19.8 ppm. HRMS (ESI<sup>+</sup>): Calcd for  $\text{C}_{18}\text{H}_{24}\text{NO}$  [M+H]<sup>+</sup>: 270.1853; Found: 270.1852. IR (neat,  $\text{cm}^{-1}$ ): 2957, 2873, 2225, 1606, 1568, 1499, 1462, 1286, 1161, 1044, 808.

### Synthesis of 2-methoxy-4-methylbenzoic acid (**3e**)<sup>23</sup>

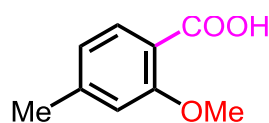

The title compound **3e** was synthesized by the known literature procedure.<sup>23</sup> A Schlenk tube equipped with a magnetic stir bar was charged with **3c** (73.6 mg, 0.5 mmol). EtOH (4 mL) and KOH (4 mL, 34% aqueous solution) were added *via* syringe. The resulting reaction mixture was heated to 80 °C and stirred overnight. The reaction mixture was quenched and acidified with HCl (2 M), and then extracted with ethyl acetate (15 mL x 3). The combined organic layers were washed with brine, dried over  $\text{Na}_2\text{SO}_4$ , filtered, and concentrated in *vacuo*. The residue was purified by flash column chromatography on silica gel (petroleum ether/ethyl acetate = 5/1) to afford **3e** as a colorless solid in 85% yield (70.6 mg). **m.p.** 102-103 °C.  $R_f = 0.50$  (PE/EA = 2.5/1).  $^1\text{H NMR}$  (400 MHz,  $\text{DMSO}-d_6$ )  $\delta$  12.40 (br s, 1H), 7.57 (d,  $J = 7.8$  Hz, 1H), 6.93 (s, 1H), 6.79 (d,  $J = 7.8$  Hz, 1H), 3.79 (s, 3H), 2.32 (s, 3H) ppm.  $^{13}\text{C NMR}$  (100 MHz,  $\text{DMSO}-d_6$ )  $\delta$  167.1, 158.5, 143.8, 131.1, 120.7, 118.0, 113.1, 55.7, 21.4 ppm.

### Synthesis of 2-methoxy-4-methylbenzamide (**3f**)

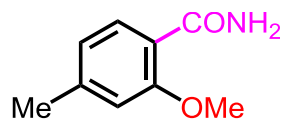

The title compound **3f** was synthesized *via* the hydrolysis of 2-methoxy-4-methylbenzamide **3c** by a modified literature procedure.<sup>24</sup> To a solution of **3c** (73.6 mg, 0.5 mmol) in  $t\text{BuOH}$  (10 mL) was added solid KOH (420.8 mg, 7.5 mmol) in a  $\text{N}_2$ -filled glovebox. The reaction was heated to 60 °C and stirred overnight. Upon completion, the mixture was diluted with ethyl acetate (20 mL), and washed with water and brine, respectively. The organic layer

was dried over anhydrous Na<sub>2</sub>SO<sub>4</sub>, filtered, and concentrated in *vacuo*. The residue was purified by flash column chromatography on silica gel (petroleum ether/ethyl acetate = 1/1) to afford **3f** as a colorless solid in 81% yield (66.9 mg). **m.p.** 143-144 °C. **R<sub>f</sub>** = 0.35 (PE/EA = 1/1). **<sup>1</sup>H NMR (400 MHz, DMSO-*d*<sub>6</sub>)** δ 7.75 (d, *J* = 7.9 Hz, 1H), 7.60 (br s, 1H), 7.48 (br s, 1H), 6.95 (s, 1H), 6.83 (d, *J* = 7.9 Hz, 1H), 3.87 (s, 3H), 2.33 (s, 3H) ppm. **<sup>13</sup>C NMR (100 MHz, DMSO-*d*<sub>6</sub>)** δ 166.1, 157.3, 143.0, 131.0, 121.2, 119.5, 112.5, 55.8, 21.2 ppm. **HRMS (ESI<sup>+</sup>)**: Calcd for C<sub>9</sub>H<sub>12</sub>NO<sub>2</sub> [M+H]<sup>+</sup>: 166.0863; Found: 166.0863. **IR (neat, cm<sup>-1</sup>)**: 3450, 3157, 1666, 1598, 1467, 1422, 1371, 1274, 1176, 1032, 805.

**Synthesis of methyl 6-methoxy-3-((3, 4, 5-trimethoxyphenyl) amino) benzofuran-2-carboxylate (**3g**)<sup>25</sup>**

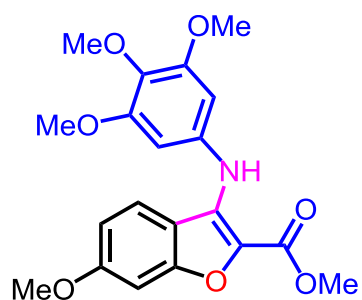

2-Hydroxy-4-methoxybenzotrile **2g** was prepared on a gram scale (94% yield, 1.40 g). Methyl 3-(3,4,5-trimethoxyphenylamino)-6-methoxybenzofuran-2-carboxylate **3g'** was synthesized by the known procedure.<sup>26</sup> Under N<sub>2</sub>, a dry Schlenk tube equipped with a magnetic stir bar was charged with **3g'** (110.6 mg, 0.5 mmol), Pd(OAc)<sub>2</sub> (6.7 mg, 6 mol %), rac-BINAP (37.0 mg, 12 mol %), CsCO<sub>3</sub> (230.0 mg, 0.7 mmol), 5-bromo-1,2,3-trimethoxybenzene (148.0 mg, 0.6 mmol), and dry toluene (5 mL). The reaction mixture was stirred at 120 °C for 18 h. After cooling, the mixture was diluted with ethyl acetate (10 mL), filtered through a plug of silica gel, and washed with ethyl acetate (10 mL). The filtrate was washed with water (5 mL) and brine (5 mL), dried over anhydrous Na<sub>2</sub>SO<sub>4</sub>, concentrated under *vacuo*. The residue was purified by flash column chromatography on silica gel (petroleum ether/ethyl acetate = 4/1 to 2/1) to give **3g** in 75% yield (145.3 mg) as a yellow solid. **m.p.** 138-139 °C. **R<sub>f</sub>** = 0.49 (PE/EA = 2/1). **<sup>1</sup>H NMR (400 MHz, CDCl<sub>3</sub>)** δ 7.70 (s, 1H), 7.19 (d, *J* = 8.9 Hz, 1H), 6.92 (d, *J* = 2.2 Hz, 1H), 6.71 (dd, *J* = 8.9 and 2.3 Hz, 1H), 6.41 (s, 2H), 3.95 (s, 3H), 3.84 (s, 3H), 3.83 (s, 3H), 3.76 (s, 6H) ppm. **<sup>13</sup>C NMR (100 MHz, CDCl<sub>3</sub>)** δ 161.8, 161.2, 156.1, 153.5, 137.2, 136.6, 134.7, 126.9, 123.9,

113.9, 112.1, 99.6, 95.7, 61.0, 56.0, 55.6, 51.5 ppm.

**Synthesis of 2,2-difluoro-7-methyl-4-(methylthio)-2H-2λ<sup>4</sup>-benzo[e][1,3,2]oxazaborinine (4)**

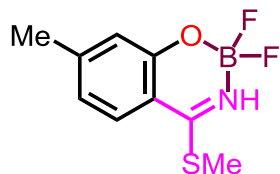

To a solution of *m*-cresol **1c** (108.1 mg, 1.0 mmol), CH<sub>3</sub>SCN (0.14 mL, 146.2 mg, 2.0 mmol), and AlCl<sub>3</sub> (133.3 mg, 1.0 mmol) in DCE (1 mL) was added BF<sub>3</sub>•OEt<sub>2</sub> (0.25 mL, 283.8 mg, 2.0 mmol). The reaction mixture was stirred at 80 °C for 24 h. Upon completion, the mixture was diluted with ethyl acetate, and then concentrated under *vacuo*. The residue was purified by flash column chromatography on silica gel using dichloromethane-ethyl acetate (v/v, from 20/1 to 10/1) as an eluent to give the desired product **4** in 87% yield (199.3 mg) as a white solid. **m.p.** 276-277 °C. R<sub>f</sub> = 0.49 (DCM/EA = 10/1). **<sup>1</sup>H NMR (400 MHz, DMSO-*d*<sub>6</sub>)** δ 10.42 (s, 1H), 7.67 (d, *J* = 8.1 Hz, 1H), 6.86 (s, 1H), 6.83 (d, *J* = 8.5 Hz, 1H), 2.73 (s, 3H), 2.32 (s, 3H) ppm. **<sup>19</sup>F NMR (376 MHz, DMSO-*d*<sub>6</sub>)** δ -133.70 ppm. **<sup>13</sup>C NMR (100 MHz, DMSO-*d*<sub>6</sub>)** δ 176.8, 156.3, 148.6, 126.9, 121.2, 119.4, 113.0, 21.4, 12.8 ppm. **HRMS (EI<sup>+</sup>):** Calcd for C<sub>9</sub>H<sub>10</sub>BF<sub>2</sub>NOS [M]<sup>+</sup>: 229.0539; Found: 229.0542. IR (neat, cm<sup>-1</sup>): 3325, 2933, 1621, 1593, 1498, 1444, 1325, 1280, 1222, 1156, 1046, 938.

## 5. Reference

1. Z. He, H. J. Shriver, J. A. Fernandez-Salas, A. Abengozar, J. Neufeld, K. Yang, A. P. Pulis and D. J. Procter, Synthesis of C2 substituted benzothiophenes via an interrupted pummerer/[3,3]-sigmatropic/1,2-migration cascade of benzothiophene S-oxides, *Angew. Chem. Int. Ed.*, 2018, **57**, 5759.
2. M. Mor, S. Rivara, A. Lodola, P. V. Plazzi, G. Tarzia, A. Duranti, A. Tontini, G. Piersanti, S. Kathuria and D. Piomelli, Cyclohexylcarbamic acid 3'- or 4'-substituted biphenyl-3-yl esters as fatty acid amide hydrolase inhibitors: synthesis, quantitative structure-activity relationships, and molecular modeling studies, *J. Med. Chem.*, 2004, **47**, 4998.
3. L.W. L. Woo, B. Leblond, A. Purohit and B. V. L. Potter, Synthesis and evaluation

of analogues of estrone-3-O-sulfamate as potent steroid sulfatase inhibitors, *Bioorg. Med. Chem.*, 2012, **20**, 2506-2519.

4. J. Feng, X.-B. Yang, S. Liang, J. Zhang and X.-Q. Yu, An efficient oxidative coupling method for synthesis of novel diastereomeric biaryl diols derived from estrone, *Tetrahedron Lett.*, 2013, **54**, 355.

5. B. Schmidt and M. Riemer, Suzuki–Miyaura coupling of halophenols and phenol boronic acids: systematic investigation of positional isomer effects and conclusions for the synthesis of phytoalexins from pyrinae, *J. Org. Chem.*, 2014, **79**, 4104.

6. Y.-F. Liang, S. Song, L. Ai, X. Li, N. Jiao, Highly efficient metal-free approach to meta- and multiple-substituted phenols via a simple oxidation of cyclohexenones, *Green Chem.*, 2016, **18**, 6462.

7. J. Luo, S. Preciado, I. Larrosa, Overriding ortho–para selectivity via a traceless directing group relay strategy: the meta-selective arylation of phenols. *J. Am. Chem. Soc.*, 2014, **136**, 4109.

8. J. J. Molloy, R. P. Law, J. W. B. Fyfe, C. P. Seath, D. J. Hirst, A. J. B. Watson, A modular synthesis of functionalised phenols enabled by controlled boron speciation, *Org. Biomol. Chem.*, 2015, **13**, 3093.

9. G. A. Molander, S. L. J. Trice, S. M. Kennedy, Scope of the two-step, one-pot palladium-catalyzed borylation/suzuki cross-coupling reaction utilizing bis-boronic acid, *J. Org. Chem.*, 2012, **77**, 8678.

10. L. Prokai, S.-M. Oon, K. Prokai-Tatrai, K. A. Abboud, J. W. Simpkins, Synthesis and biological evaluation of 17 $\beta$ -alkoxyestra-1,3,5(10)-trienes as potential neuroprotectants against oxidative stress, *J. Med. Chem.*, 2001, **44**, 110.

11. J.-H. Liu, C.-T. Yang, X.-Y. Lu, Z.-Q. Zhang, L. Xu, M. Cui, X. Lu, B. Xiao, Y. Fu, L. Liu, Copper-catalyzed reductive cross-coupling of nonactivated alkyl tosylates and mesylates with alkyl and aryl bromides, *Chem. Eur. J.*, **2014**, *20*, 15334-15338.

12. Y. Nakai, K. Moriyama and H. Togo, Facile one-pot transformation of phenols into o-cyanophenols, *Eur. J. Org. Chem.*, 2014, 6077.

13. N. Tezuka, K. Shimojo, K. Hirano, S. Komagawa, K. Yoshida, C. Wang, K.

Miyamoto, T. Saito, R. Takita and M. Uchiyama, Direct hydroxylation and amination of arenes via deprotonative cupration, *J. Am. Chem. Soc.*, 2016, **138**, 9166.

14. E. Whiting, M.E. Lanning, J. A. Scheenstra, S. Fletcher, Chromatography-free entry to substituted salicylonitriles: mitsunobu-triggered domino reactions of salicylaldoximes, *J. Org. Chem.*, 2015, **80**, 1229.

15. E. Marcus, ueber stickstoffhaltige Abkommlinge einiger Dioxybenzaldehyde, *Ber. Dtsch. Chem. Ges.*, 1891, **24**, 3650.

16. M. Adachi and T. Sugawara, Exclusive ortho cyanation and alkylthiocarbonylation of anilines and phenols using boron trichloride, *Synth. Commun.*, 1990, **20**, 71.

17. M. Mulzer and G. W. Coates, A catalytic route to ampakines and their derivatives, *Org. Lett.*, 2011, **13**, 1426.

18. H. C. Aspinnall, O. Beckingham, M. D. Farrar, N. Greeves and C. D Thomas, A general and convenient route to oxazolyl ligands, *Tetrahedron Lett.* **2011**, *52*, 5120.

19. M. N. Kumaraswamy, D. A. Prathima Mathias, C. Chandrashekar and V. P. Vaidya, Synthesis and pharmacological evaluation of 2-mercapto-4-substituted-naphtho[2,1-*b*]furo[3,2-*d*]pyrimidines, *Indian J. Pharm. Sci.* 2006, **68**, 731.

20. Y. Gan, G. Wang, X. Xie and Y. Liu, Nickel-catalyzed cyanation of phenol derivatives with Zn(CN)<sub>2</sub> involving C–O bond cleavage, *J. Org. Chem.* 2018, **83**, 14036.

21. H. Park, J. Choi, S. Choi, M. Park, J. Lee, Y.-G. Suh, H. Cho, U. Oh, H.-D. Kim, Y. H. Joo, S.-Y. Kim, Y.-H. Park, Y. S. Jeong, J. K. Choi, J. K. Kim and S. Jew, *N*-4-Methansulfonamidobenzyl-*N*-2-substituted-4-tert-butyl-benzyl thioureas as potent vanilloid receptor antagonistic ligands, *Bioorg. Med. Chem. Lett.* 2004, **14**, 1693.

22. X. Wang, C. Li, X. Wang, Q. Wang, X.-Q. Dong, A. Duan, W. Zhao, Metal-free etherification of aryl methyl ether derivatives by C–OMe bond cleavage, *Org. Lett.* 2018, **20**, 4267.

23. F. M. Hauser and S. R. Ellenberger, Regiospecific oxidation of methyl groups in dimethylanisoles, *Synthesis*, 1987, **8**, 723.



24. C. W. Liskey, X. Liao and J. F. Hartwig. Cyanation of arenes via iridium-catalyzed borylation, *J. Am. Chem. Soc.*, 2010, **132**, 11389.
25. R. Romagnoli, P. G. Baraldi, M. K. Salvador, F. Prencipe, C. Lopez-Cara, S. S. Ortega, A. Brancale, E. Hamel, I. Castagliuolo, S. Mitola, R. Ronca, R. Bortolozzi, E. Porcu, G. Basso and G. Viola, Design, synthesis, in vitro, and in vivo anticancer and antiangiogenic activity of novel 3- arylaminobenzofuran derivatives targeting the colchicine site on tubulin, *J. Med. Chem.*, 2015, **58**, 3209.

## 6. Copies of $^1\text{H}$ NMR and $^{13}\text{C}$ NMR spectra

$^1\text{H}$  NMR spectrum of **1k** (400 MHz,  $\text{CDCl}_3$ )

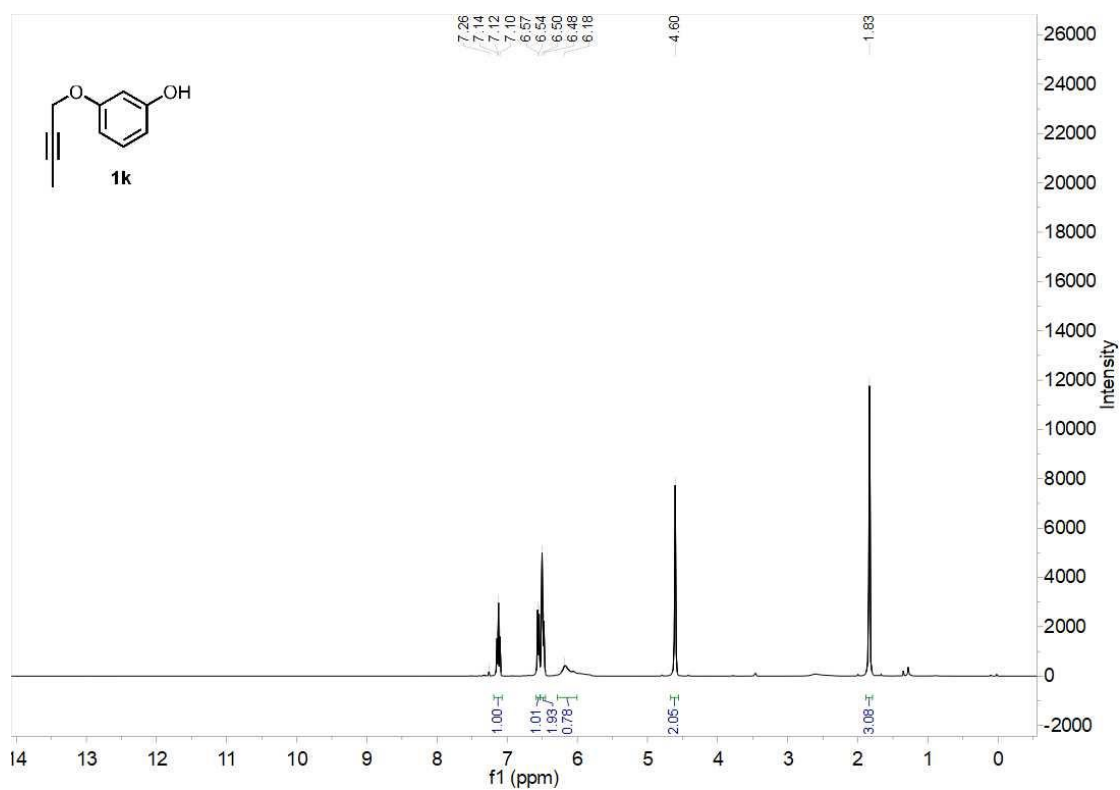

$^{13}\text{C}$  NMR spectrum of **1k** (100 MHz,  $\text{CDCl}_3$ )

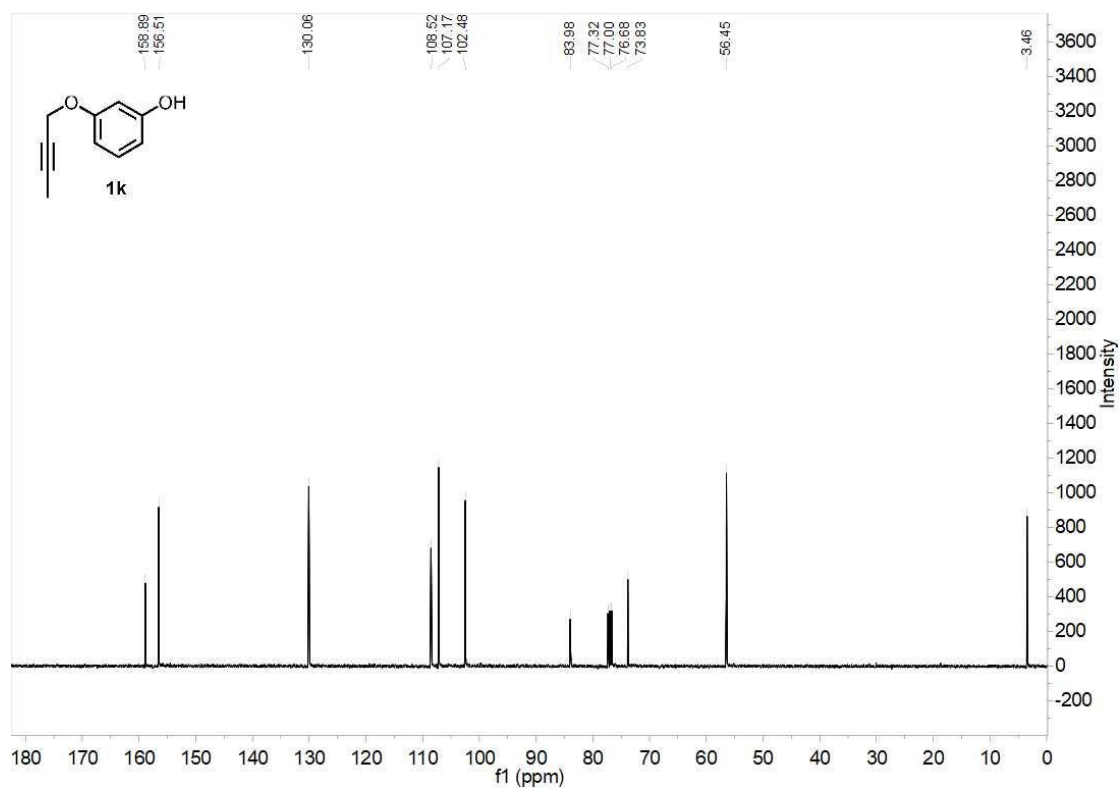

<sup>1</sup>H NMR spectrum of **1o** (400 MHz, CDCl<sub>3</sub>)

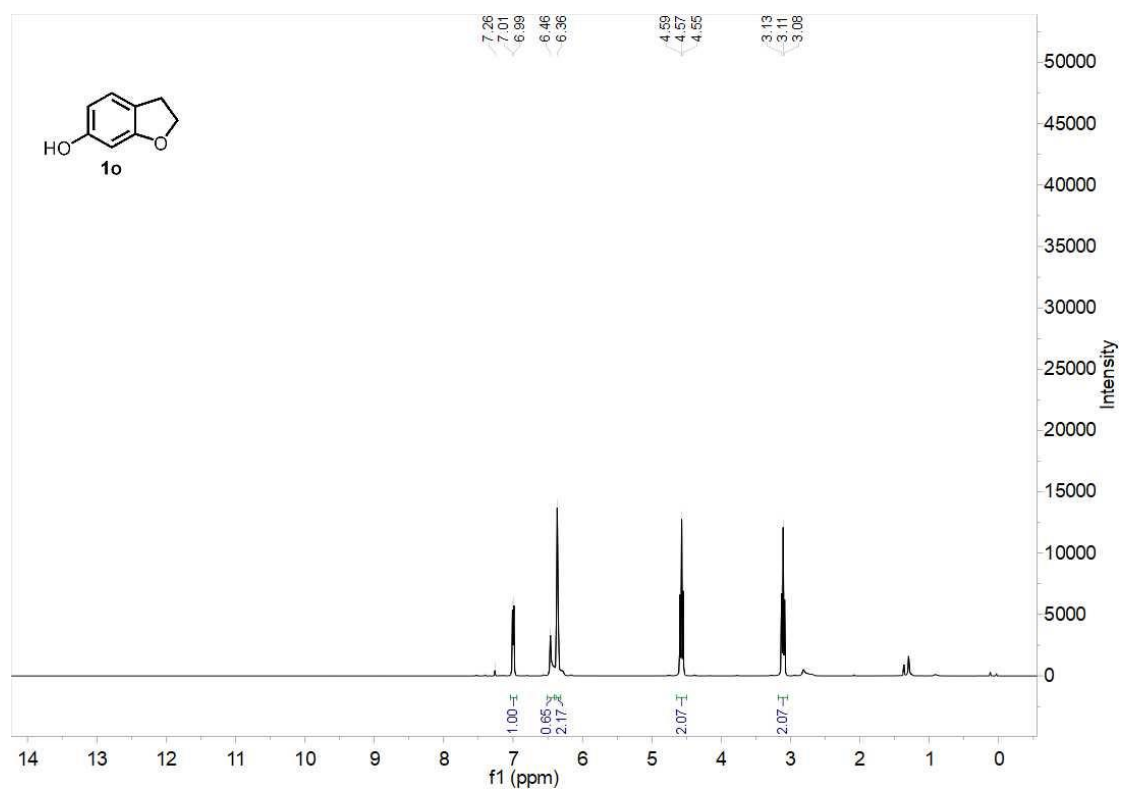

<sup>13</sup>C NMR spectrum of **1o** (100 MHz, CDCl<sub>3</sub>)

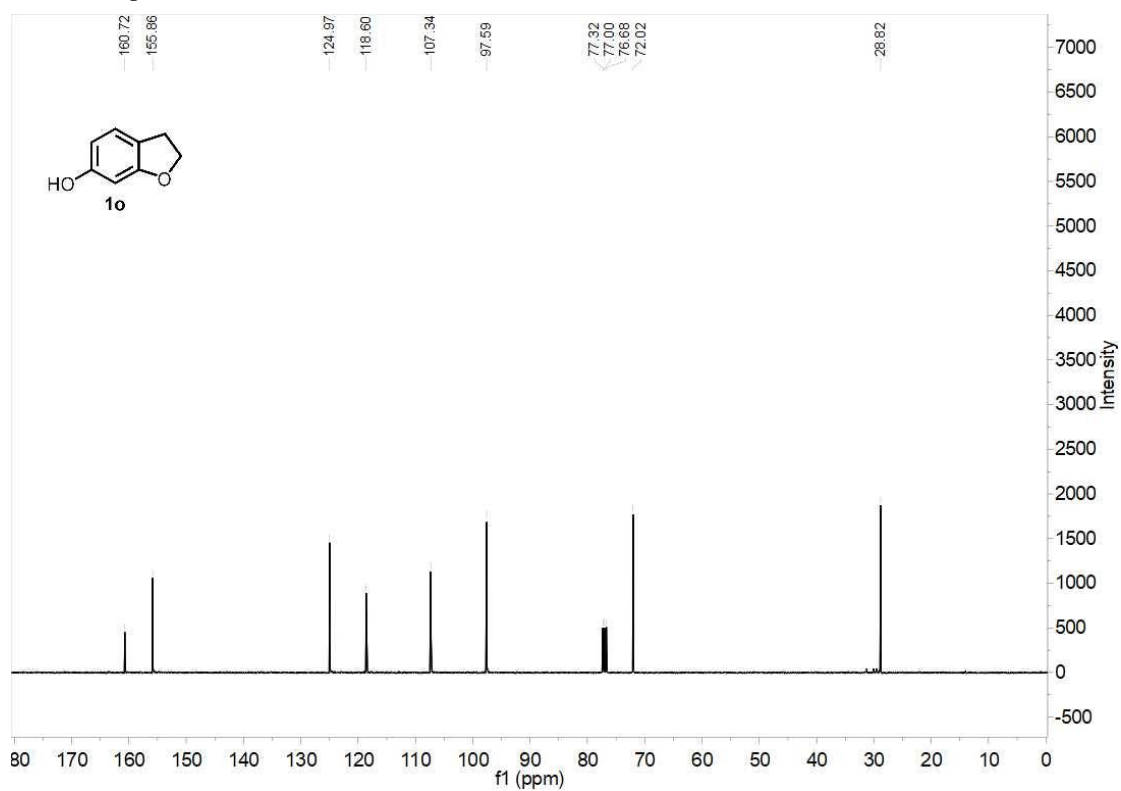

$^1\text{H}$  NMR spectrum of **1r** (400 MHz,  $\text{CDCl}_3$ )

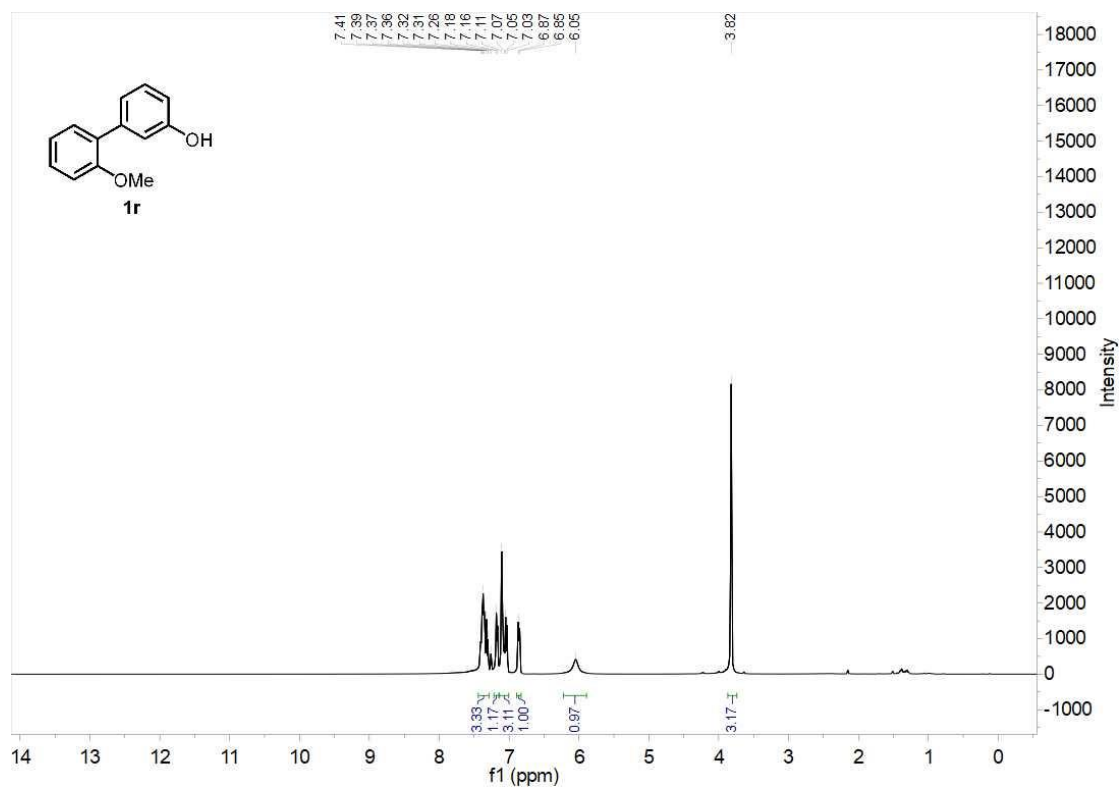

$^{13}\text{C}$  NMR spectrum of **1r** (100 MHz,  $\text{CDCl}_3$ )

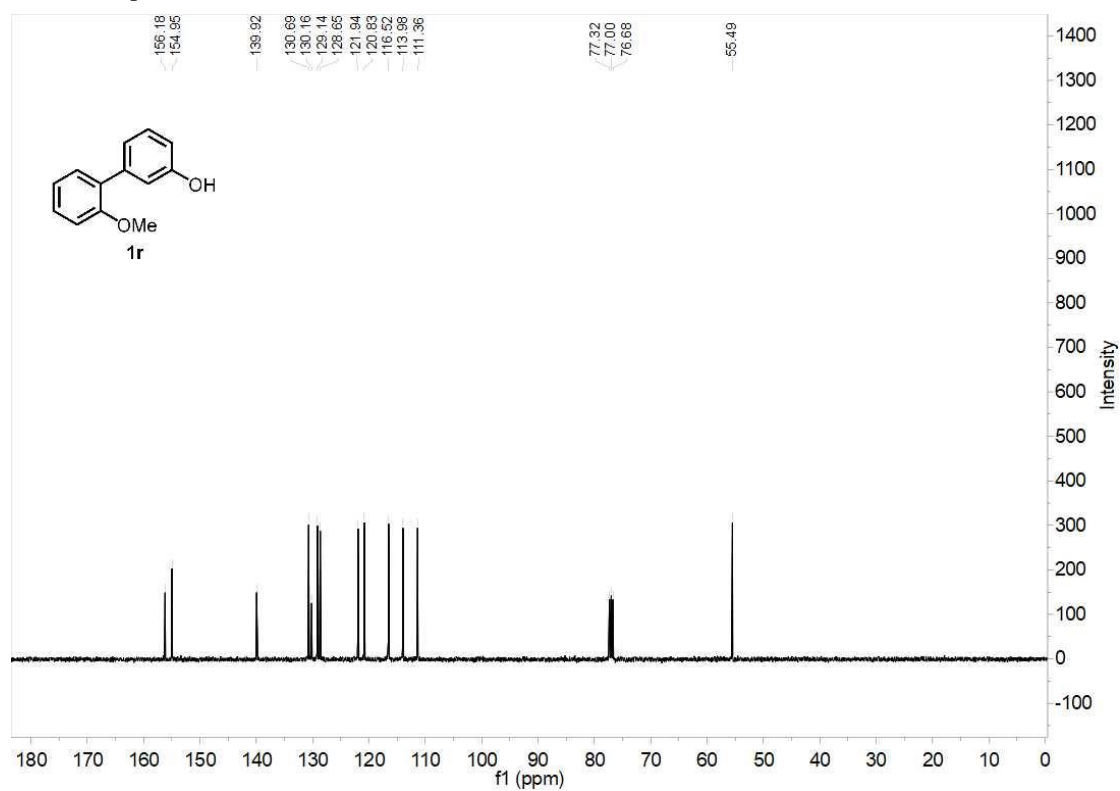

<sup>1</sup>H NMR spectrum of **1s** (400 MHz, CDCl<sub>3</sub>)

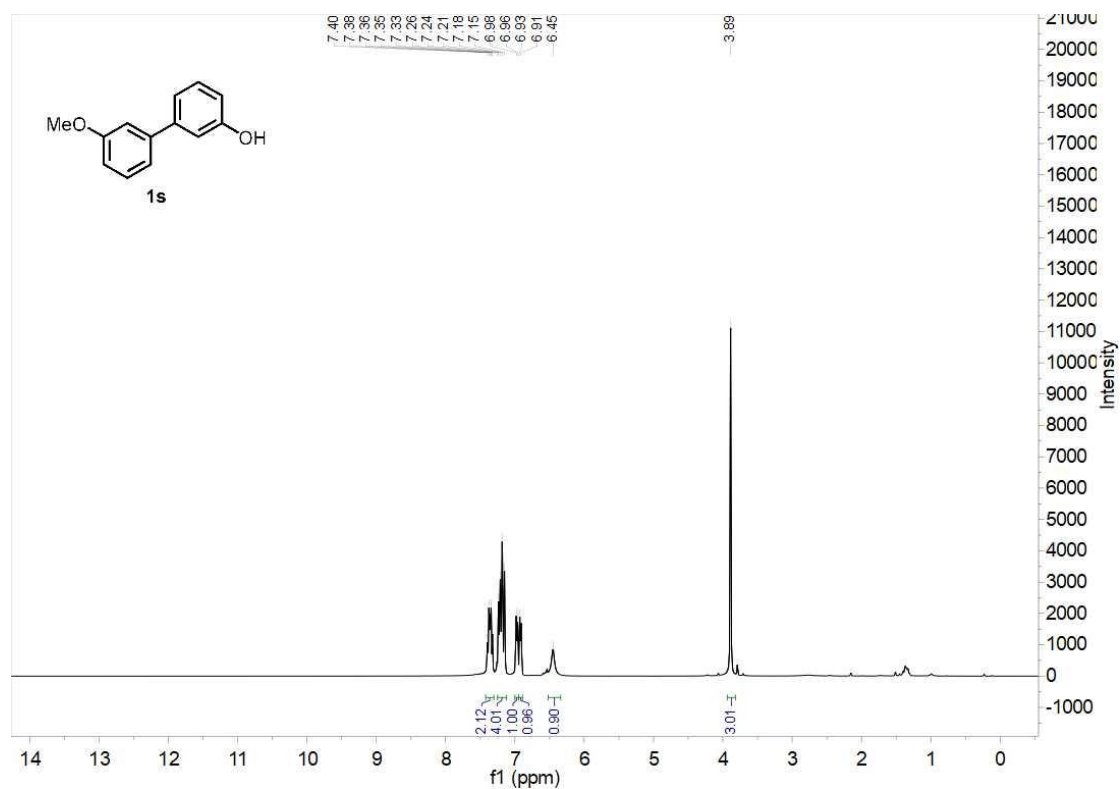

<sup>13</sup>C NMR spectrum of **1s** (100 MHz, CDCl<sub>3</sub>)

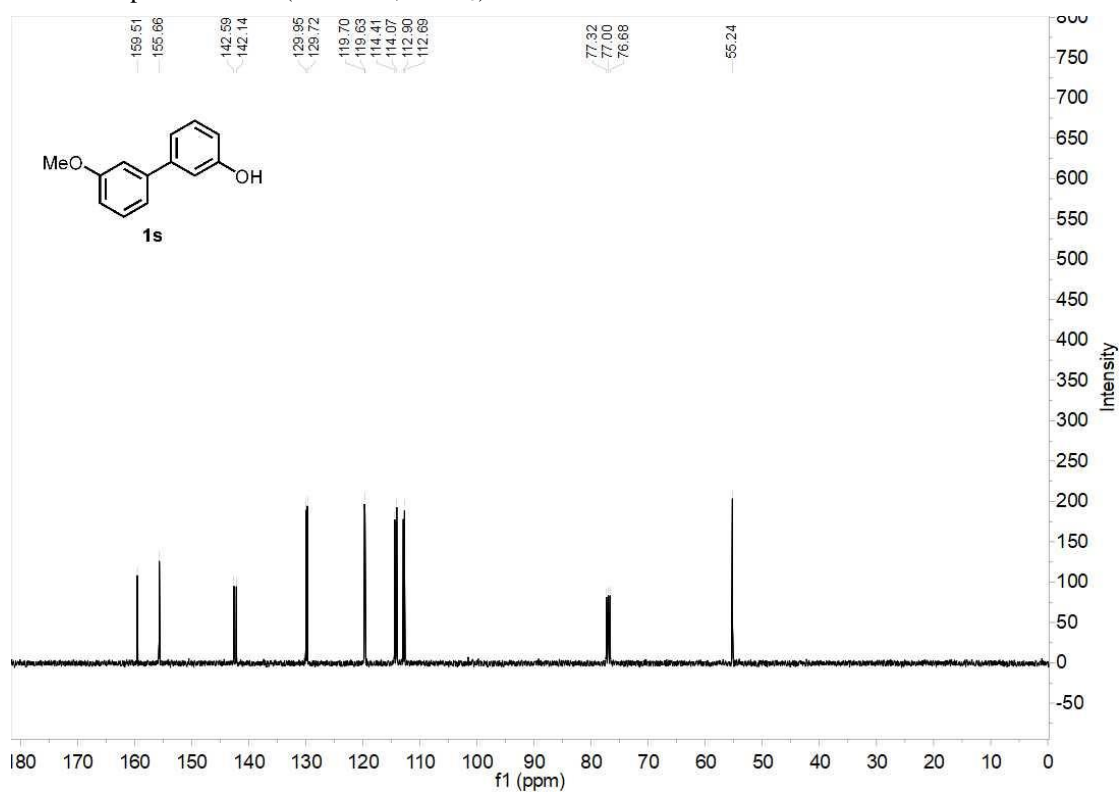

<sup>1</sup>H NMR spectrum of **1t** (400 MHz, CDCl<sub>3</sub>)

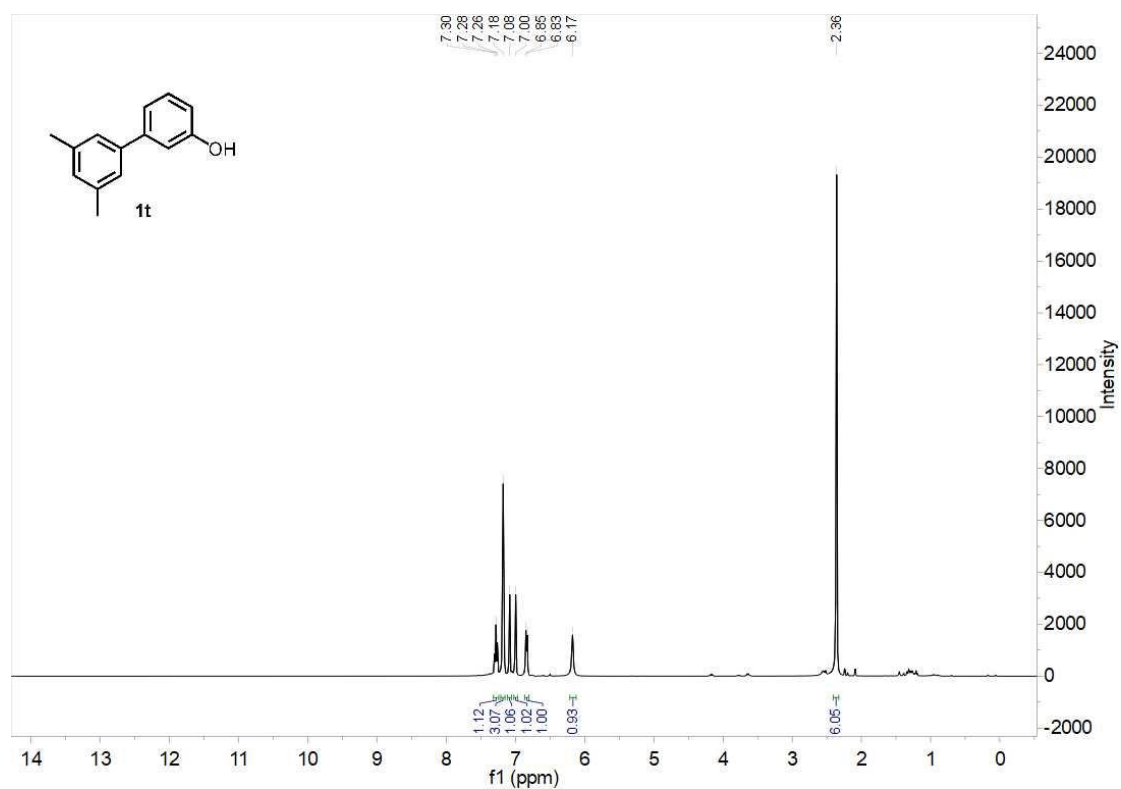

<sup>13</sup>C NMR spectrum of **1t** (100 MHz, CDCl<sub>3</sub>)

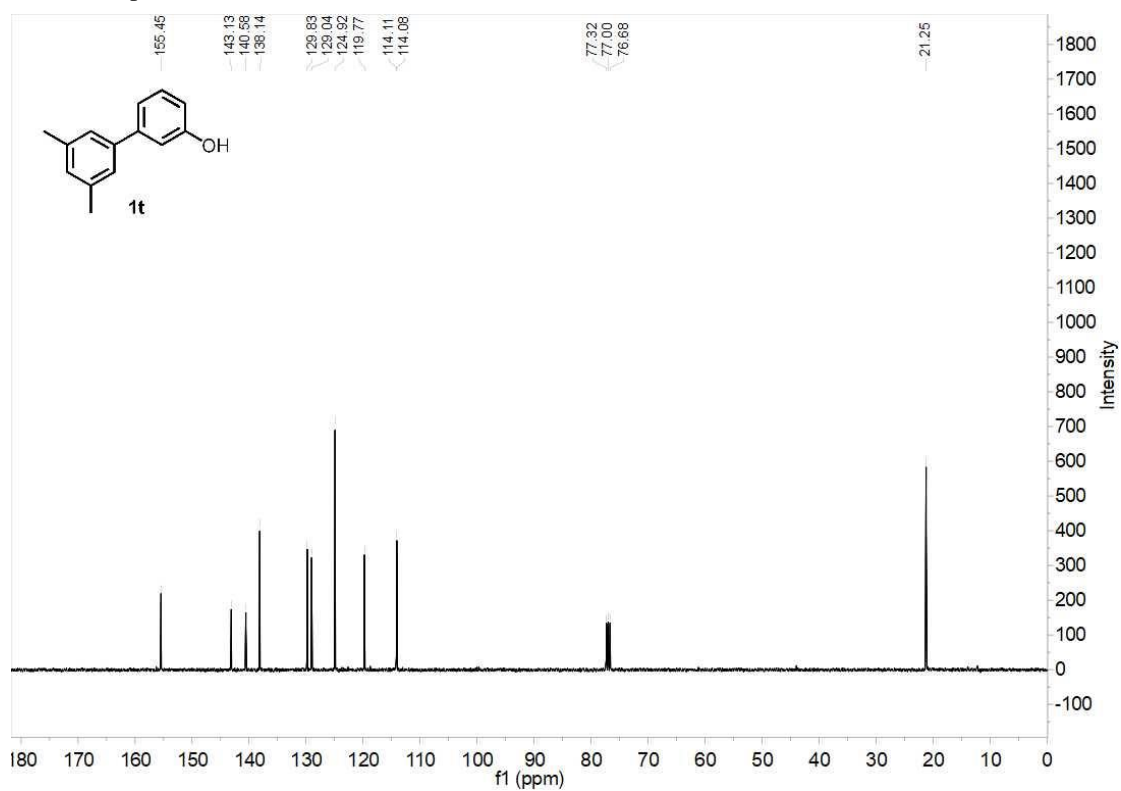

<sup>1</sup>H NMR spectrum of **1v** (400 MHz, CDCl<sub>3</sub>)

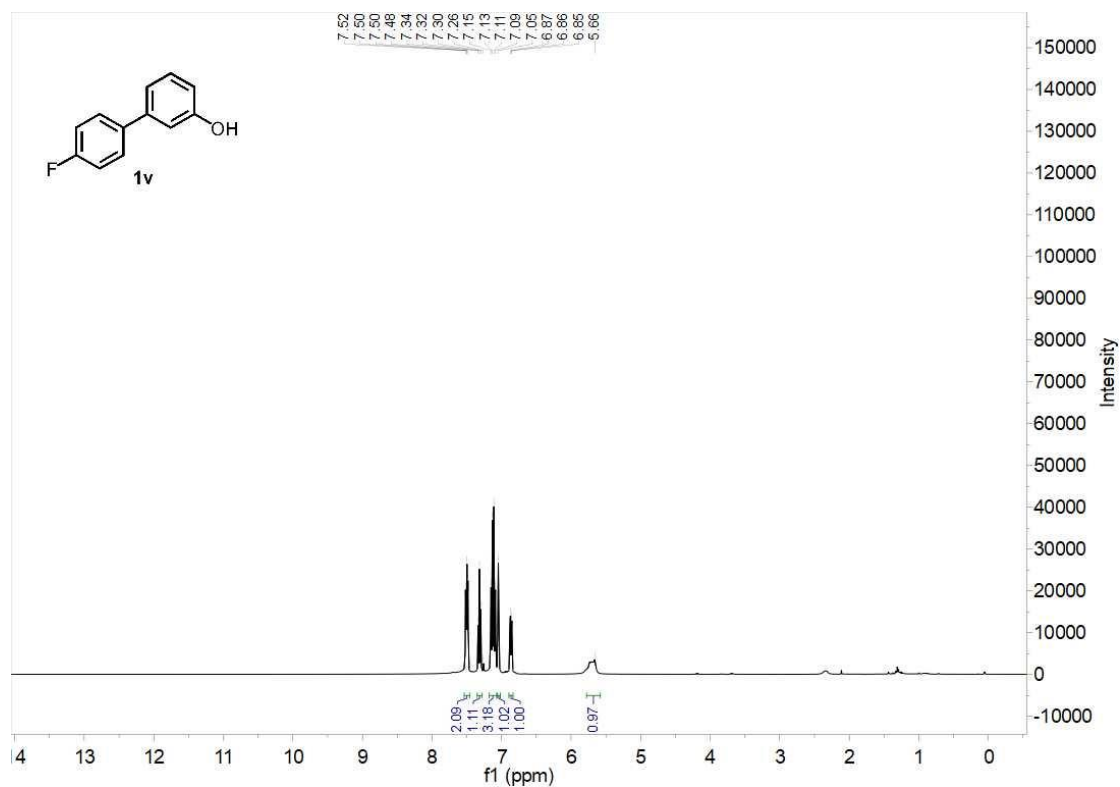

<sup>13</sup>C NMR spectrum of **1v** (100 MHz, CDCl<sub>3</sub>)

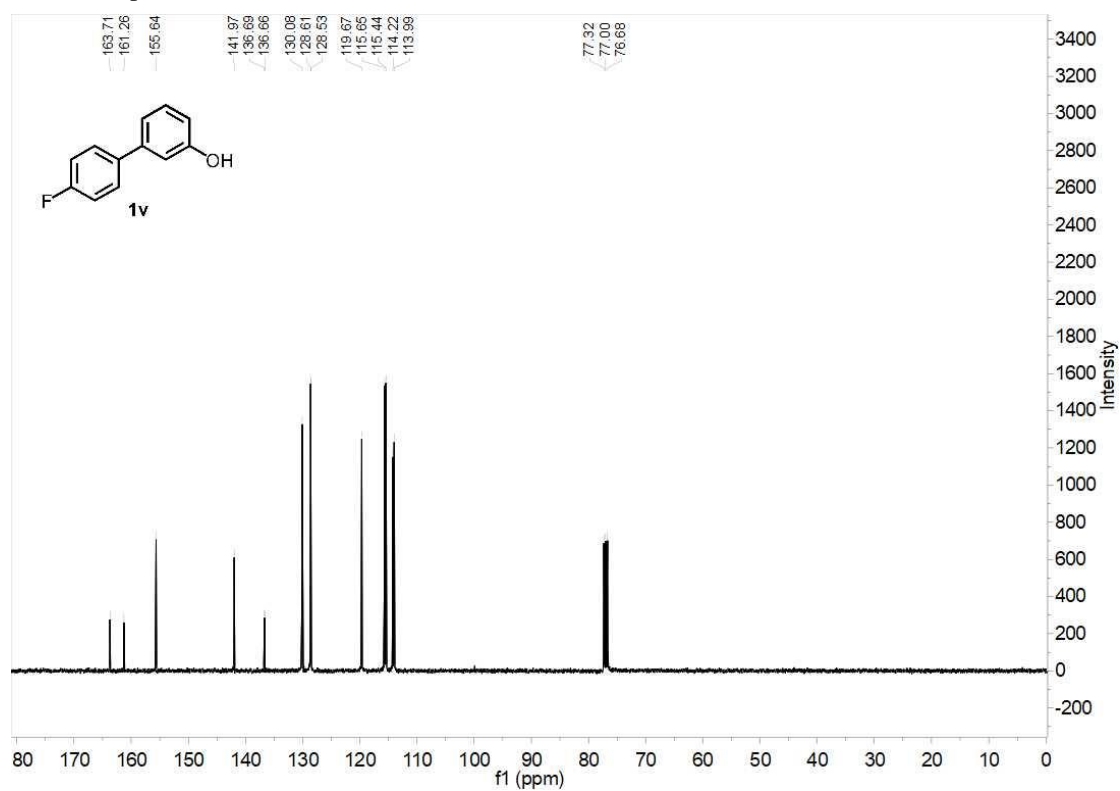

$^1\text{H}$  NMR spectrum of **1w** (400 MHz,  $\text{CDCl}_3$ )

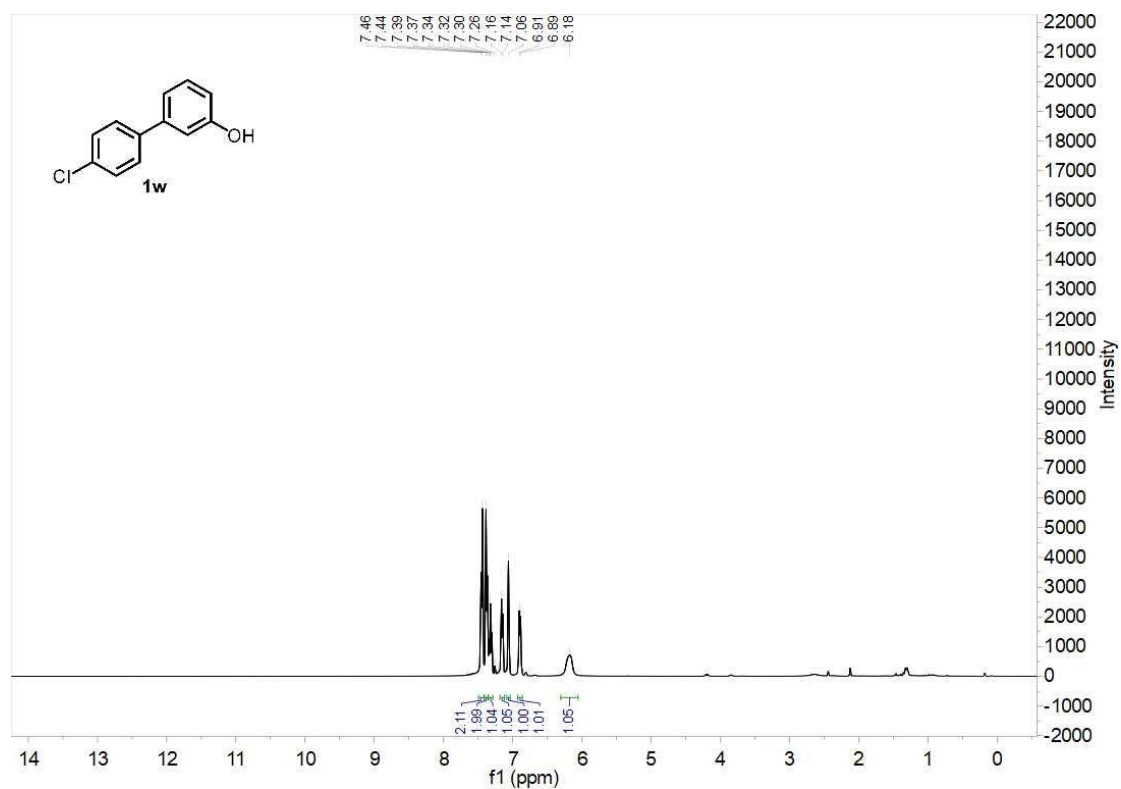

$^{13}\text{C}$  NMR spectrum of **1w** (100 MHz,  $\text{CDCl}_3$ )

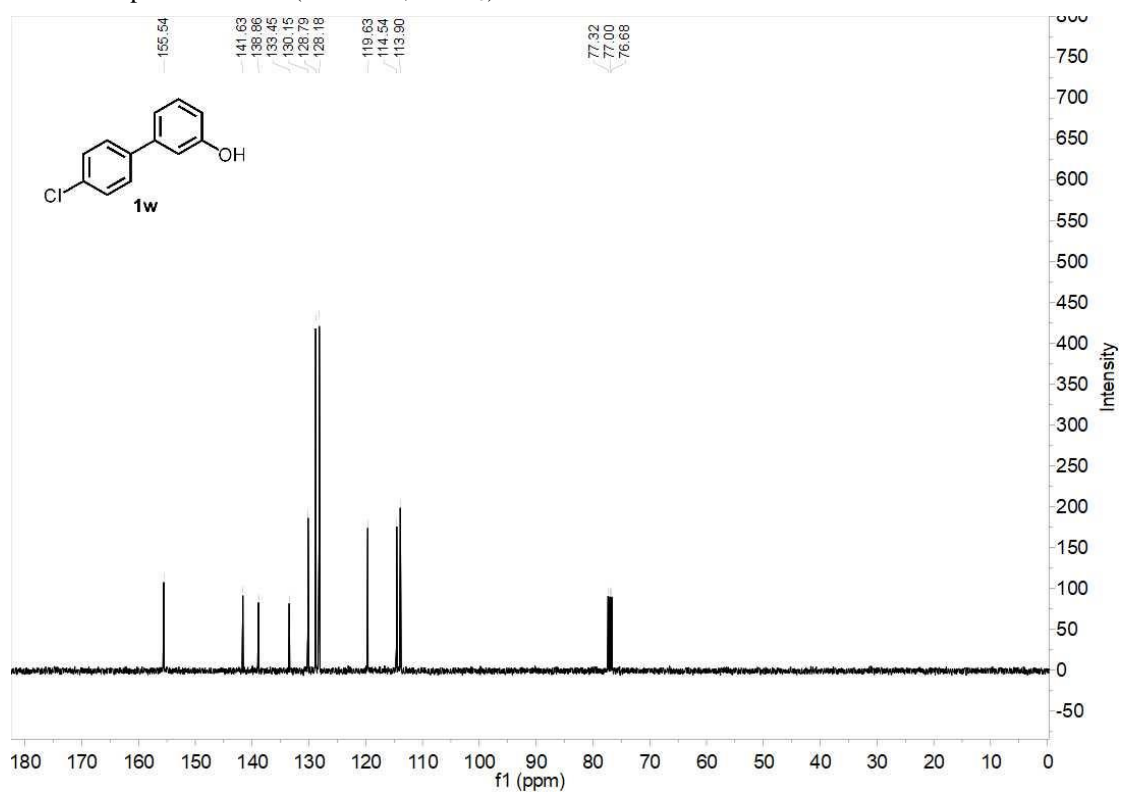



<sup>1</sup>H NMR spectrum of **1x** (400 MHz, CDCl<sub>3</sub>)

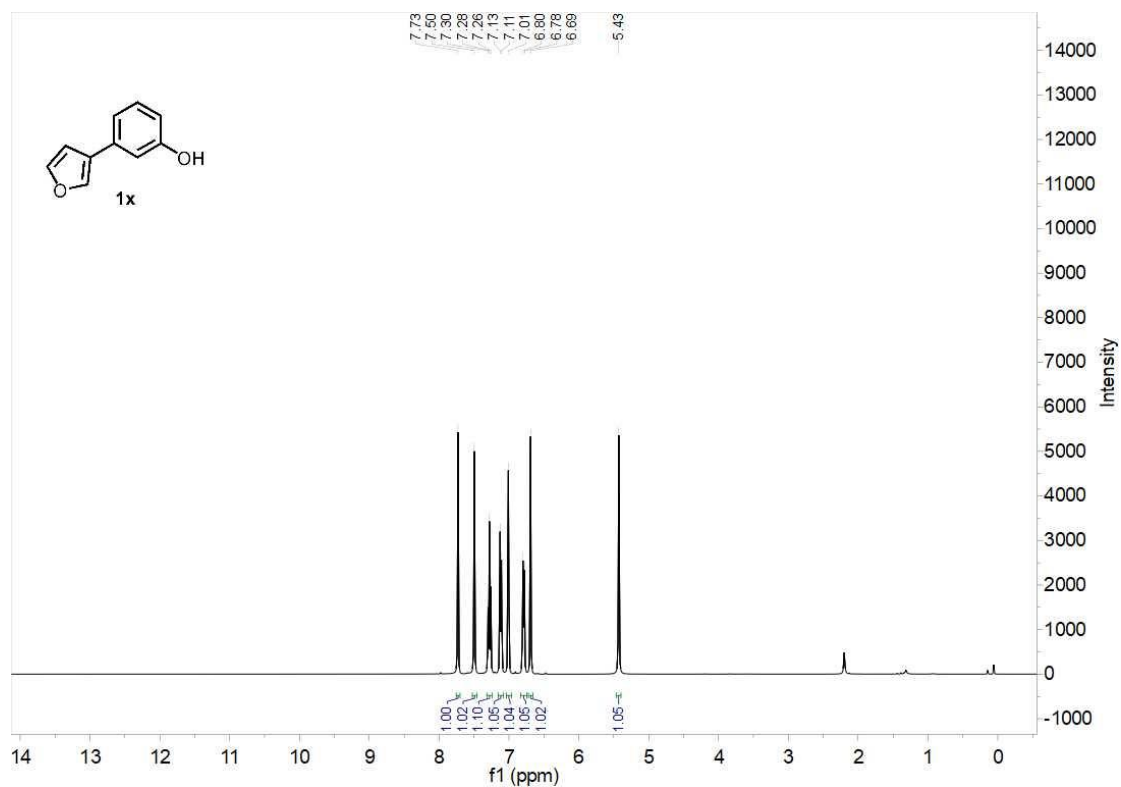

<sup>13</sup>C NMR spectrum of **1x** (100 MHz, CDCl<sub>3</sub>)

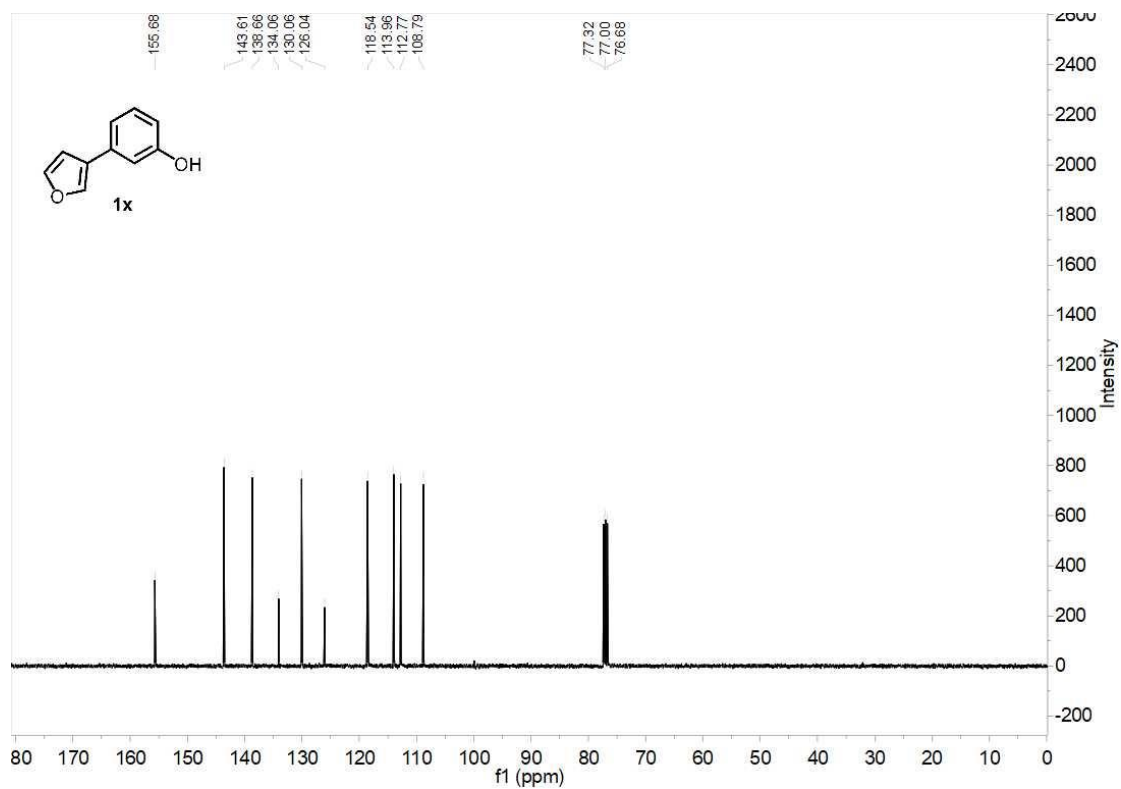

<sup>1</sup>H NMR spectrum of **1y** (400 MHz, CDCl<sub>3</sub>)

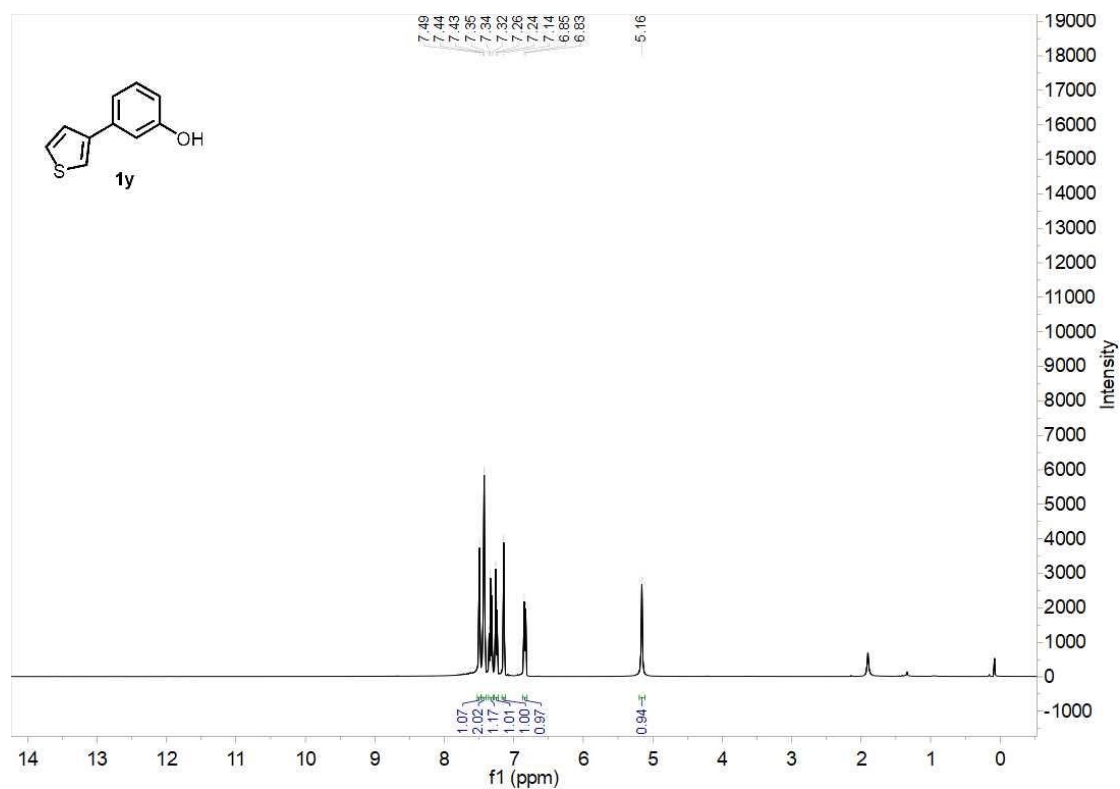

<sup>13</sup>C NMR spectrum of **1y** (100 MHz, CDCl<sub>3</sub>)

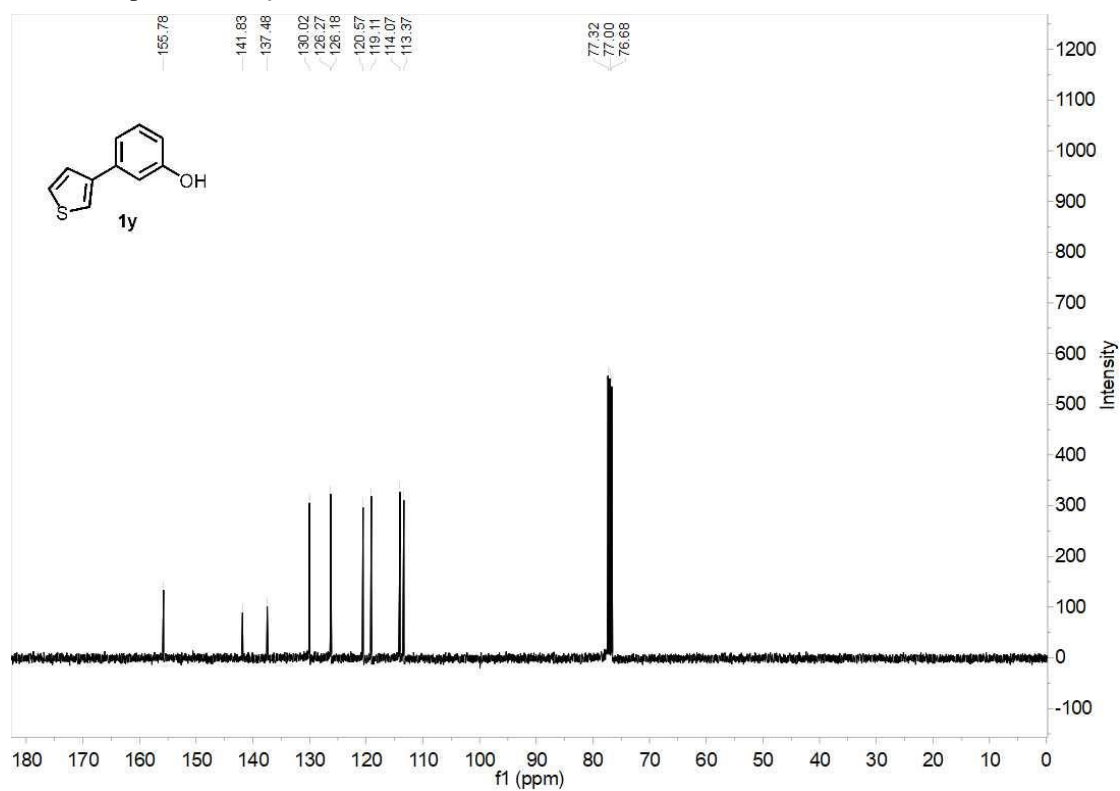

$^1\text{H}$  NMR spectrum of **1aa** (400 MHz,  $\text{DMSO-}d_6$ )

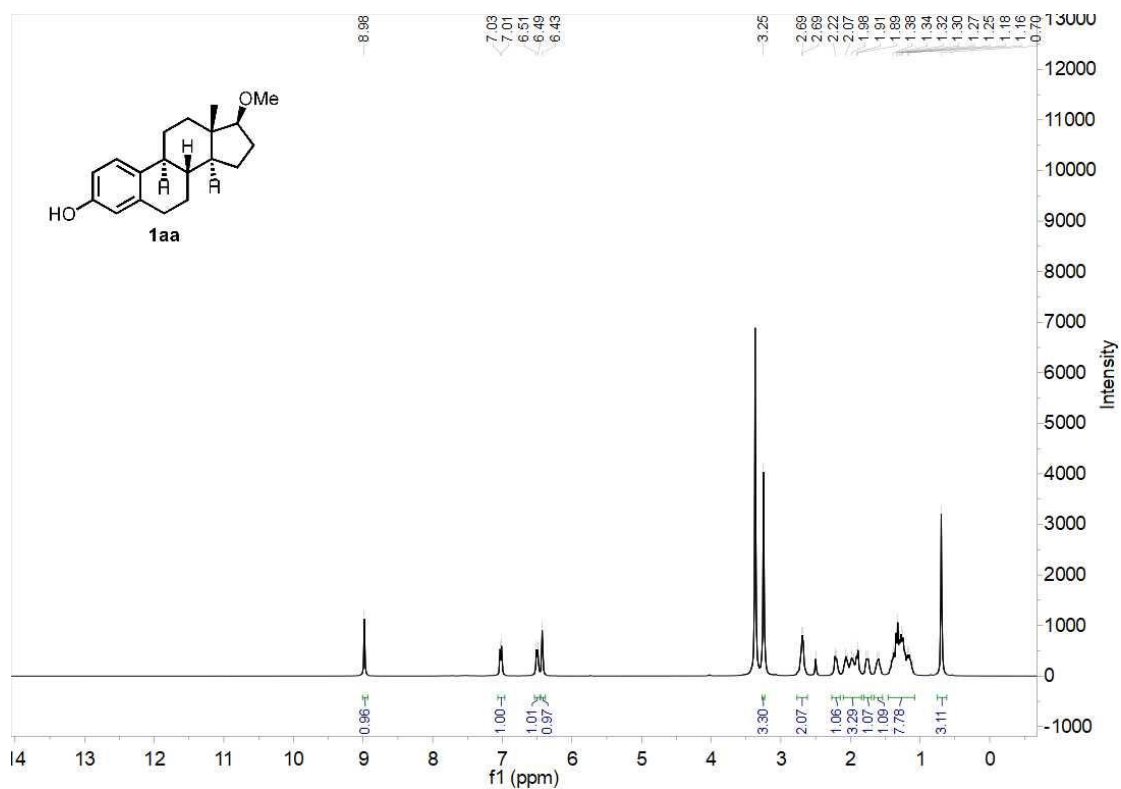

$^{13}\text{C}$  NMR spectrum of **1aa** (100 MHz,  $\text{DMSO-}d_6$ )

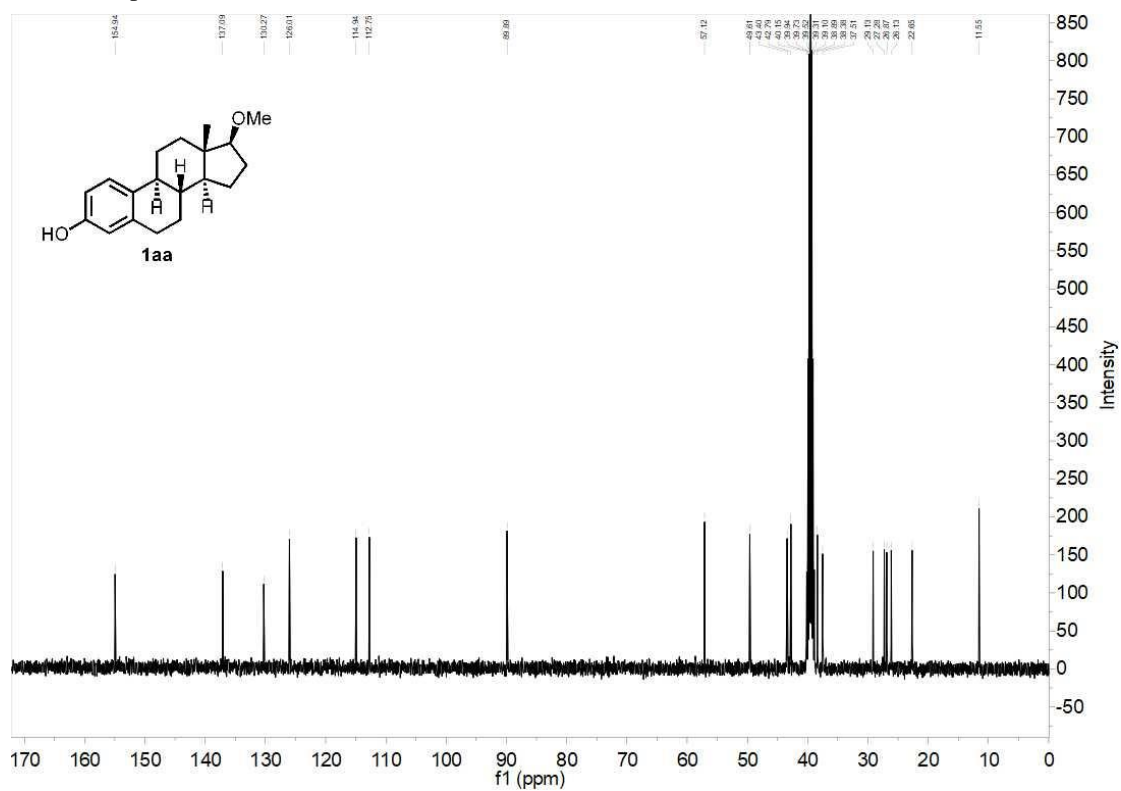

$^1\text{H}$  NMR spectrum of **2a** (400 MHz,  $\text{DMSO-}d_6$ )

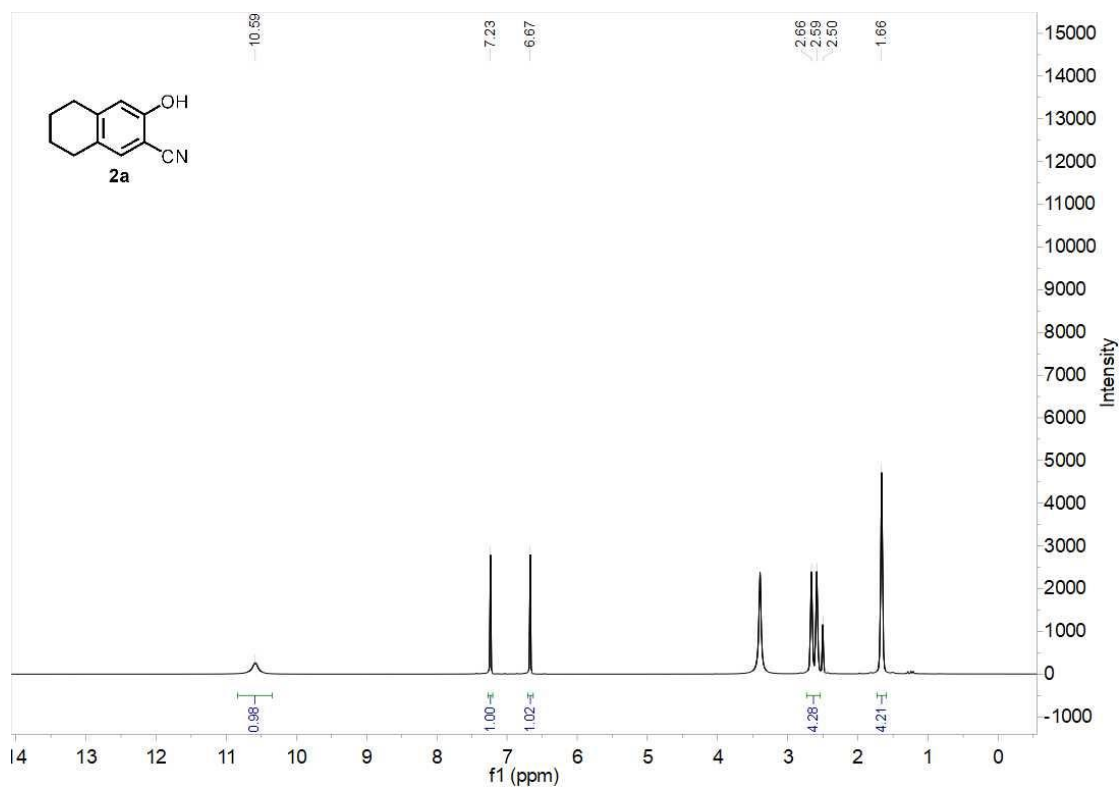

$^{13}\text{C}$  NMR spectrum of **2a** (100 MHz,  $\text{DMSO-}d_6$ )

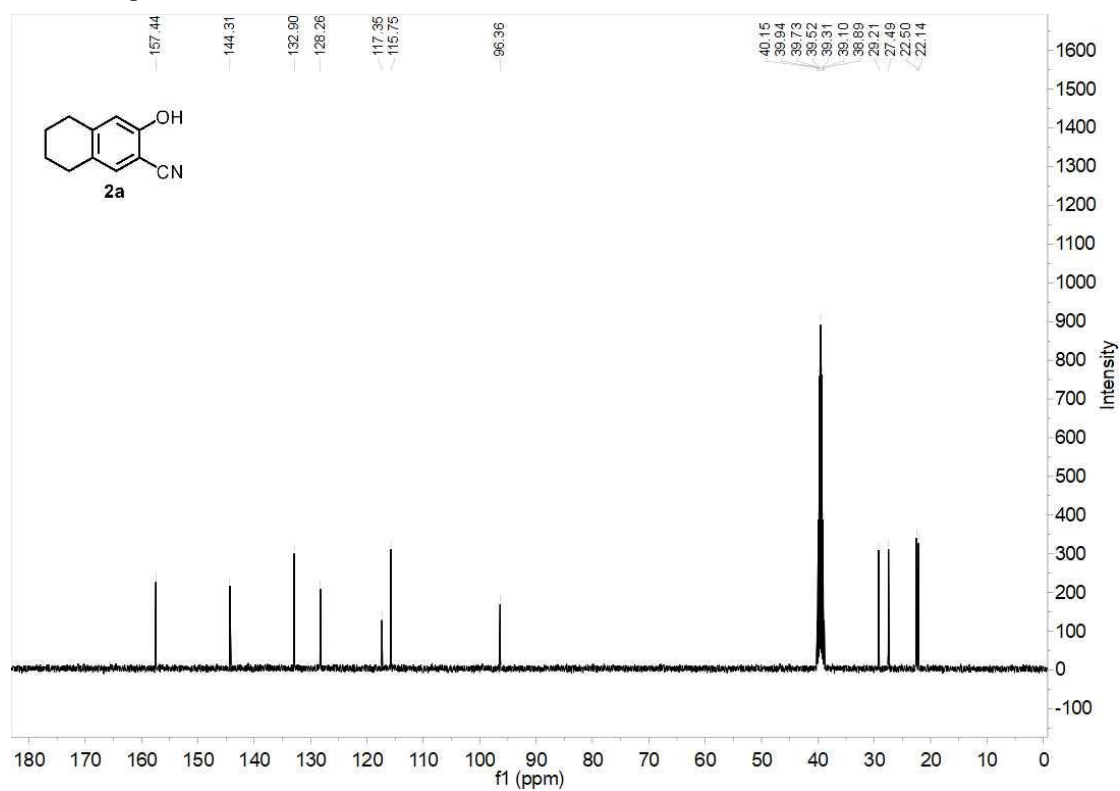

$^1\text{H}$  NMR spectrum of **2b** (400 MHz,  $\text{DMSO}-d_6$ )

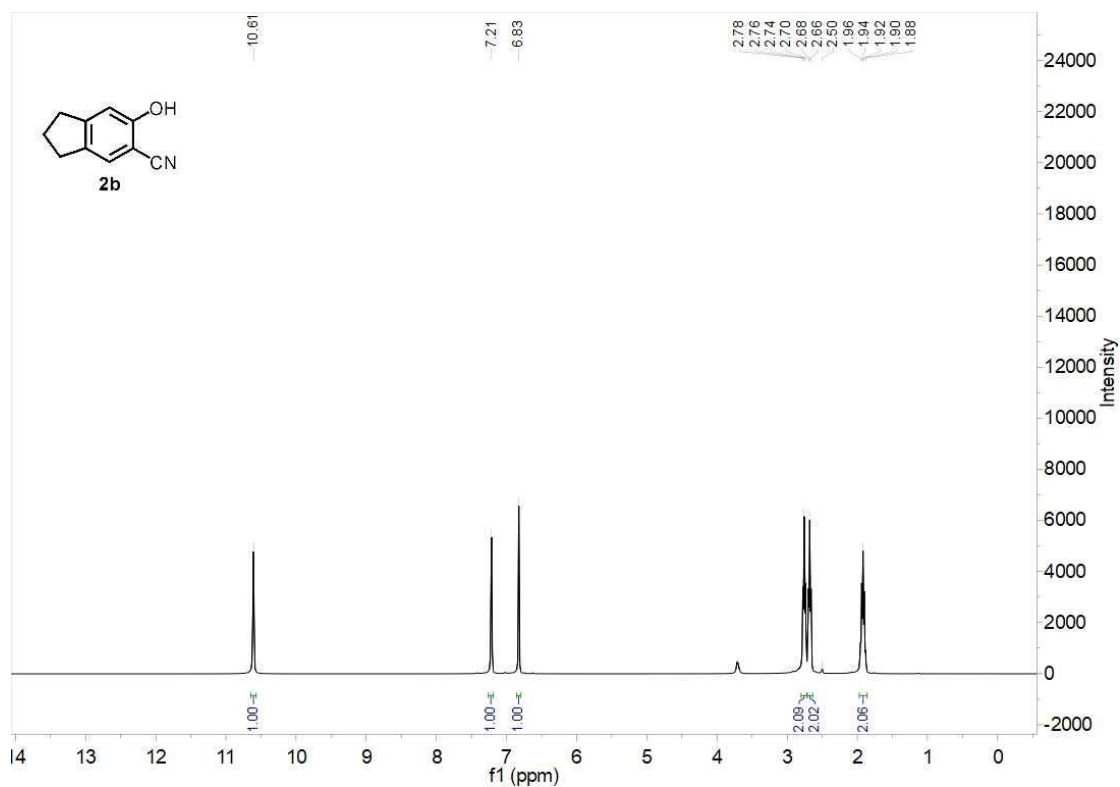

$^{13}\text{C}$  NMR spectrum of **2b** (100 MHz,  $\text{DMSO}-d_6$ )

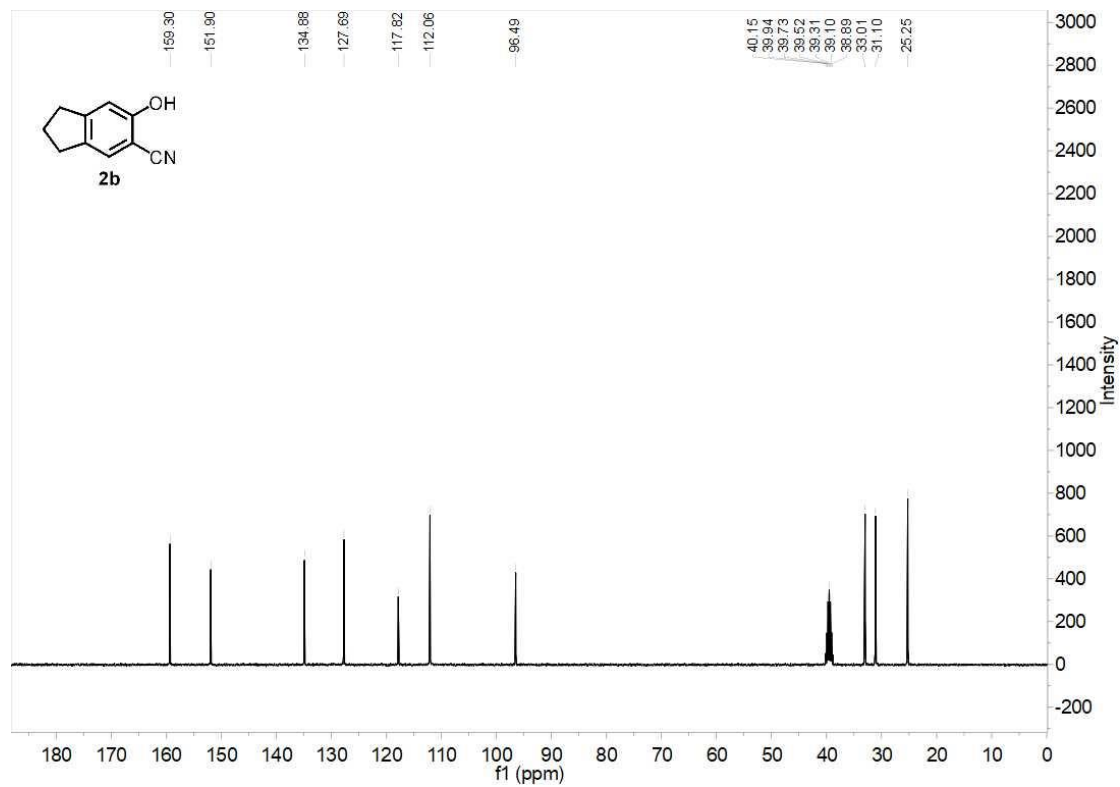

<sup>1</sup>H NMR spectrum of **2c** (400 MHz, DMSO-*d*<sub>6</sub>)

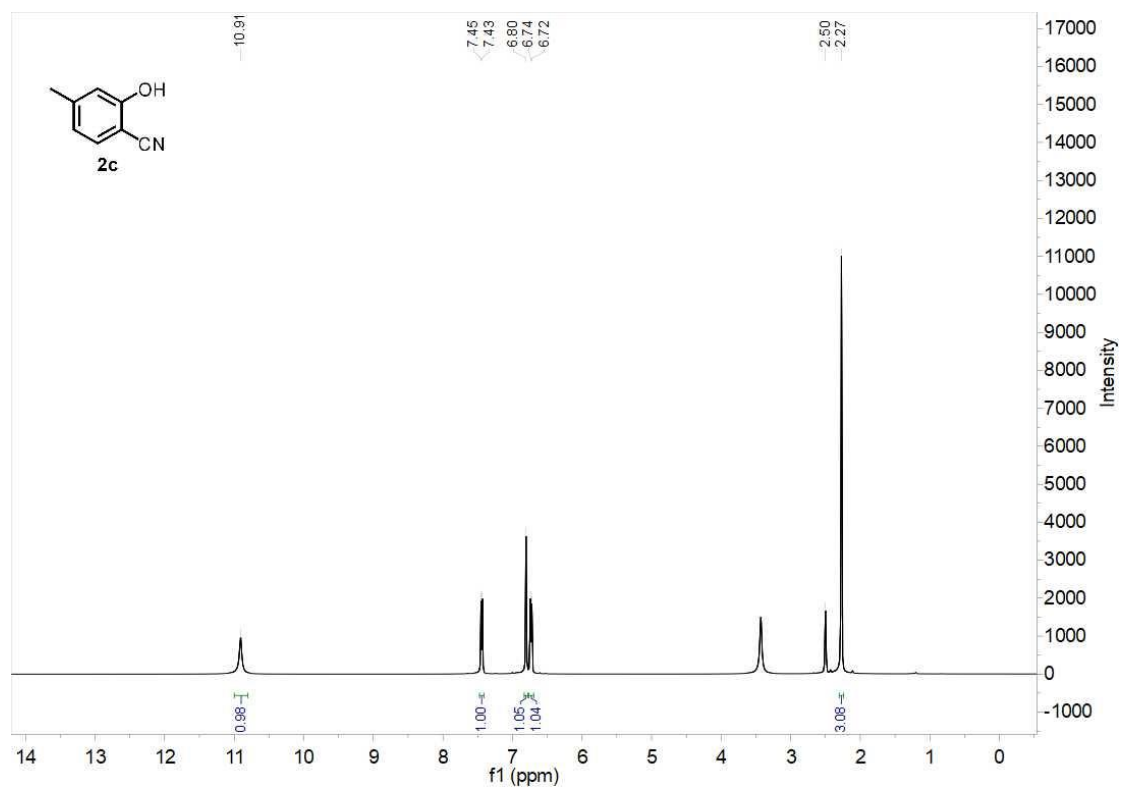

<sup>13</sup>C NMR spectrum of **2c** (100 MHz, DMSO-*d*<sub>6</sub>)

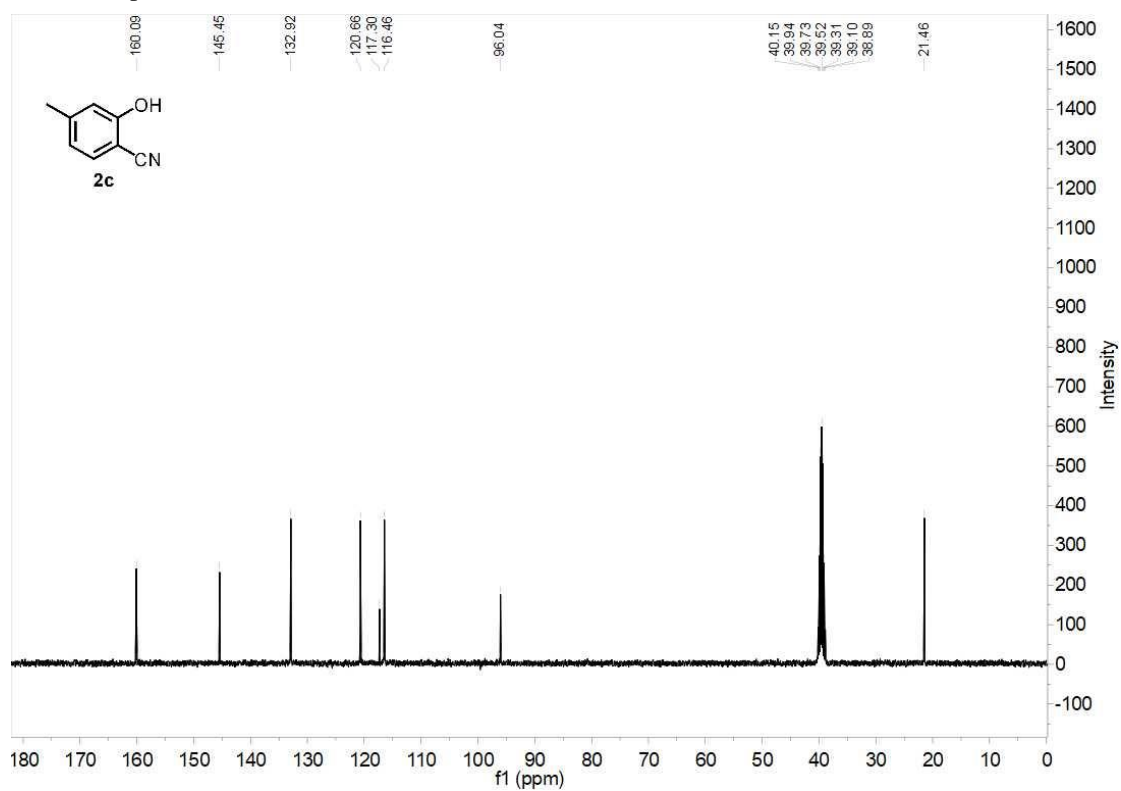

<sup>1</sup>H NMR spectrum of **2d** (400 MHz, DMSO-*d*<sub>6</sub>)

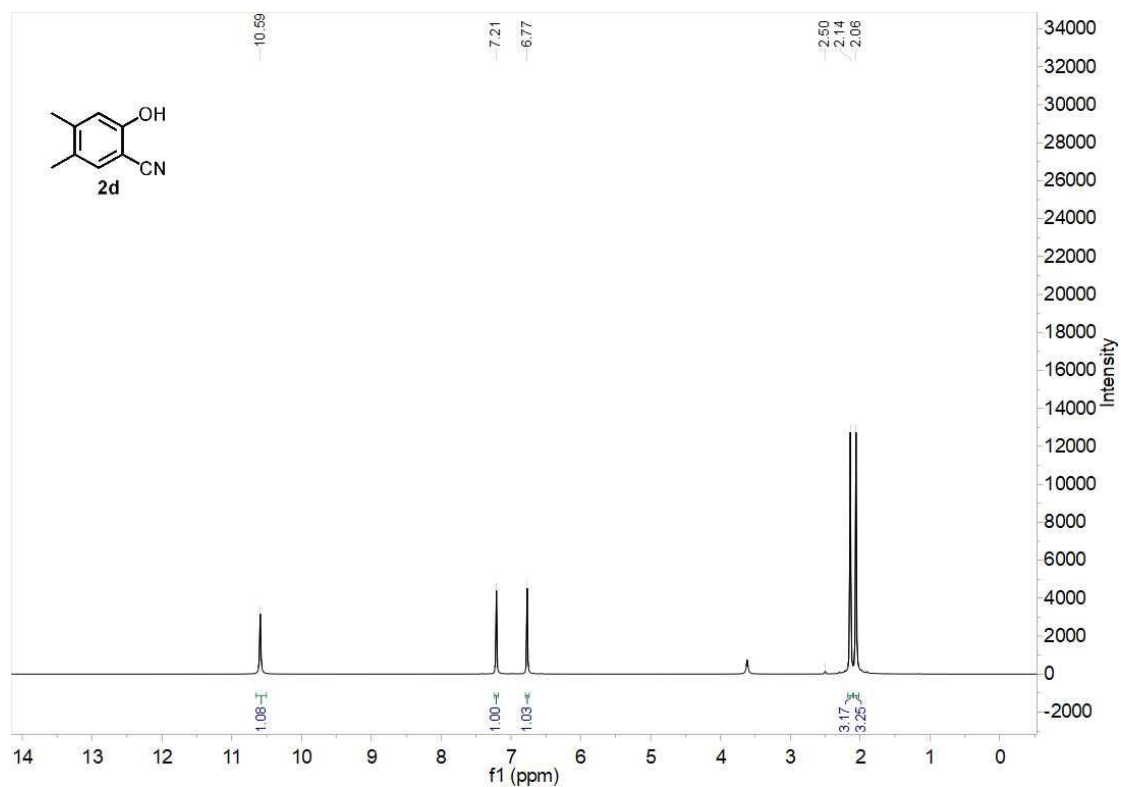

<sup>13</sup>C NMR spectrum of **2d** (100 MHz, DMSO-*d*<sub>6</sub>)

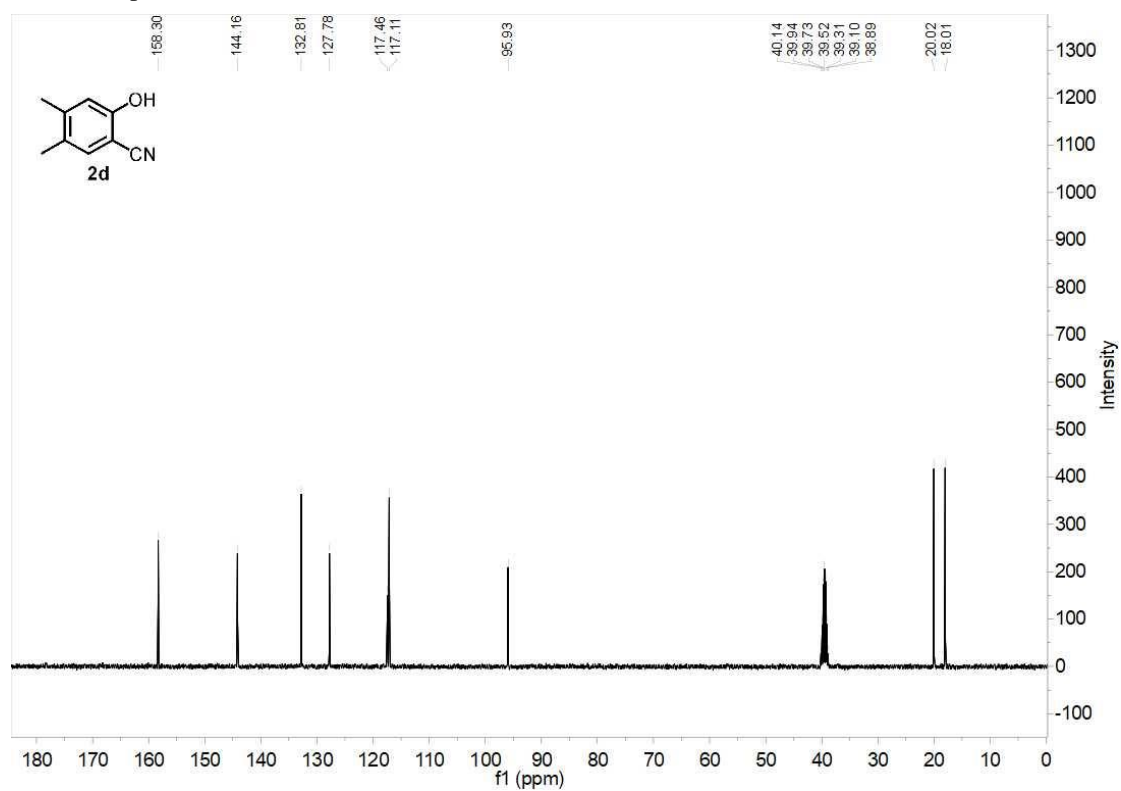

$^1\text{H}$  NMR spectrum of **2e** (400 MHz,  $\text{DMSO-}d_6$ )

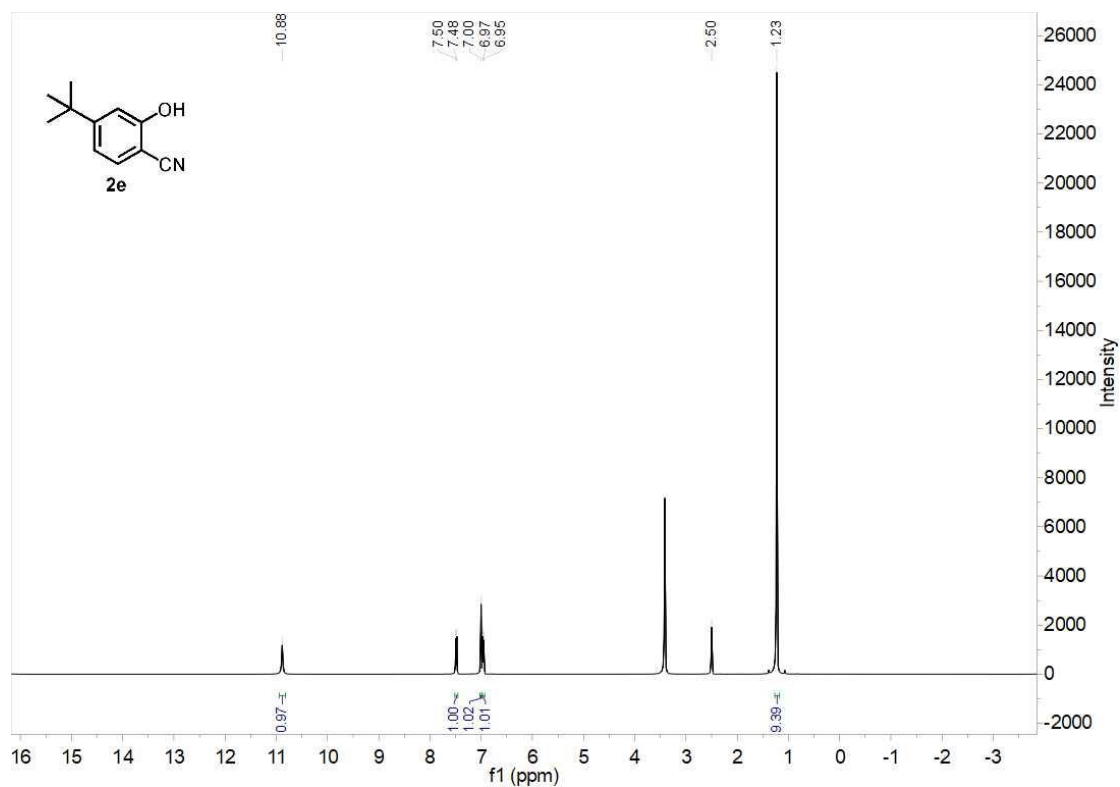

$^{13}\text{C}$  NMR spectrum of **2e** (100 MHz,  $\text{DMSO-}d_6$ )

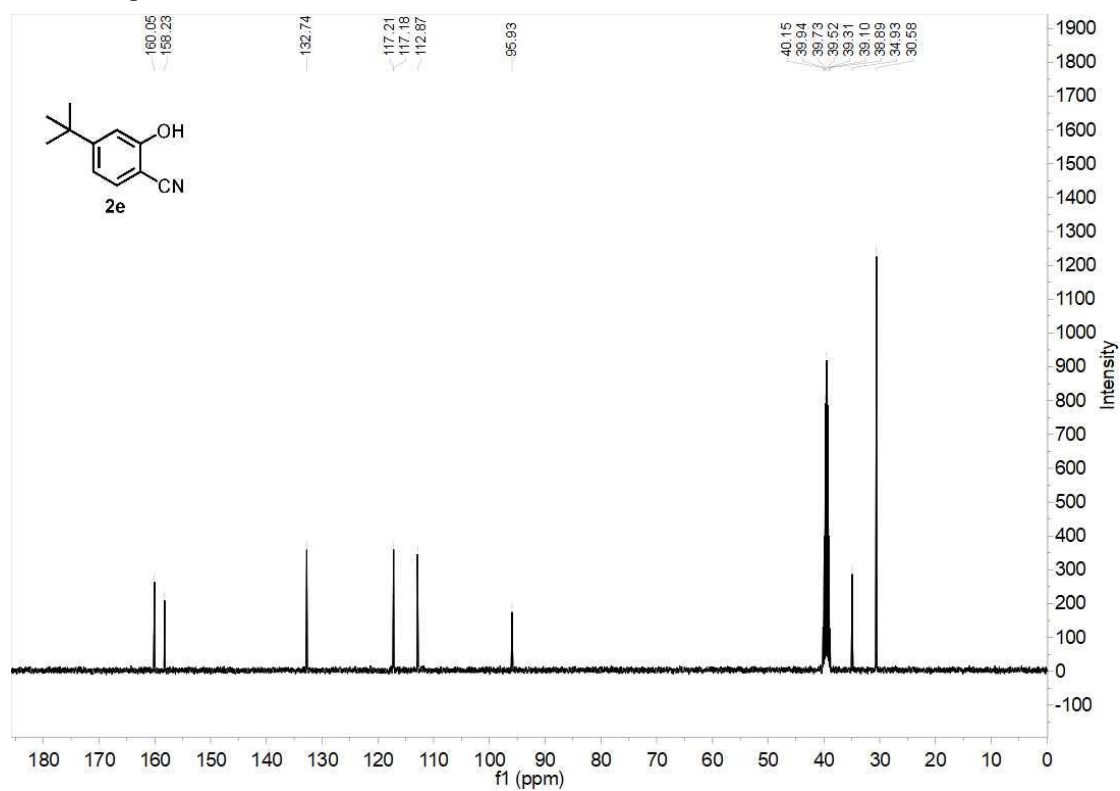



$^1\text{H}$  NMR spectrum of **2f** (400 MHz,  $\text{DMSO-}d_6$ )

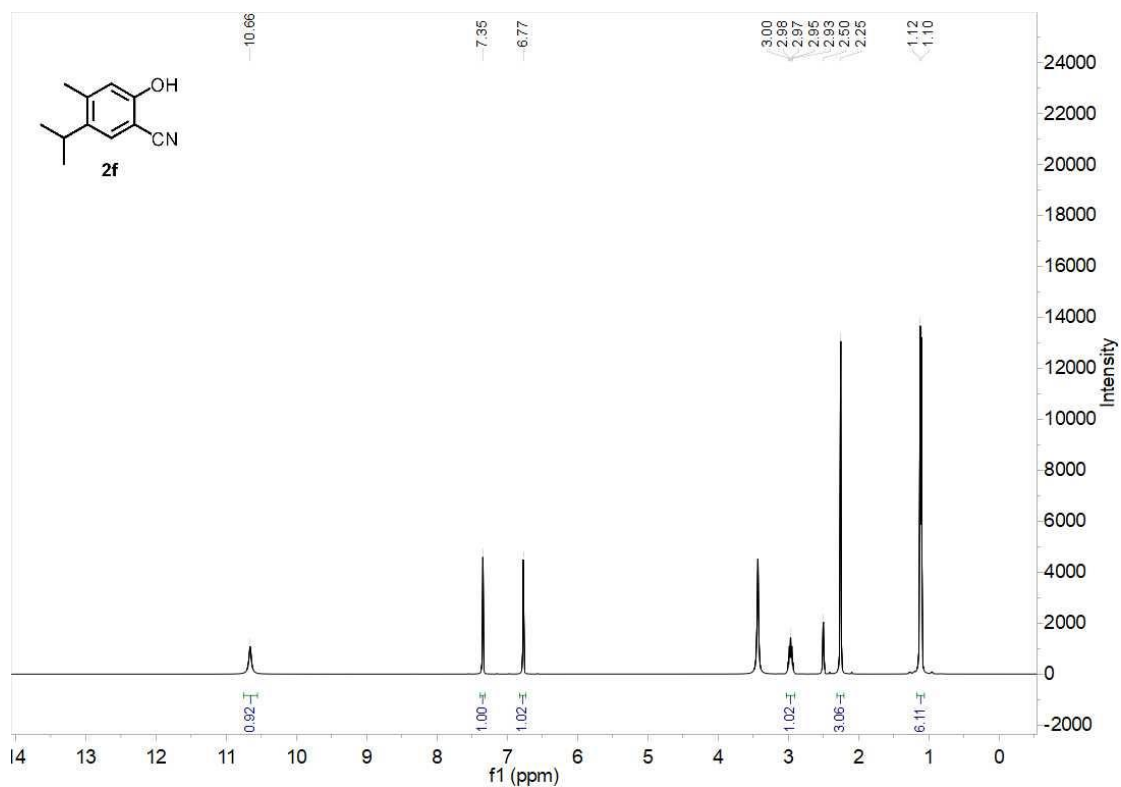

$^{13}\text{C}$  NMR spectrum of **2f** (100 MHz,  $\text{DMSO-}d_6$ )

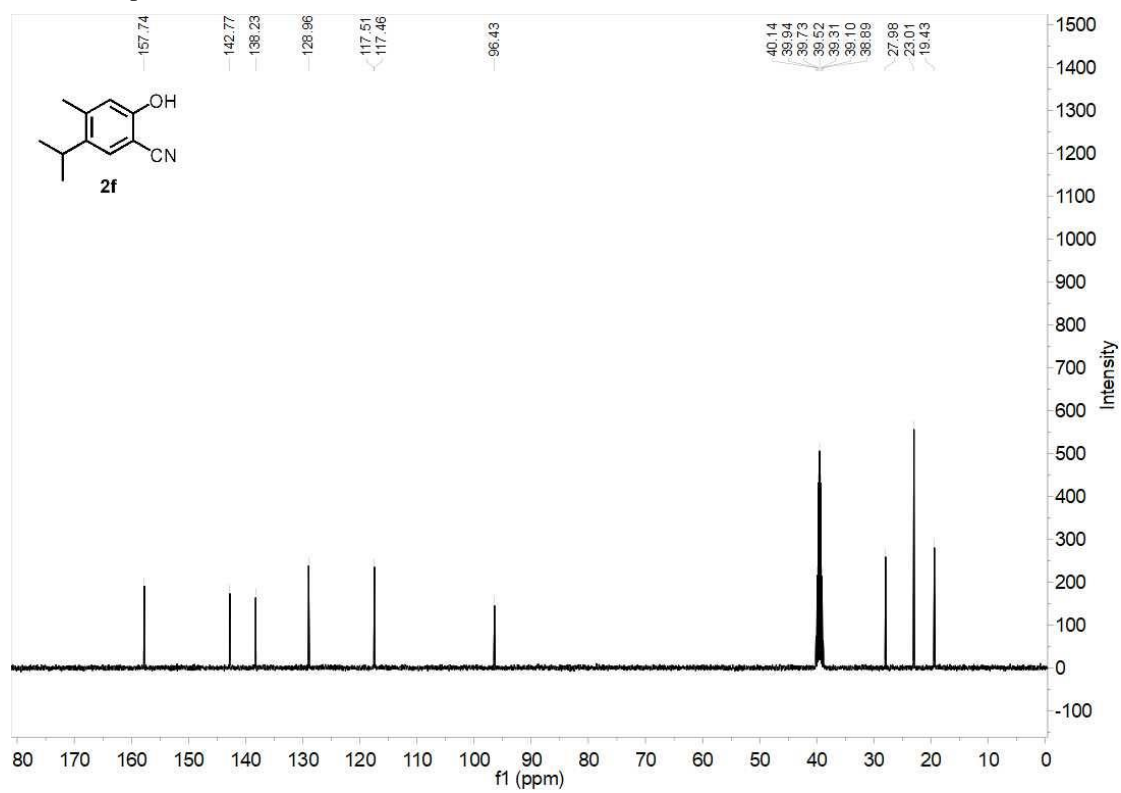

$^1\text{H}$  NMR spectrum of **2g** (400 MHz,  $\text{DMSO-}d_6$ )

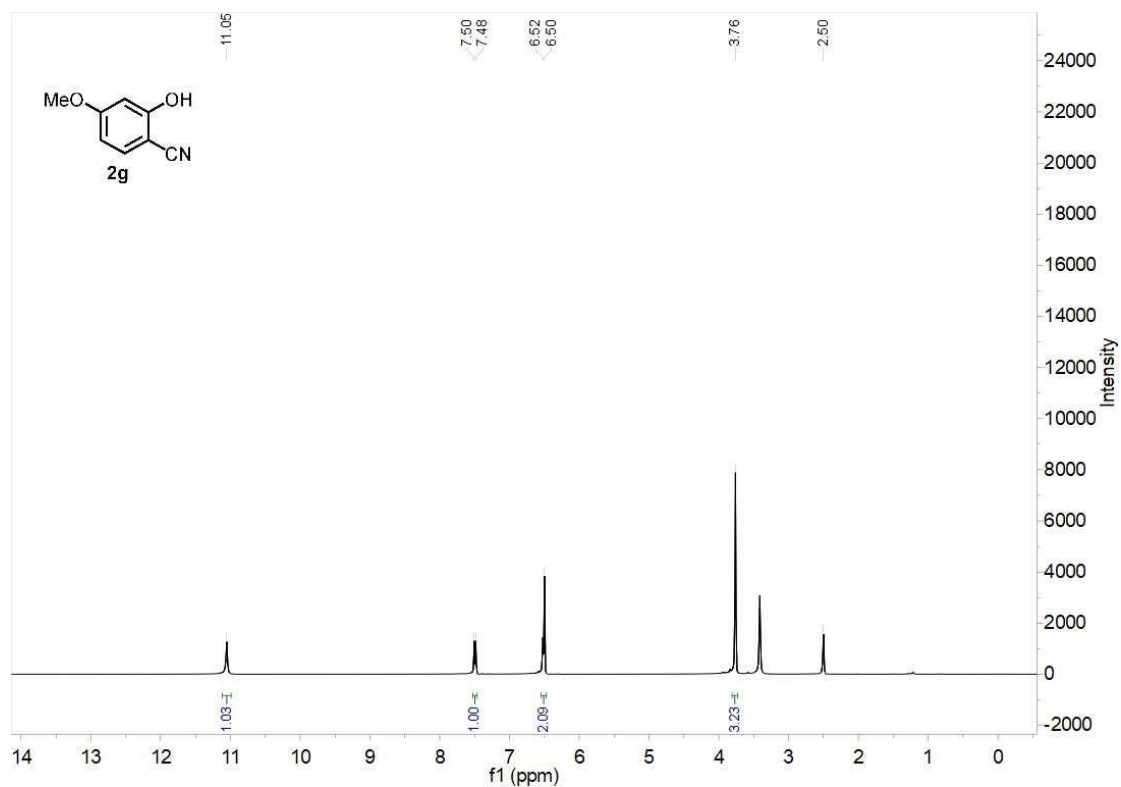

$^{13}\text{C}$  NMR spectrum of **2g** (100 MHz,  $\text{DMSO-}d_6$ )

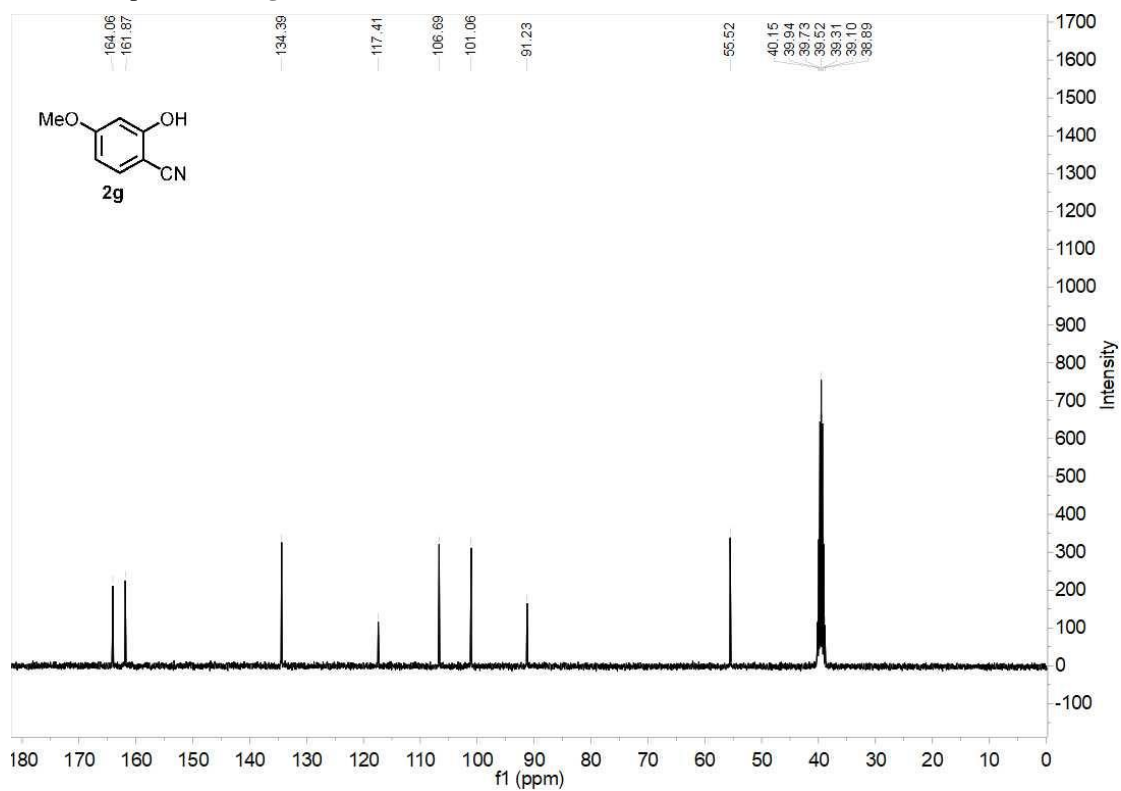

$^1\text{H}$  NMR spectrum of **2h** (400 MHz,  $\text{DMSO-}d_6$ )

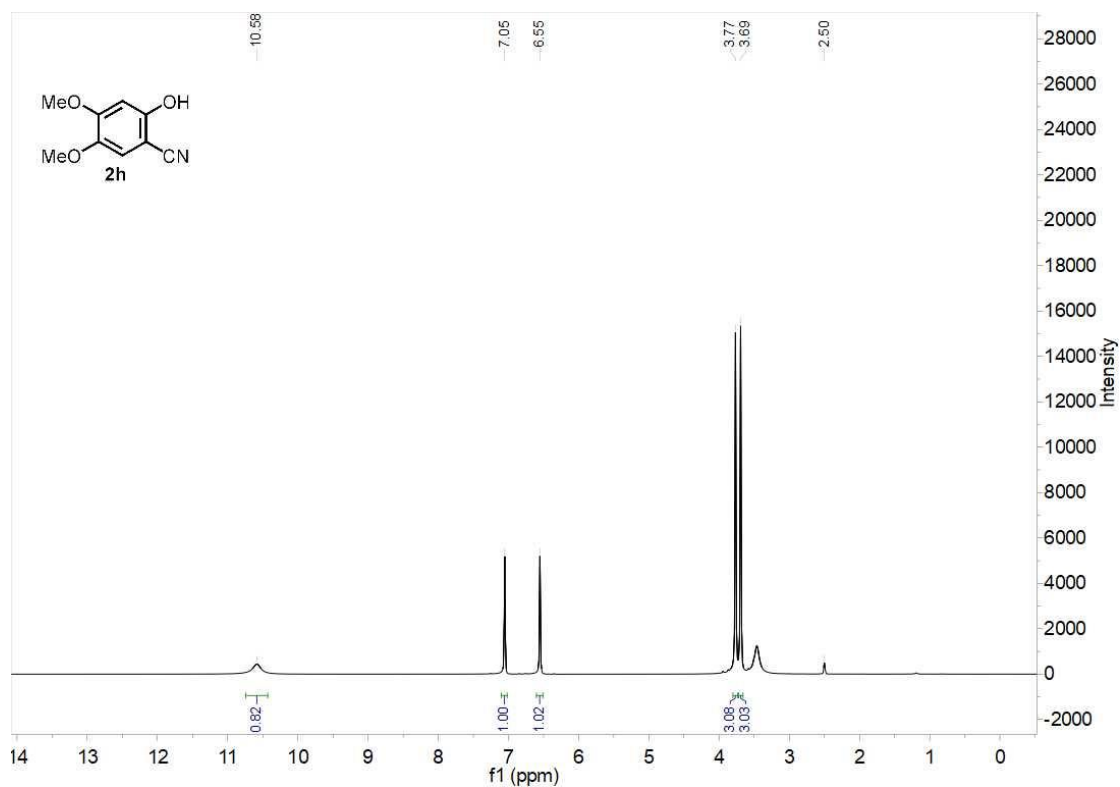

$^{13}\text{C}$  NMR spectrum of **2h** (100 MHz,  $\text{DMSO-}d_6$ )

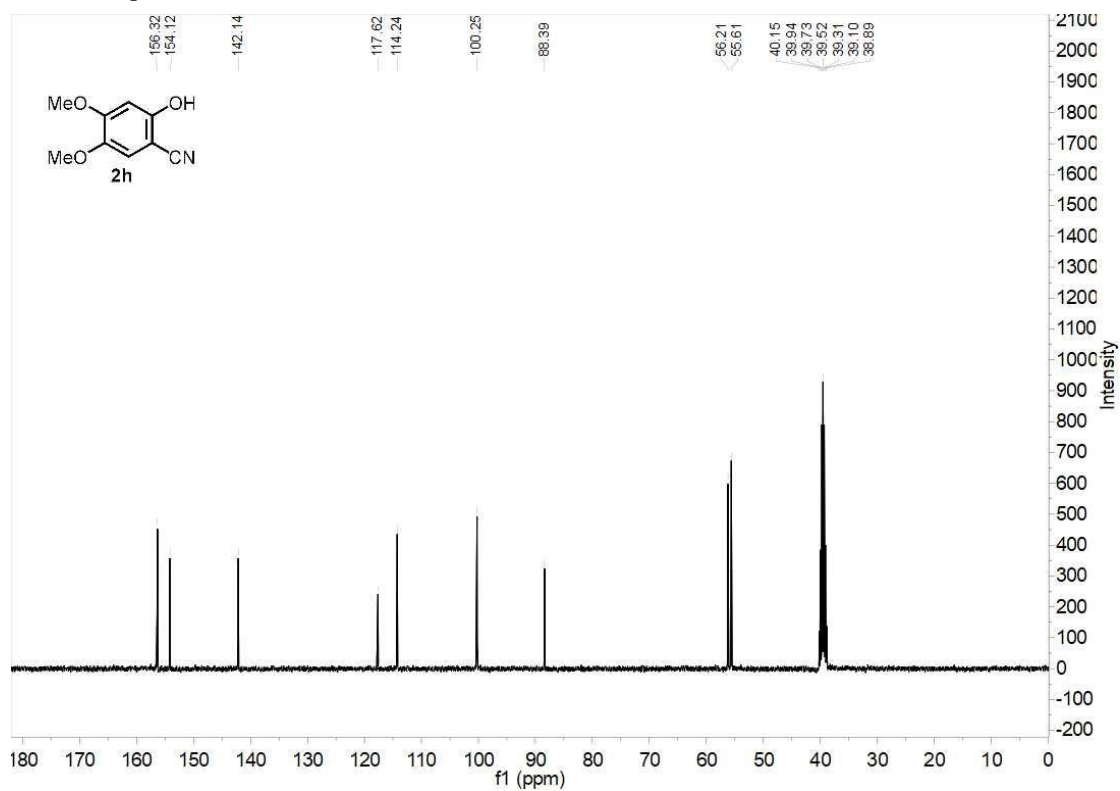

<sup>1</sup>H NMR spectrum of **2i** (400 MHz, DMSO-*d*<sub>6</sub>)

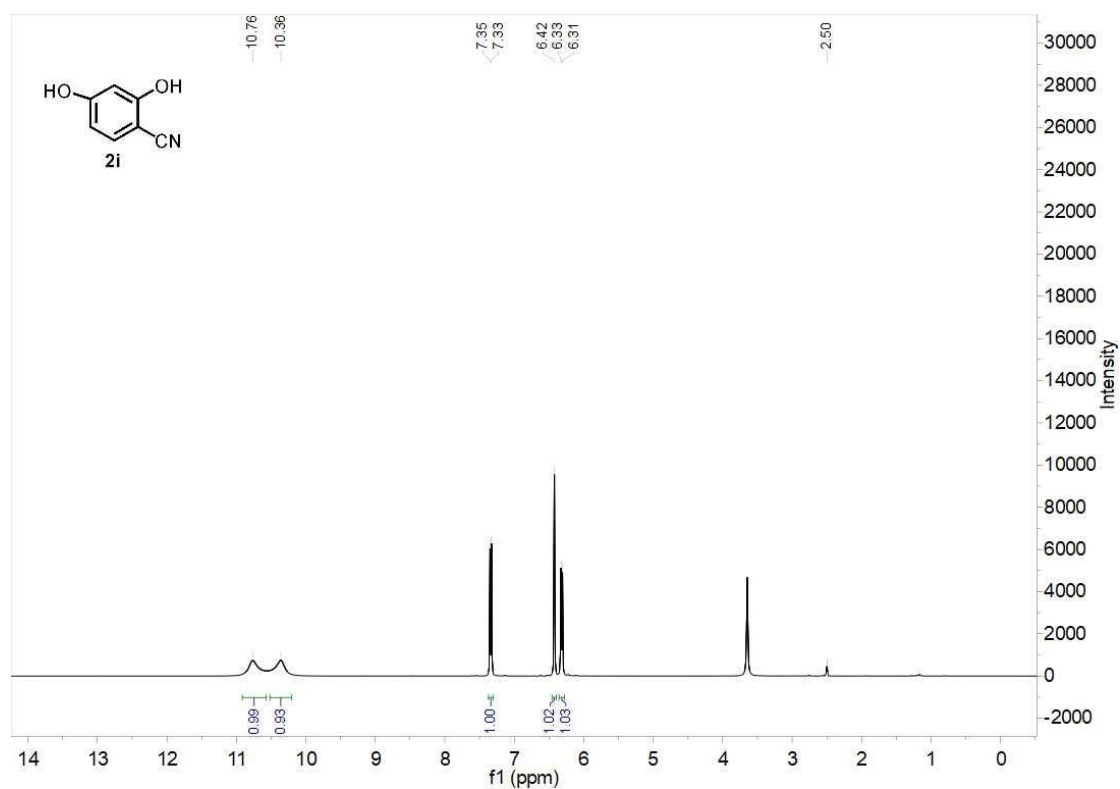

<sup>13</sup>C NMR spectrum of **2i** (100 MHz, DMSO-*d*<sub>6</sub>)

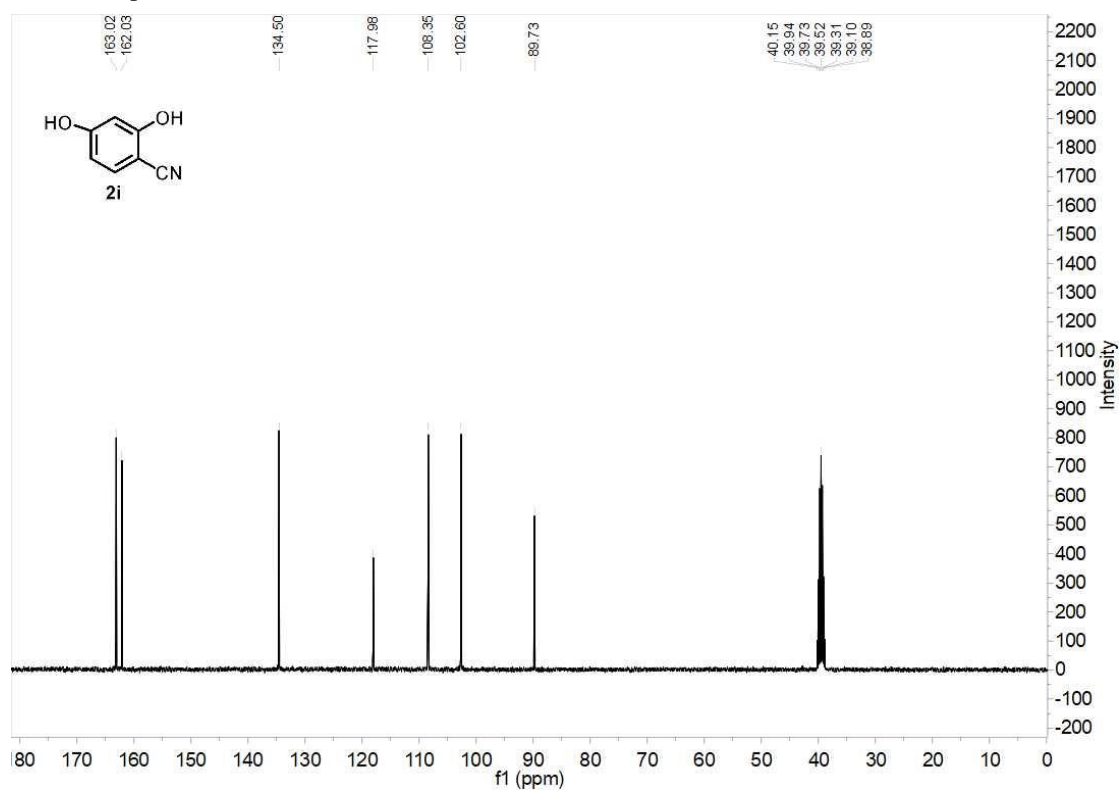

<sup>1</sup>H NMR spectrum of **2j** (400 MHz, CDCl<sub>3</sub>)

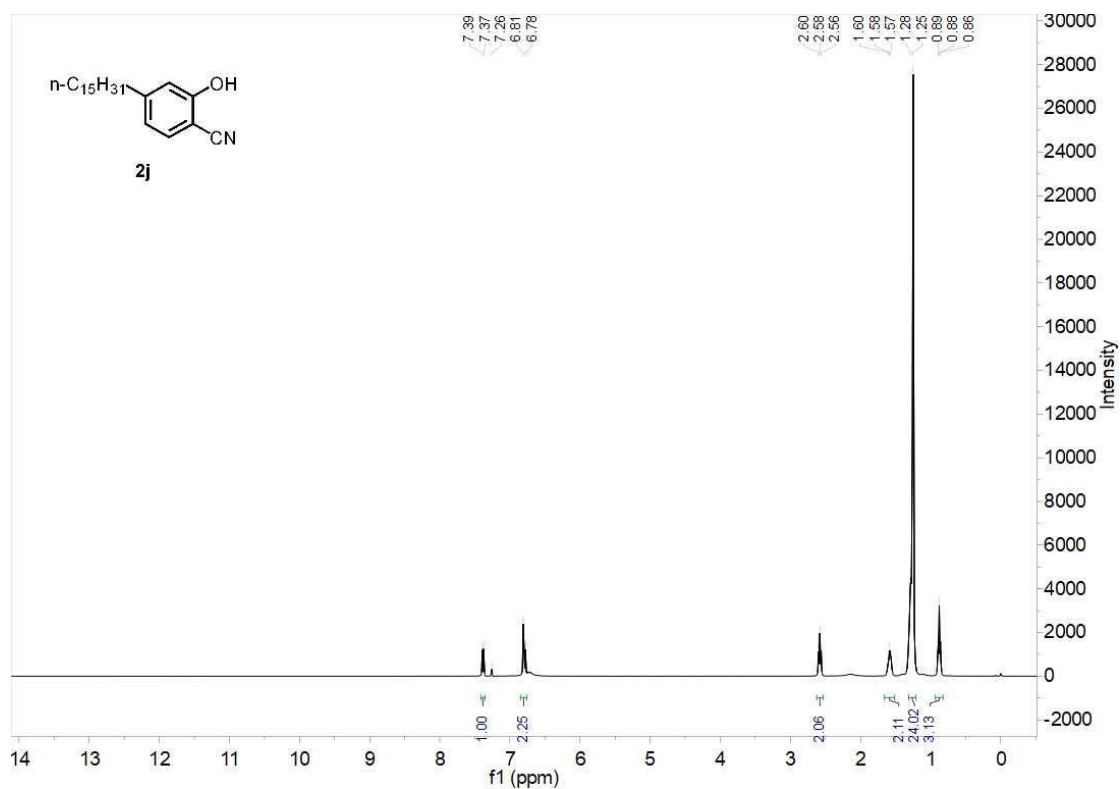

<sup>13</sup>C NMR spectrum of **2j** (100 MHz, CDCl<sub>3</sub>)

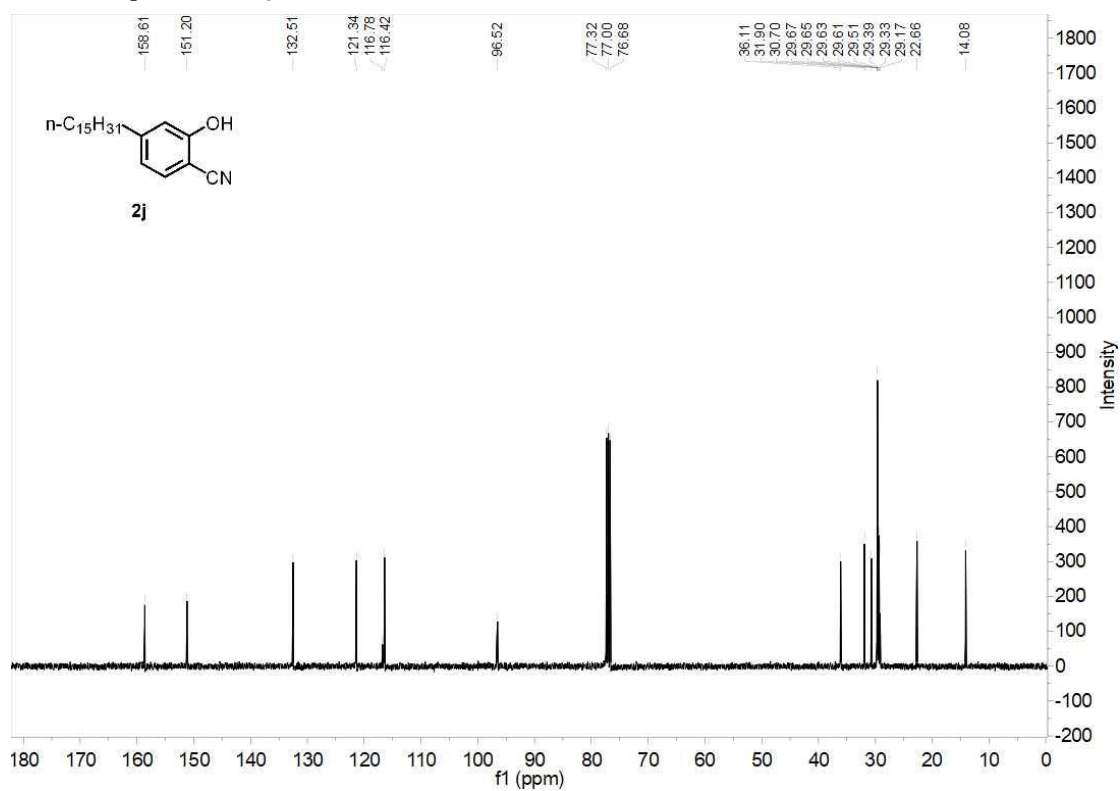

$^1\text{H}$  NMR spectrum of **2i** (400 MHz,  $\text{DMSO-}d_6$ )

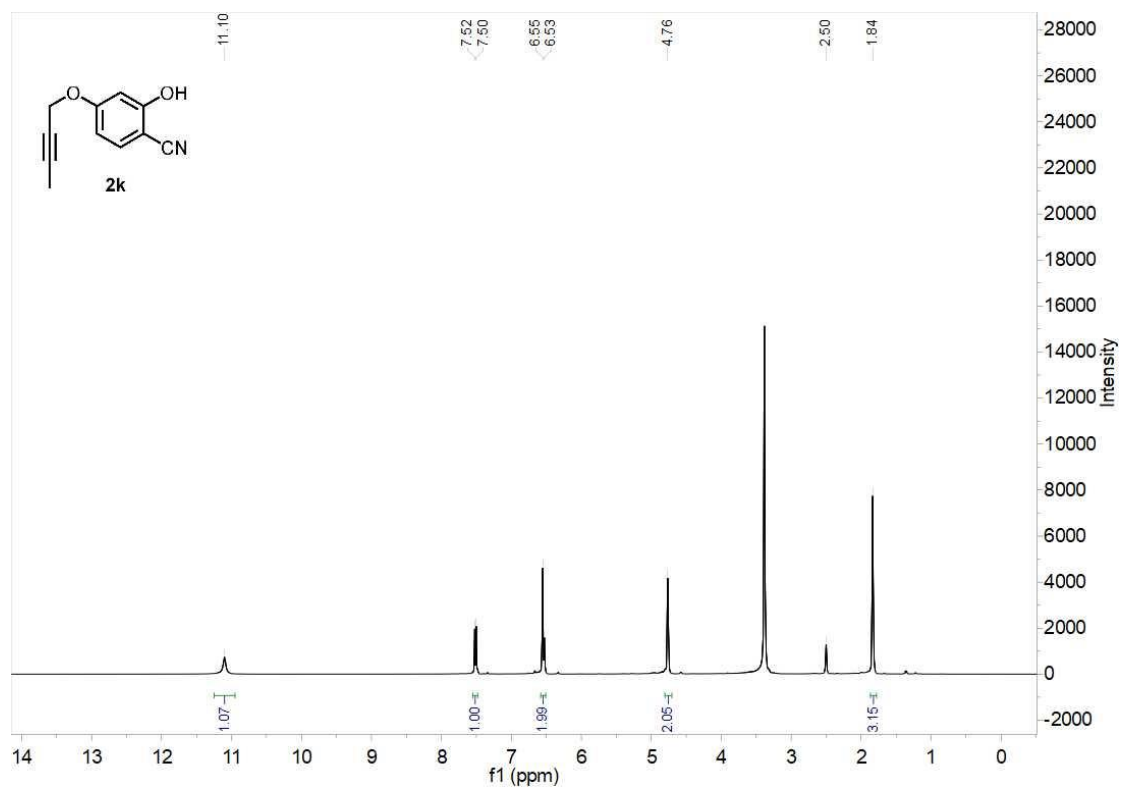

$^{13}\text{C}$  NMR spectrum of **2k** (100 MHz,  $\text{DMSO-}d_6$ )

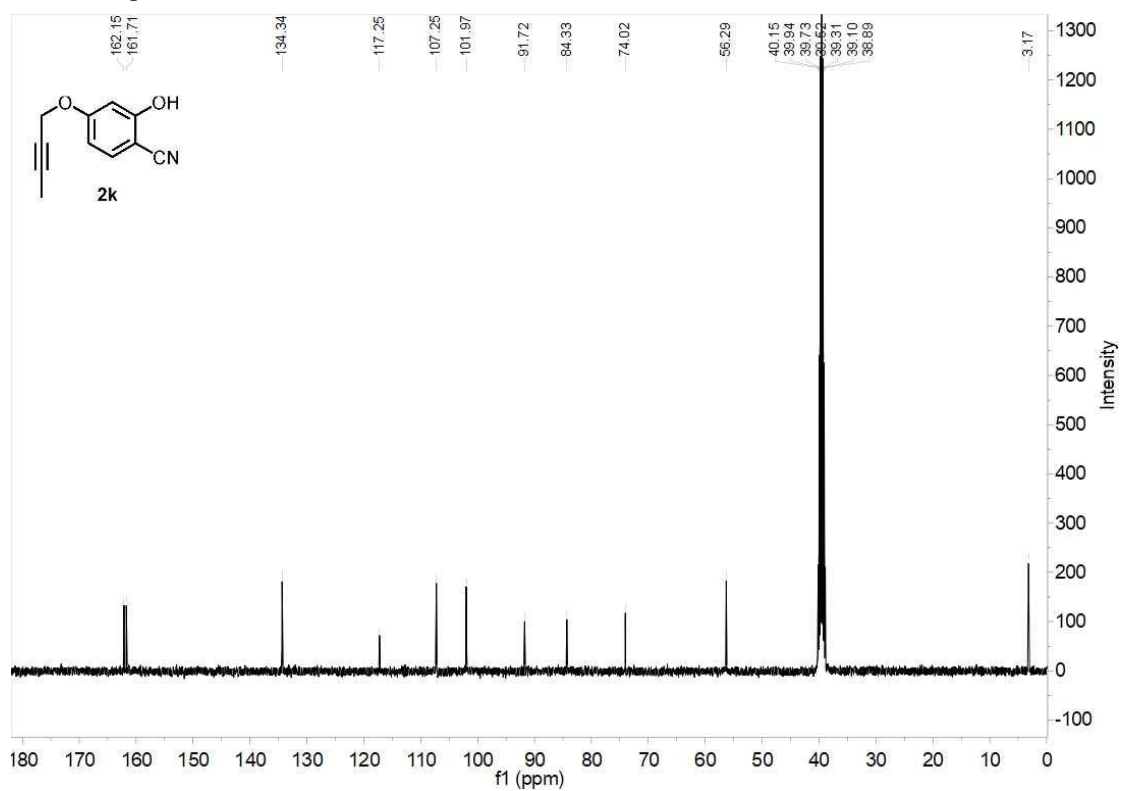

<sup>1</sup>H NMR spectrum of **21** (400 MHz, DMSO-*d*<sub>6</sub>)

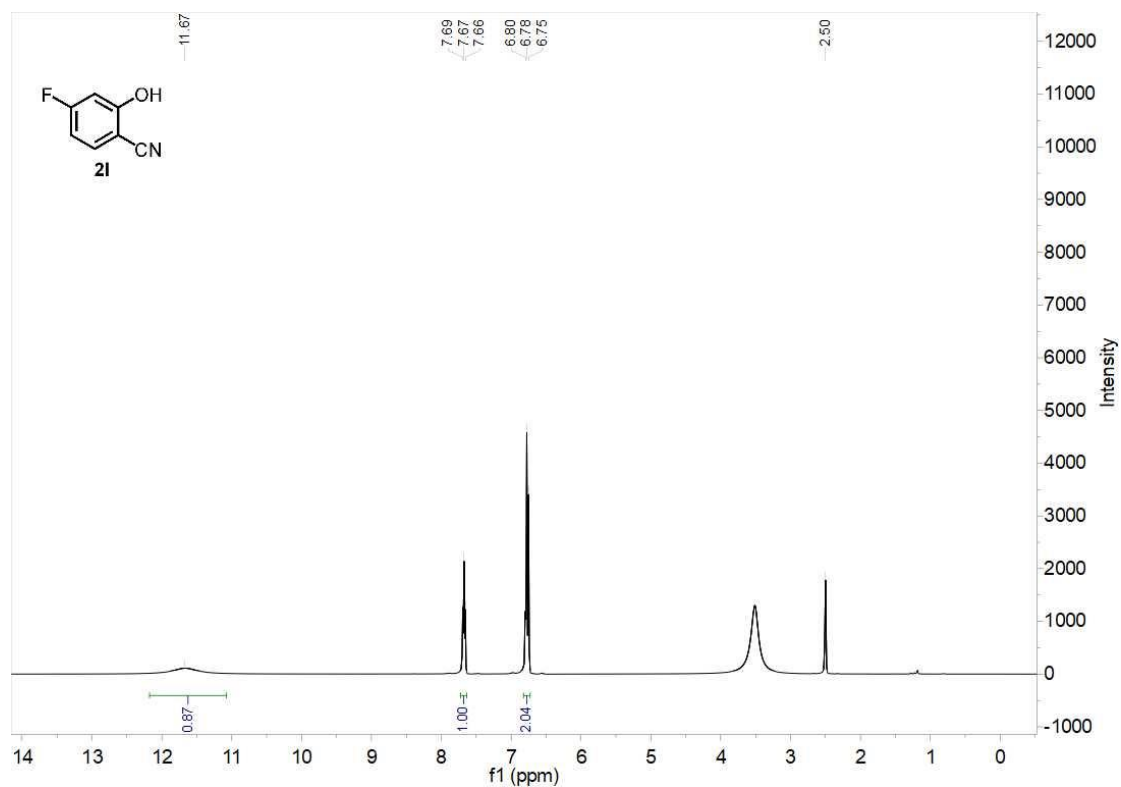

<sup>13</sup>C NMR spectrum of **21** (100 MHz, DMSO-*d*<sub>6</sub>)

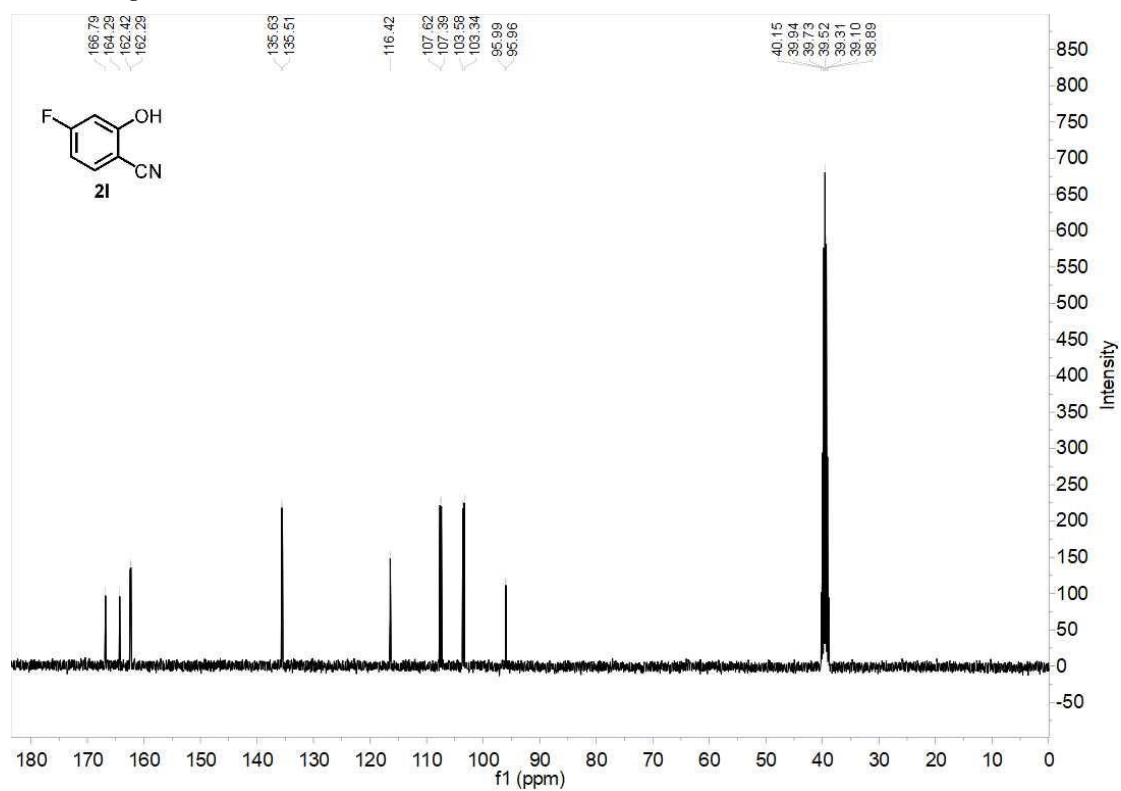

<sup>1</sup>H NMR spectrum of **2m** (400 MHz, DMSO-*d*<sub>6</sub>)

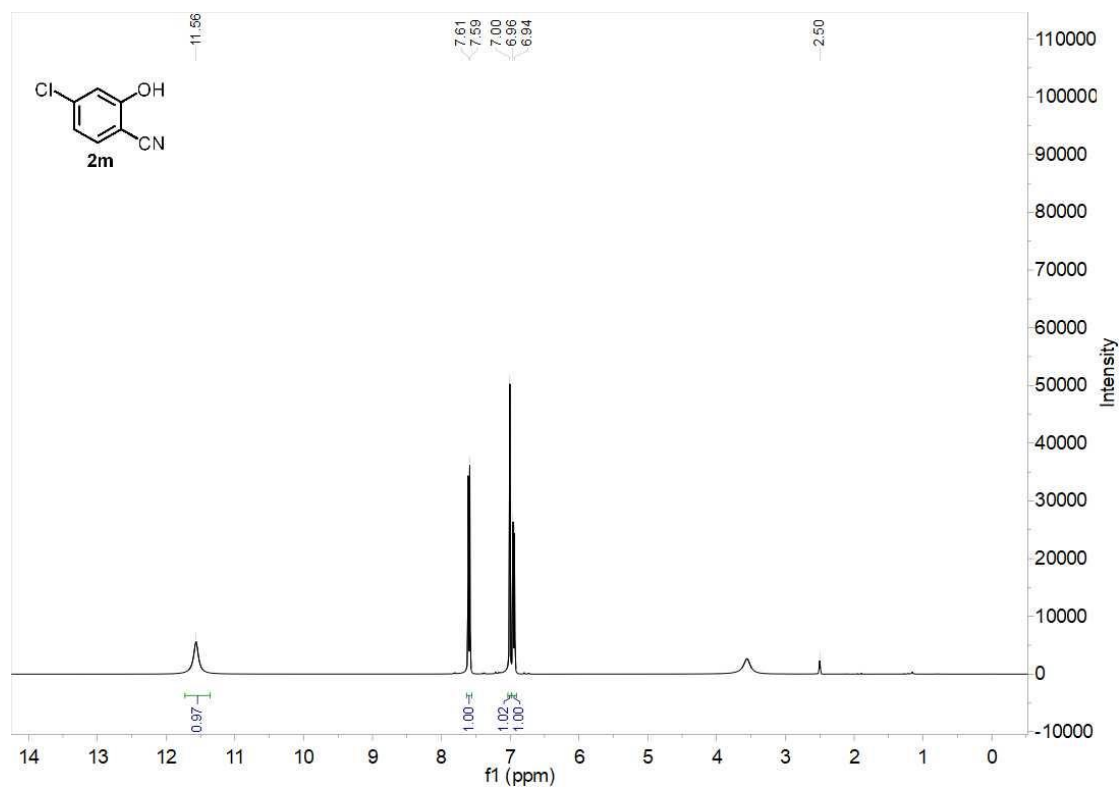

<sup>13</sup>C NMR spectrum of **2m** (100 MHz, DMSO-*d*<sub>6</sub>)

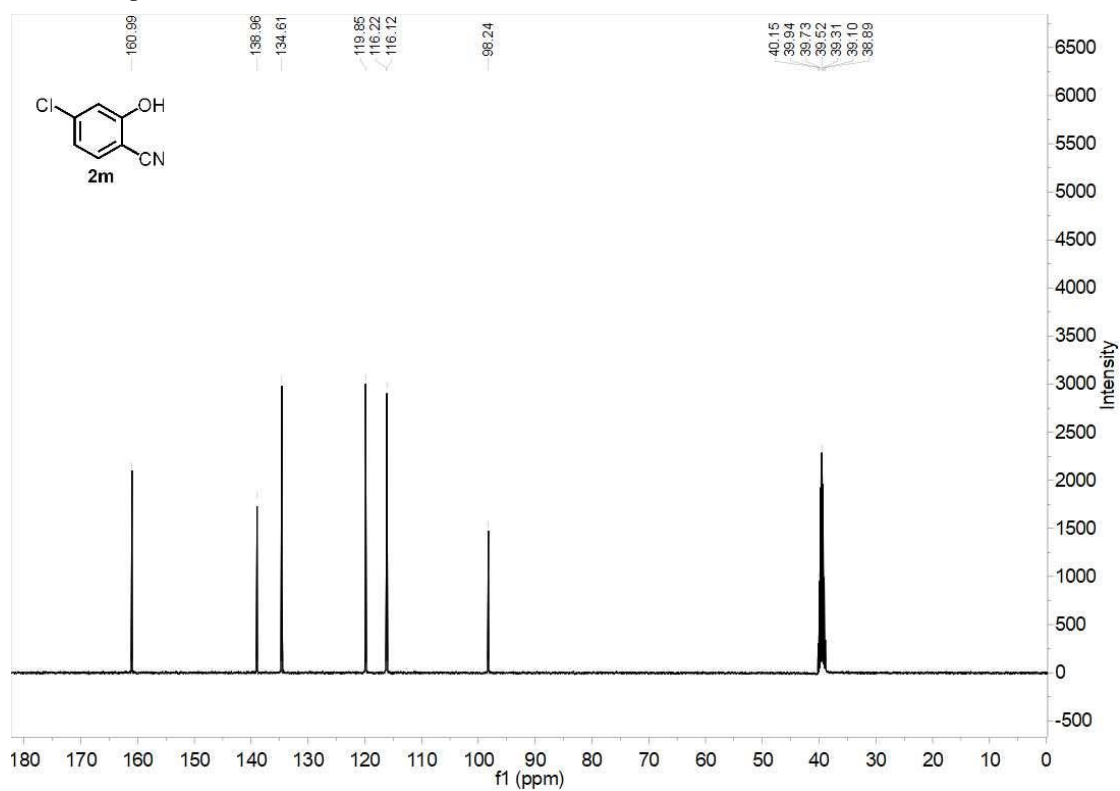



<sup>1</sup>H NMR spectrum of **2n** (400 MHz, DMSO-*d*<sub>6</sub>)

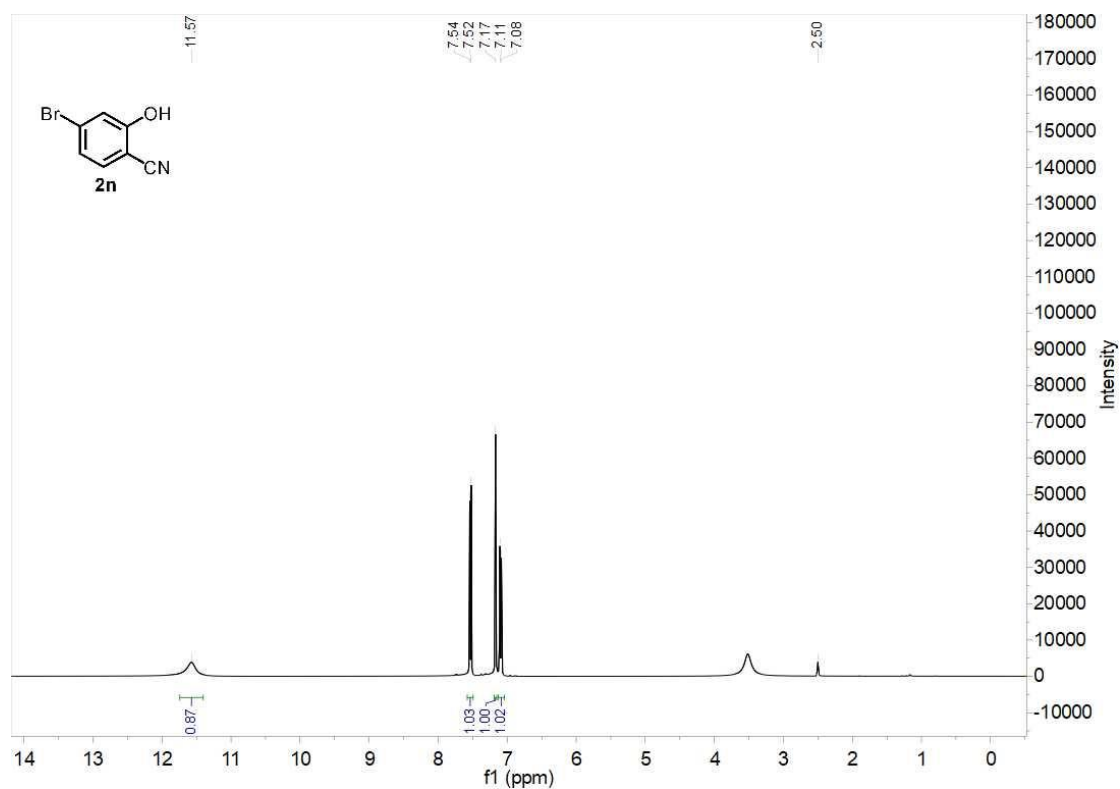

<sup>13</sup>C NMR spectrum of **2n** (100 MHz, DMSO-*d*<sub>6</sub>)

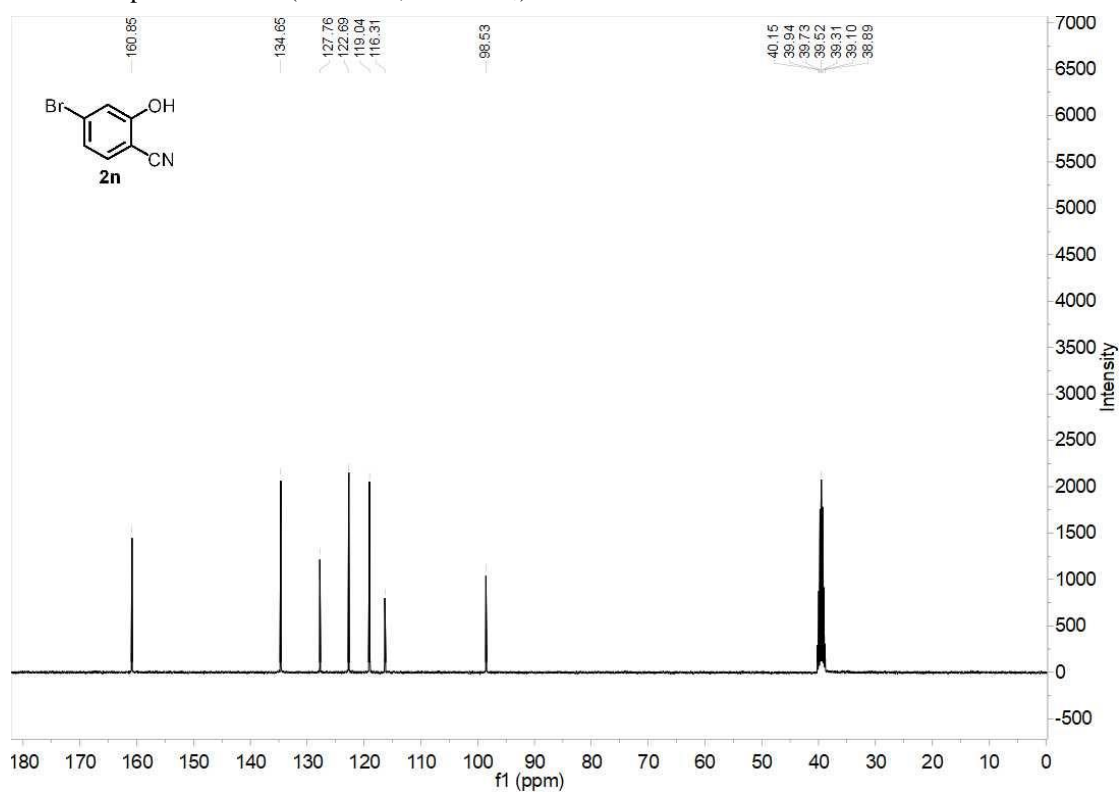

<sup>1</sup>H NMR spectrum of **2o** (400 MHz, DMSO-*d*<sub>6</sub>)

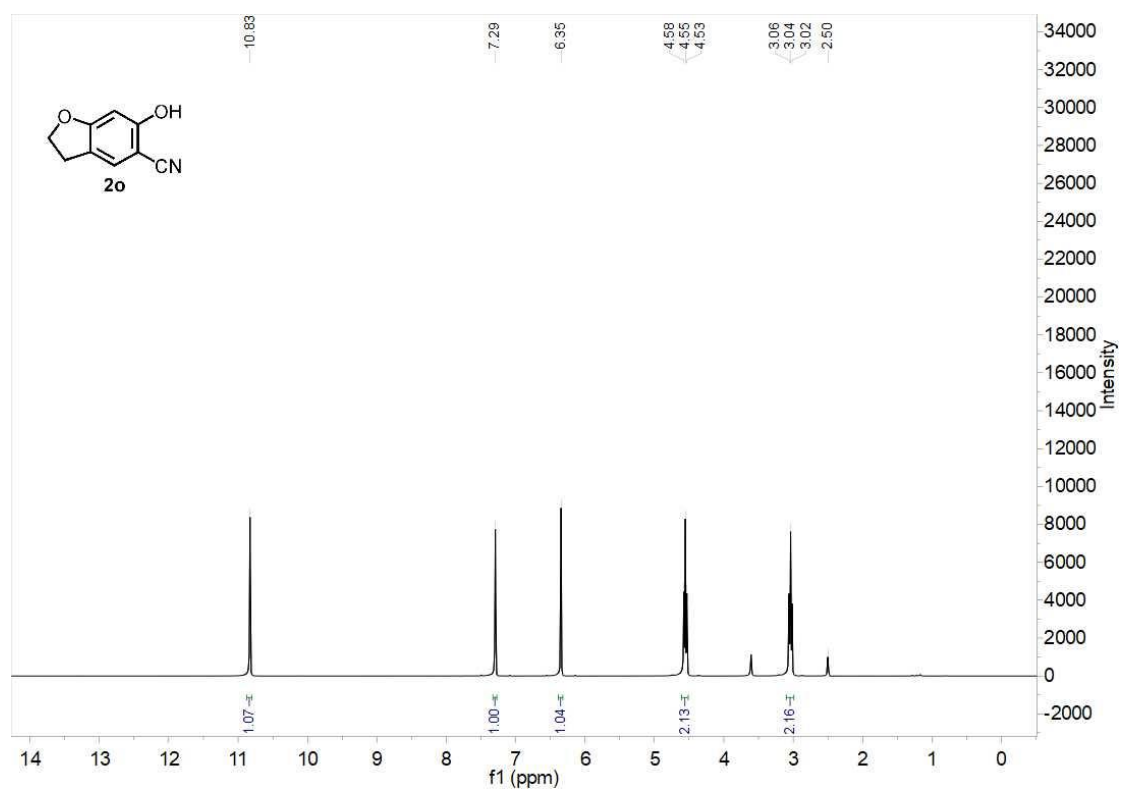

<sup>13</sup>C NMR spectrum of **2o** (100 MHz, DMSO-*d*<sub>6</sub>)

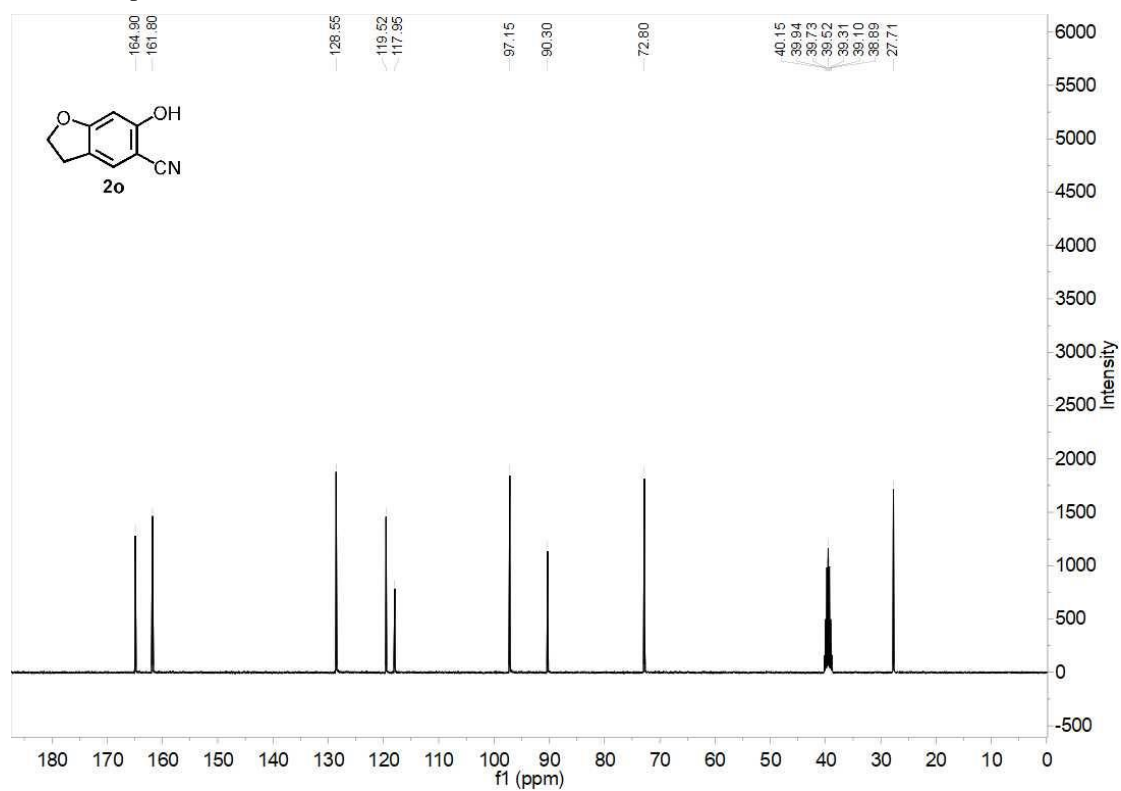

$^1\text{H}$  NMR spectrum of **2p** (400 MHz,  $\text{DMSO-}d_6$ )

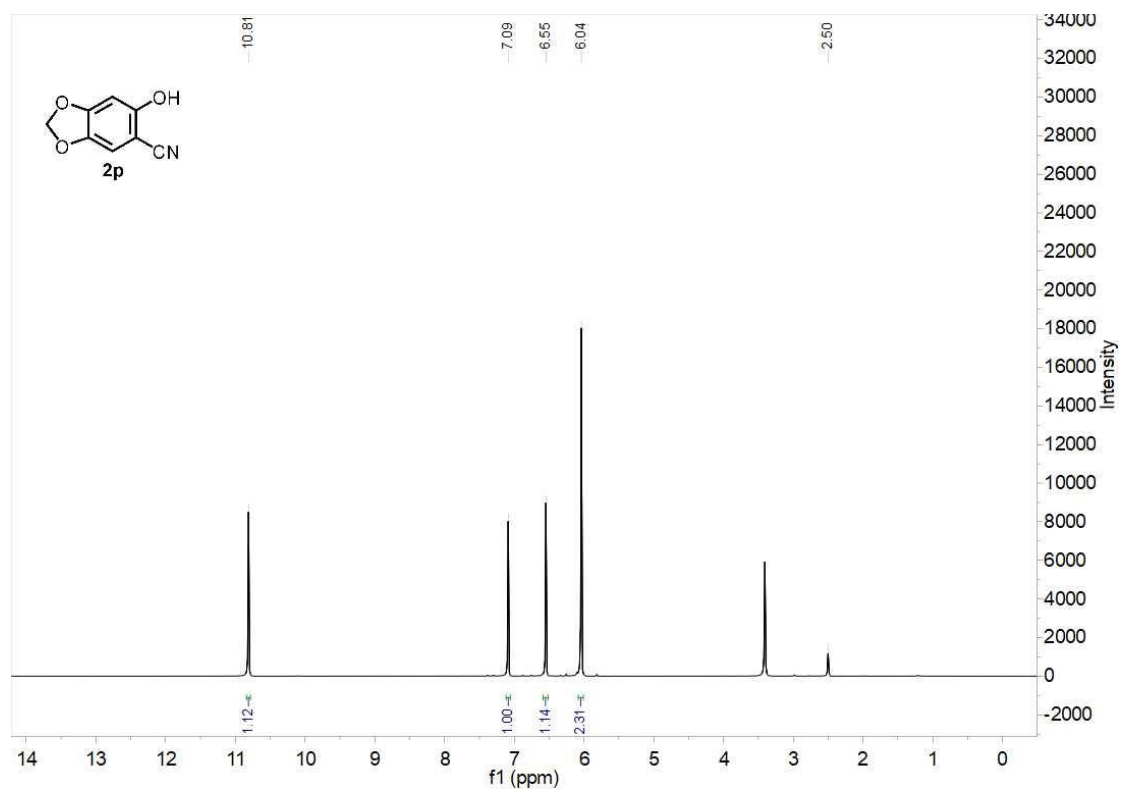

$^{13}\text{C}$  NMR spectrum of **2p** (100 MHz,  $\text{DMSO-}d_6$ )

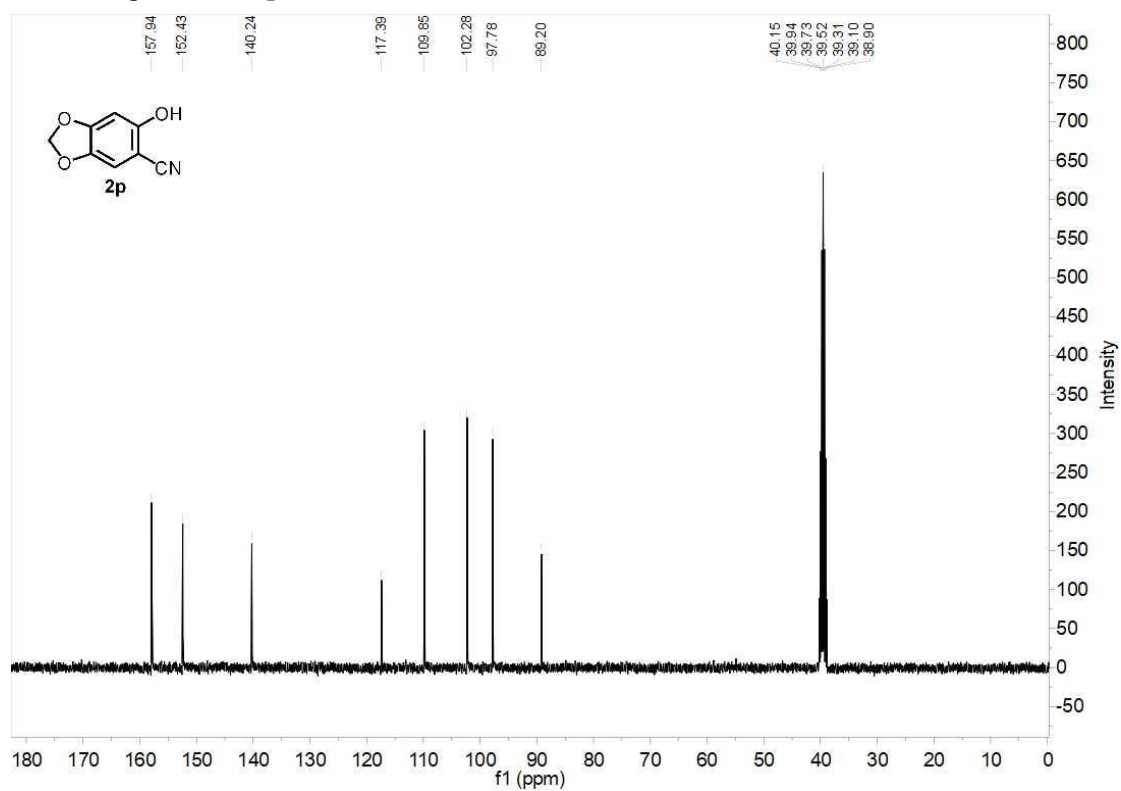

<sup>1</sup>H NMR spectrum of **2q** (400 MHz, DMSO-*d*<sub>6</sub>)

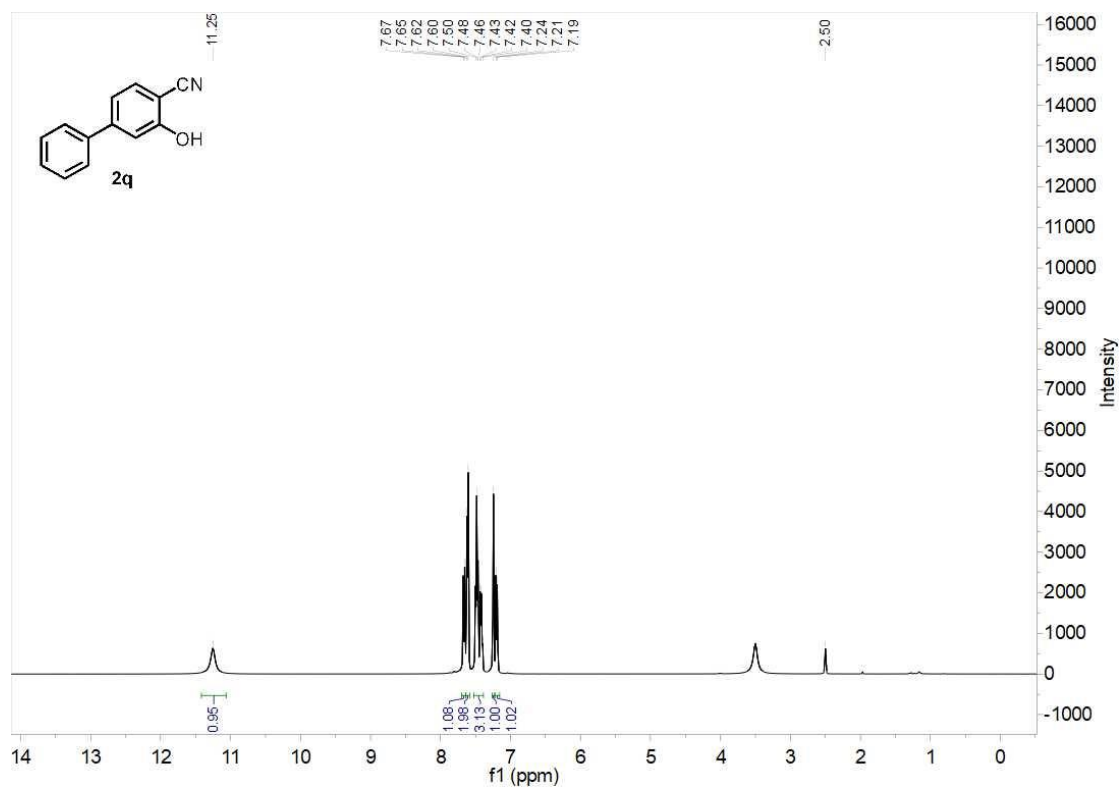

<sup>13</sup>C NMR spectrum of **2q** (100 MHz, DMSO-*d*<sub>6</sub>)

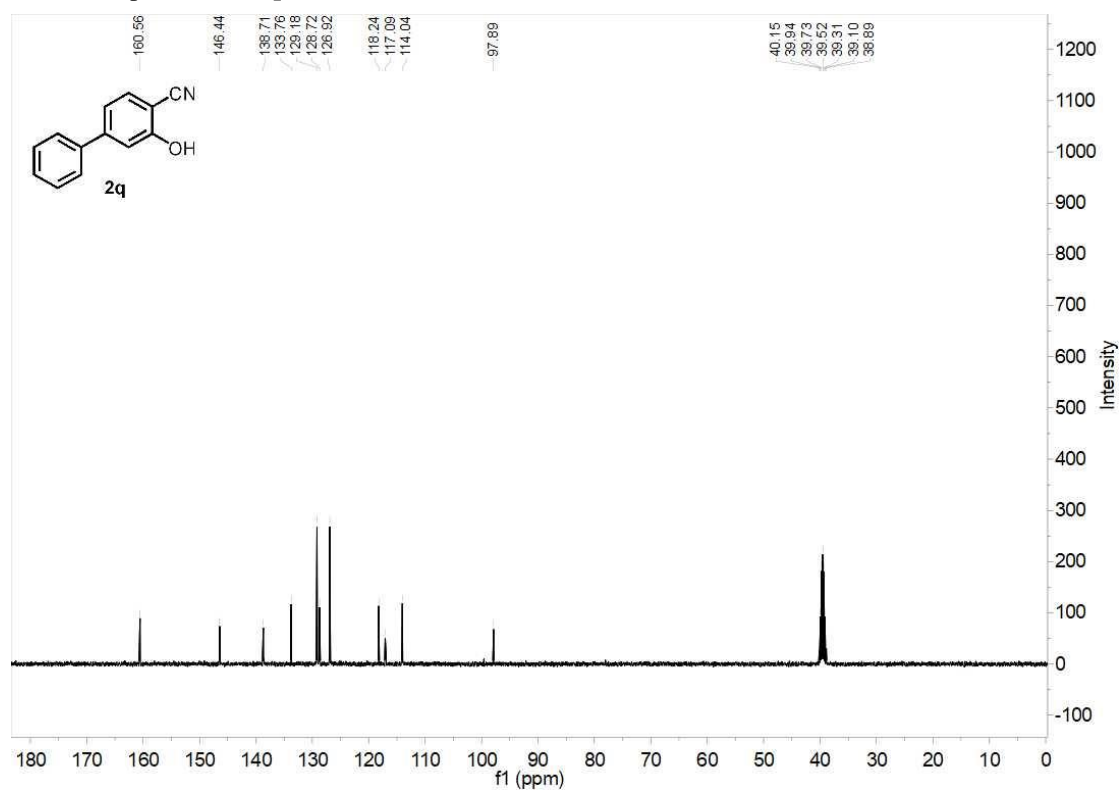

<sup>1</sup>H NMR spectrum of **2r** (400 MHz, DMSO-*d*<sub>6</sub>)

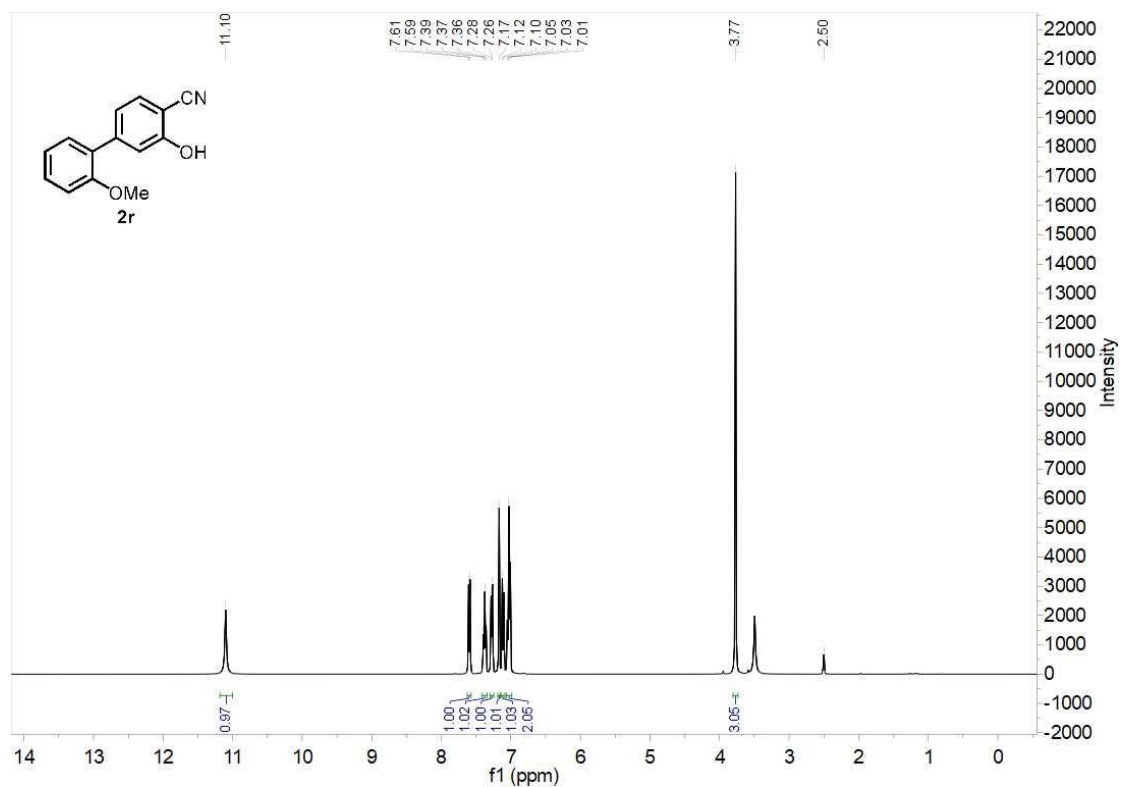

<sup>13</sup>C NMR spectrum of **2r** (100 MHz, DMSO-*d*<sub>6</sub>)

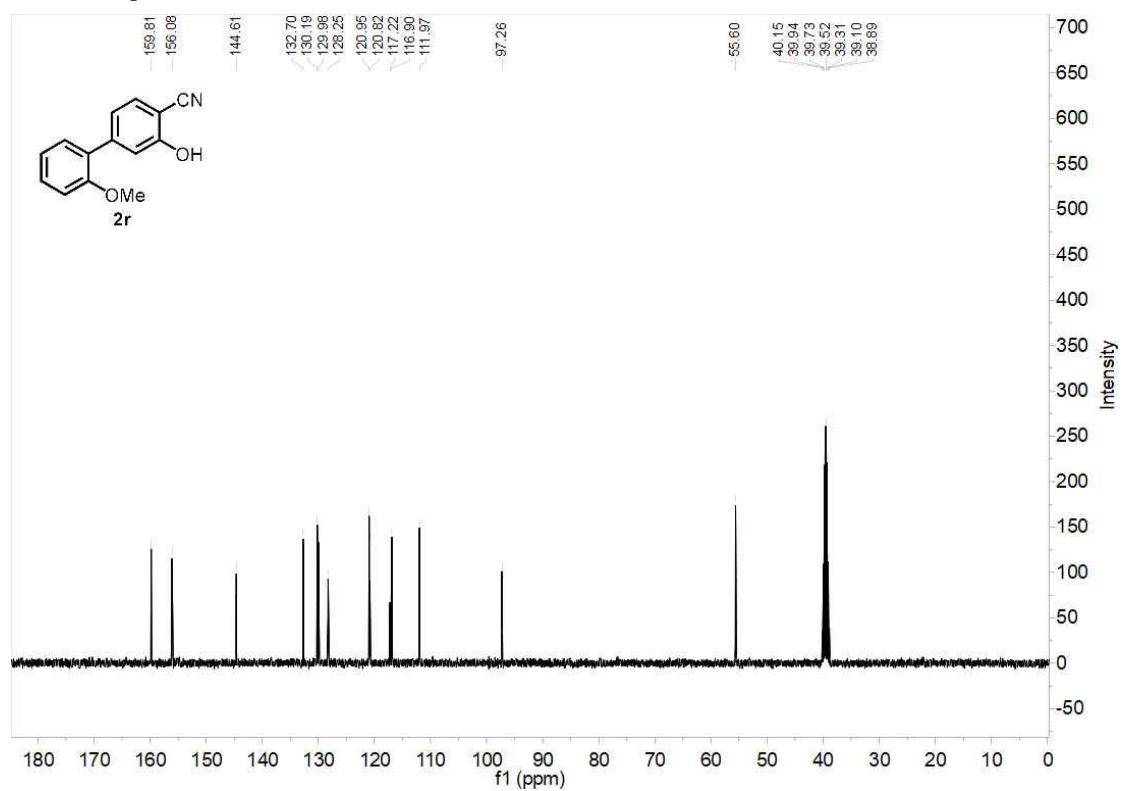

<sup>1</sup>H NMR spectrum of **2s** (400 MHz, DMSO-*d*<sub>6</sub>)

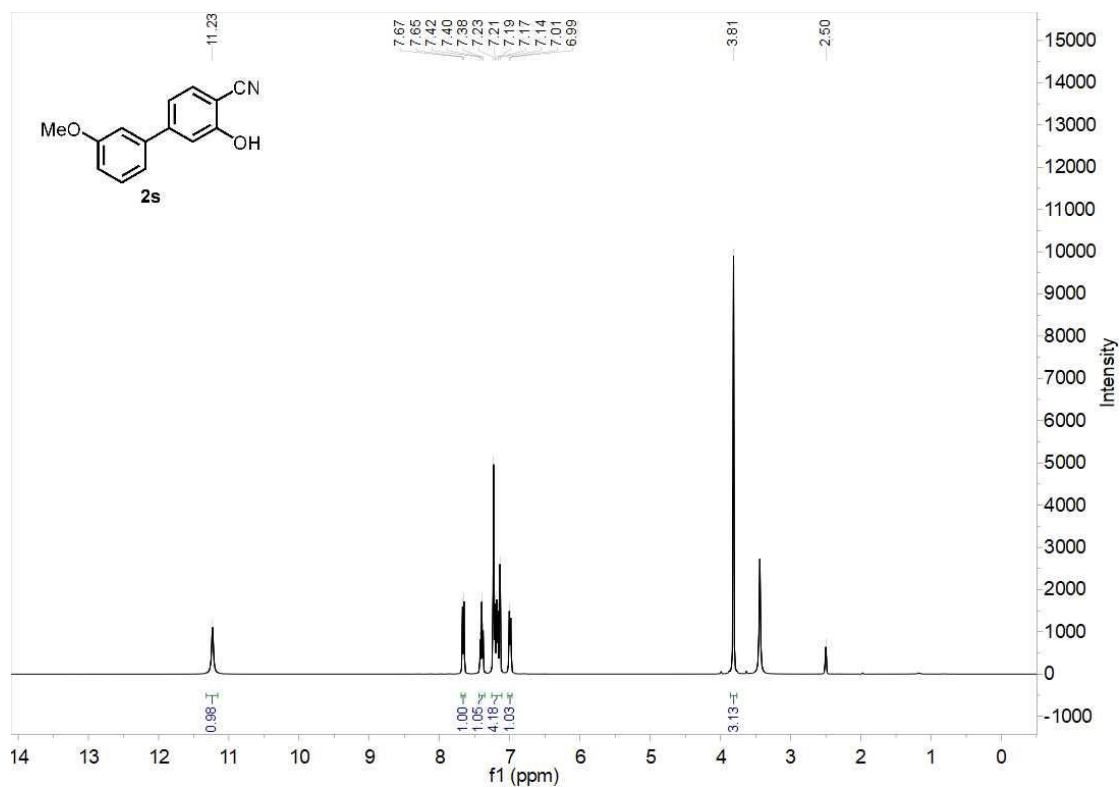

<sup>13</sup>C NMR spectrum of **2s** (100 MHz, DMSO-*d*<sub>6</sub>)

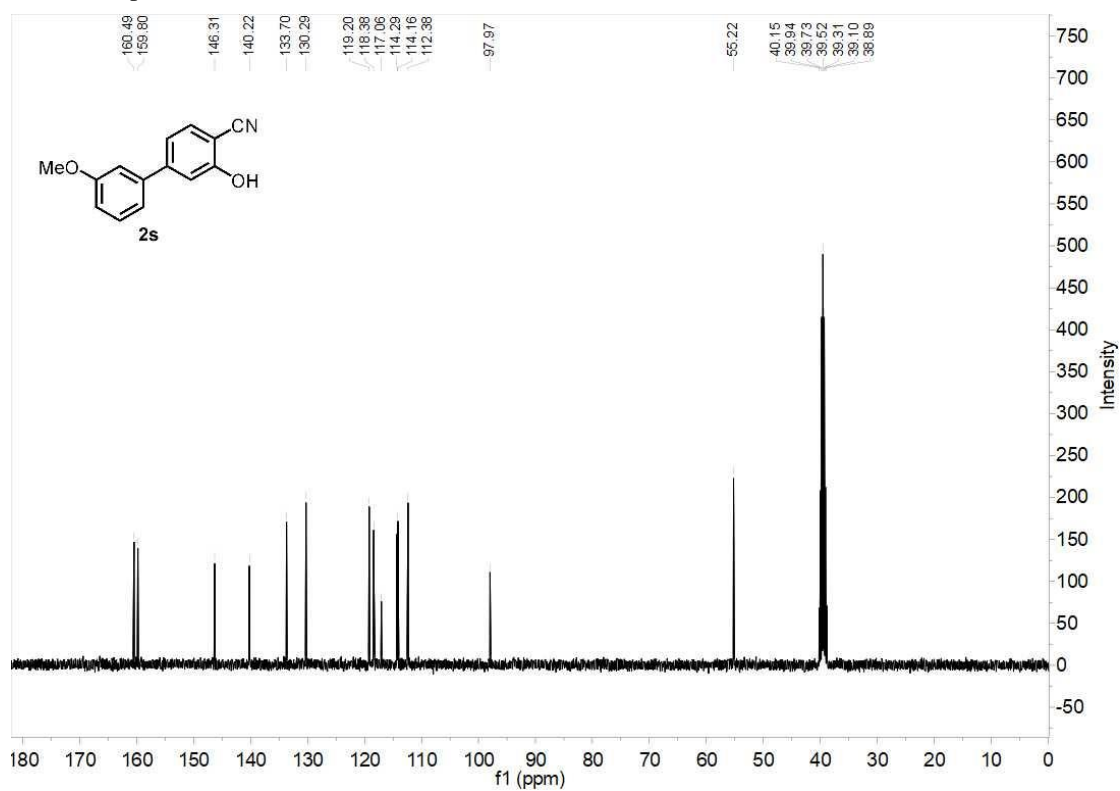

<sup>1</sup>H NMR spectrum of **2t** (400 MHz, DMSO-*d*<sub>6</sub>)

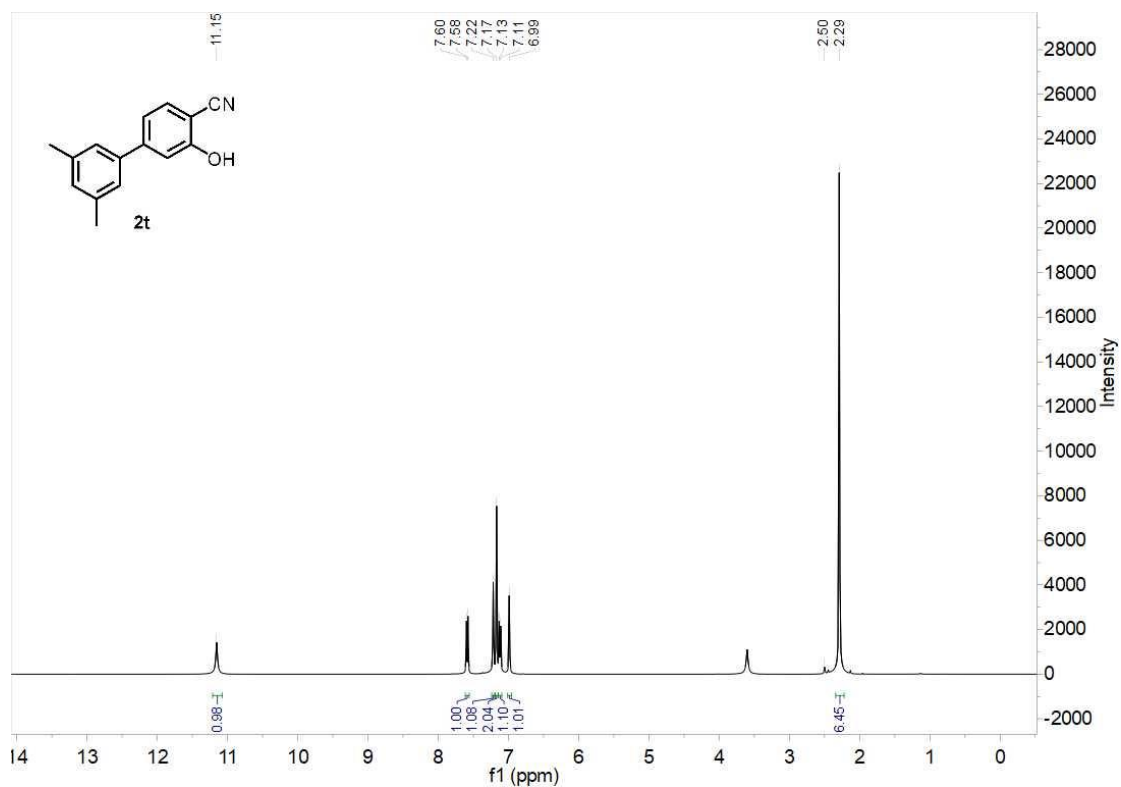

<sup>13</sup>C NMR spectrum of **2t** (100 MHz, DMSO-*d*<sub>6</sub>)

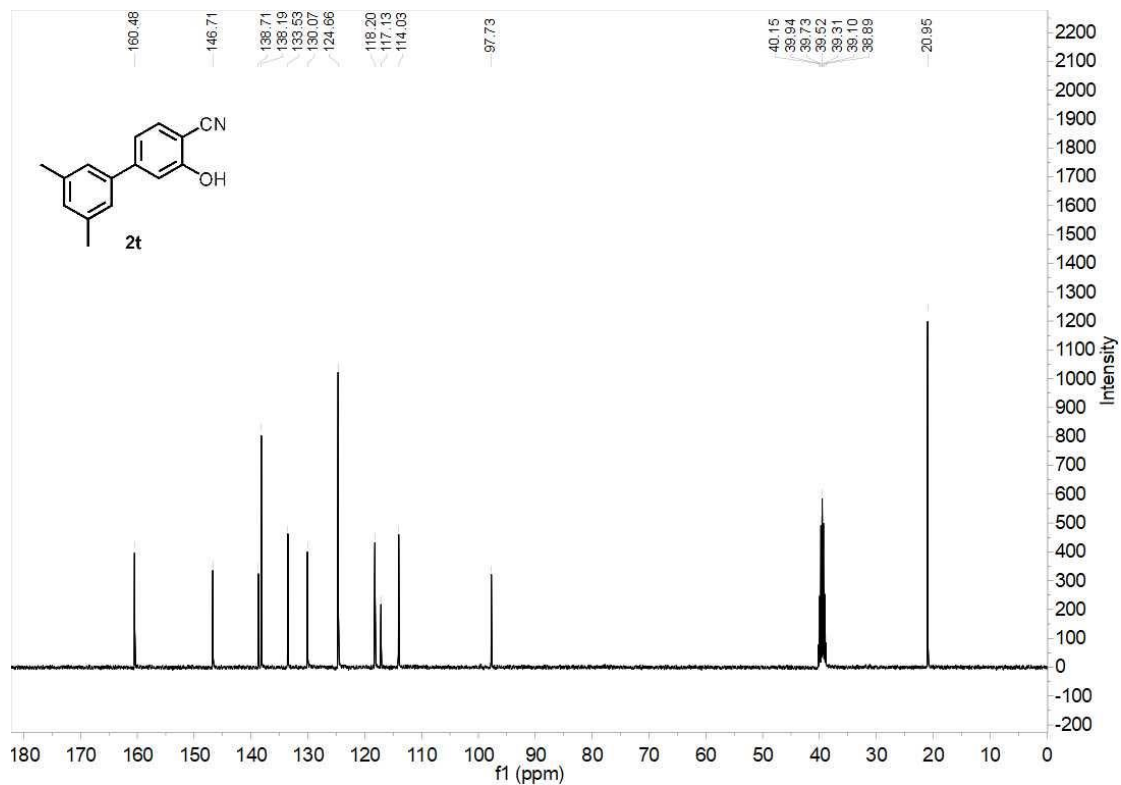

$^1\text{H}$  NMR spectrum of **2u** (400 MHz,  $\text{DMSO-}d_6$ )

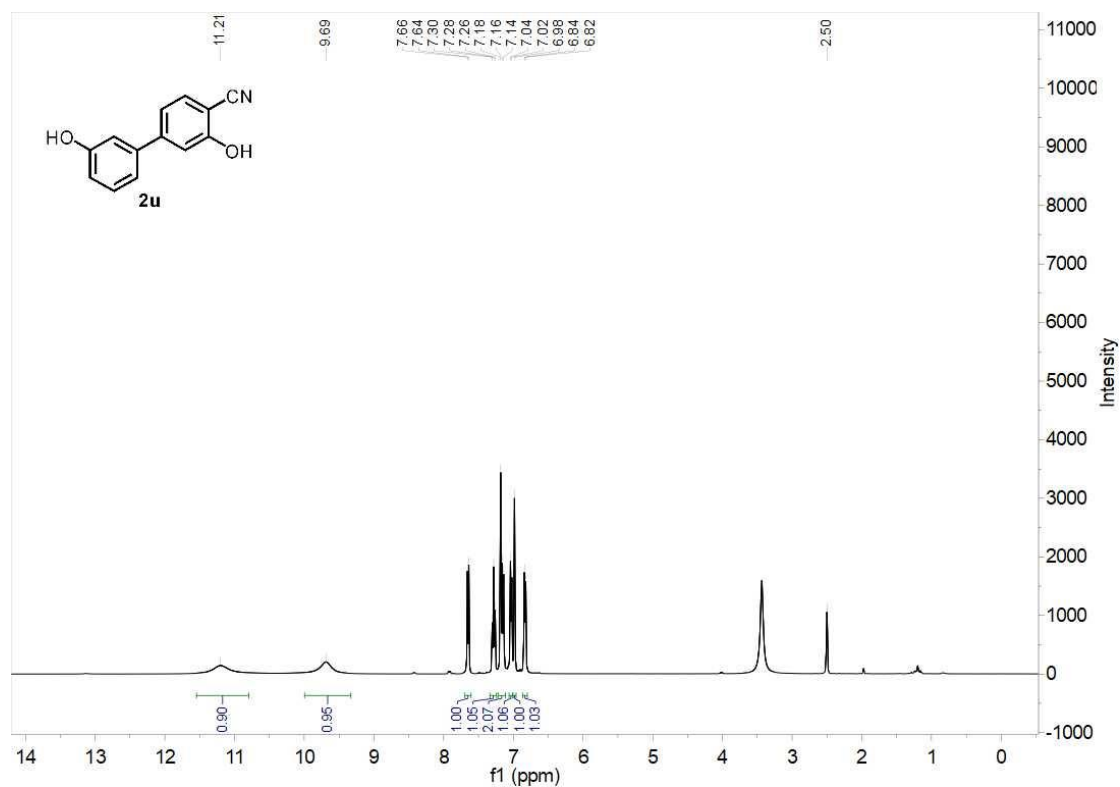

$^{13}\text{C}$  NMR spectrum of **2u** (100 MHz,  $\text{DMSO-}d_6$ )

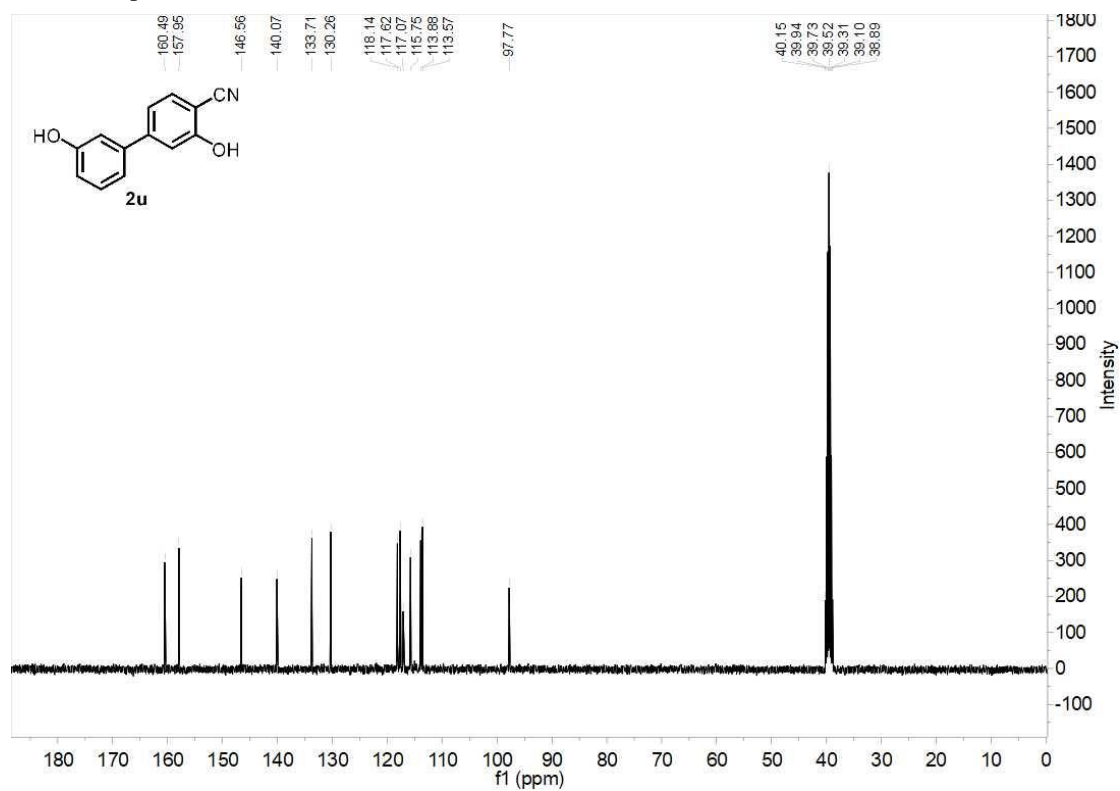



<sup>1</sup>H NMR spectrum of **2v** (400 MHz, DMSO-*d*<sub>6</sub>)

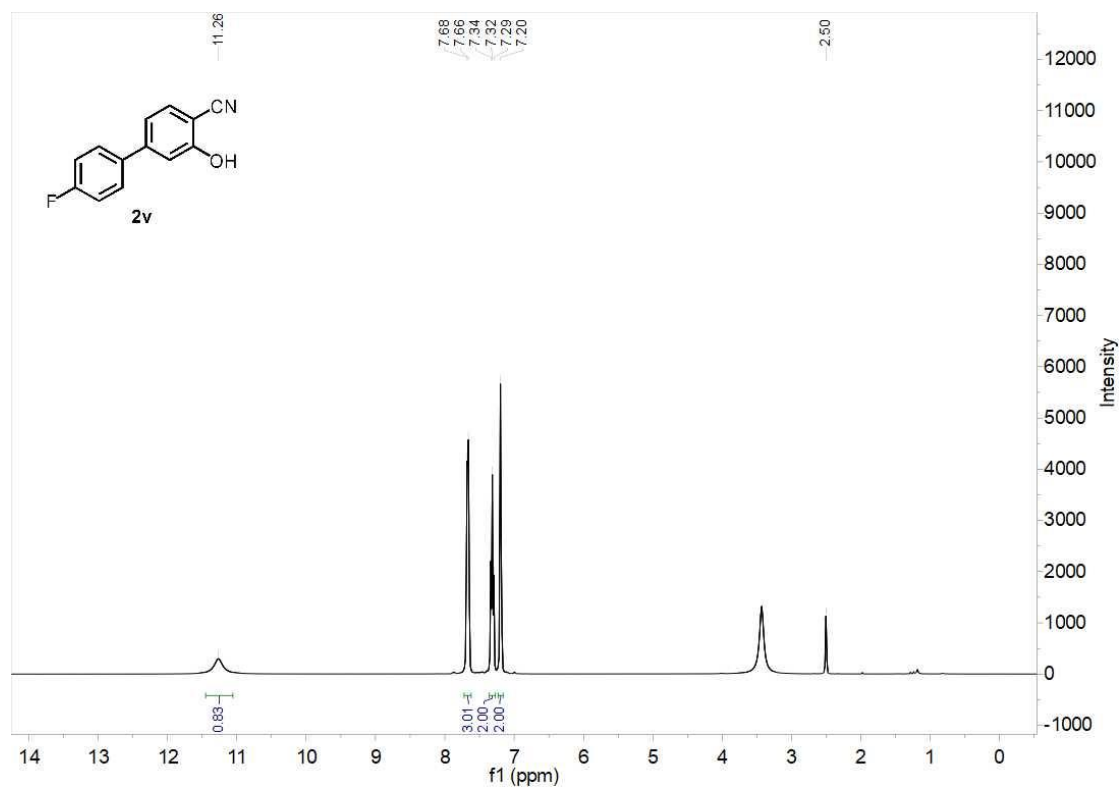

<sup>13</sup>C NMR spectrum of **2v** (100 MHz, DMSO-*d*<sub>6</sub>)

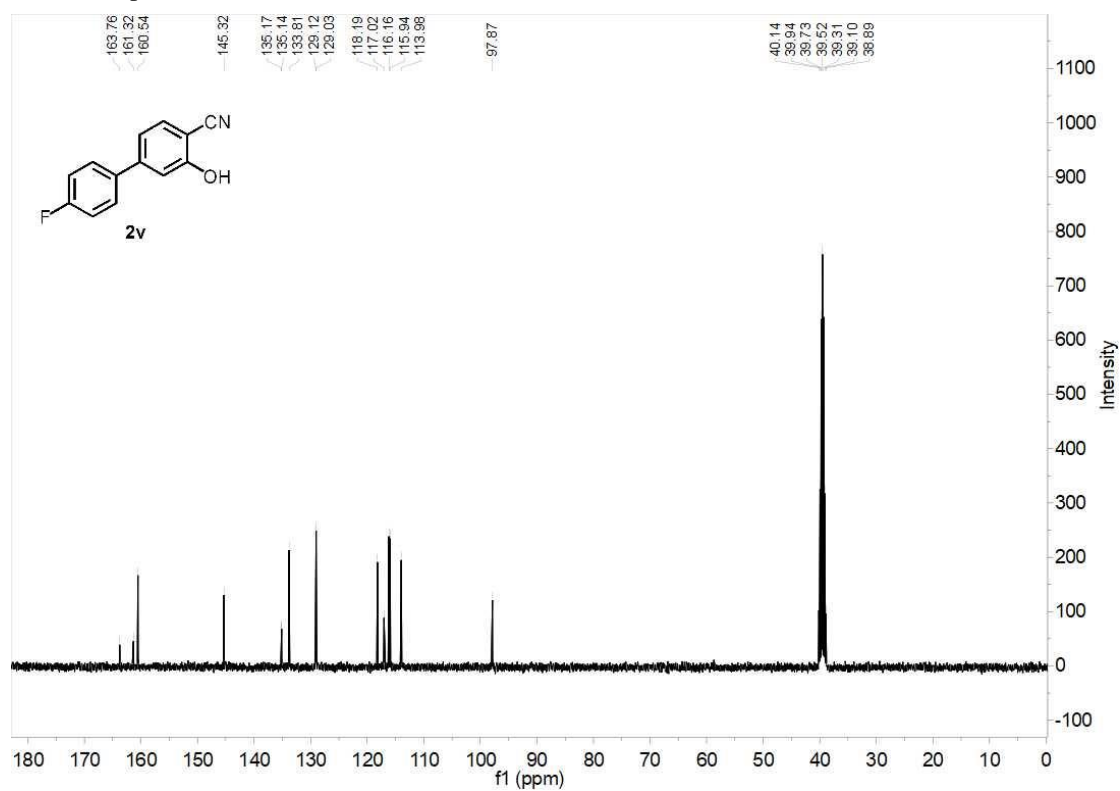

<sup>1</sup>H NMR spectrum of **2w** (400 MHz, DMSO-*d*<sub>6</sub>)

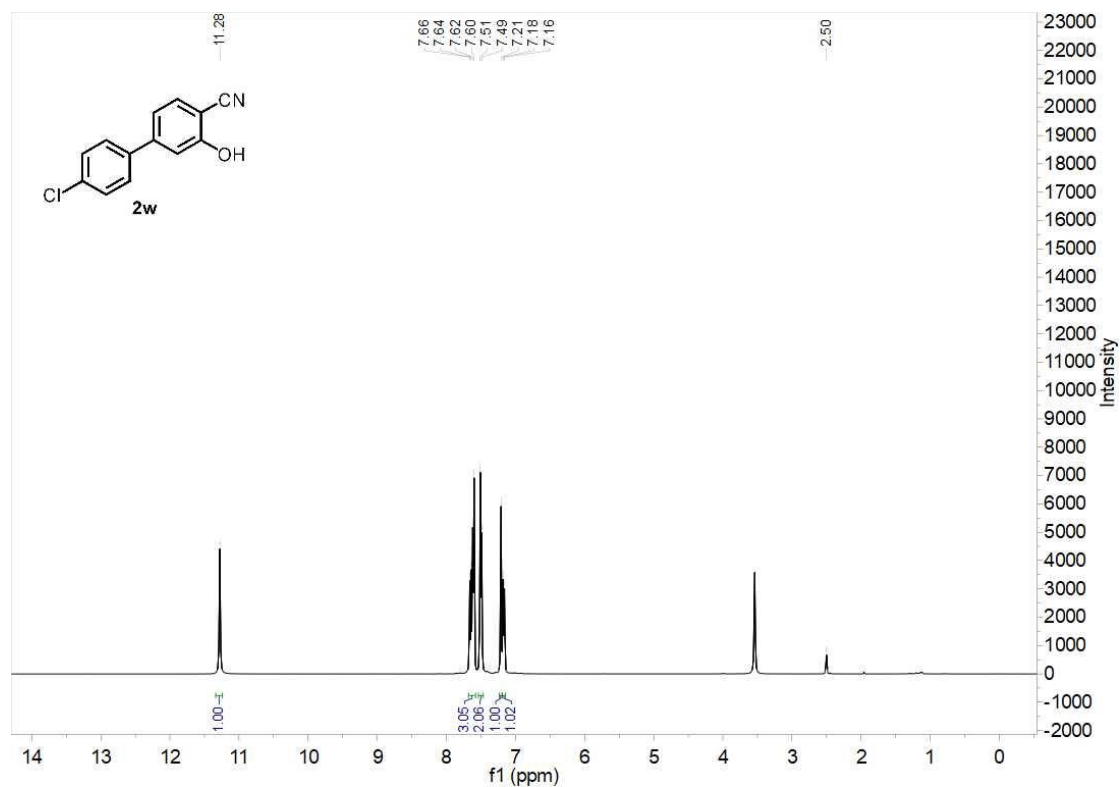

<sup>13</sup>C NMR spectrum of **2w** (100 MHz, DMSO-*d*<sub>6</sub>)

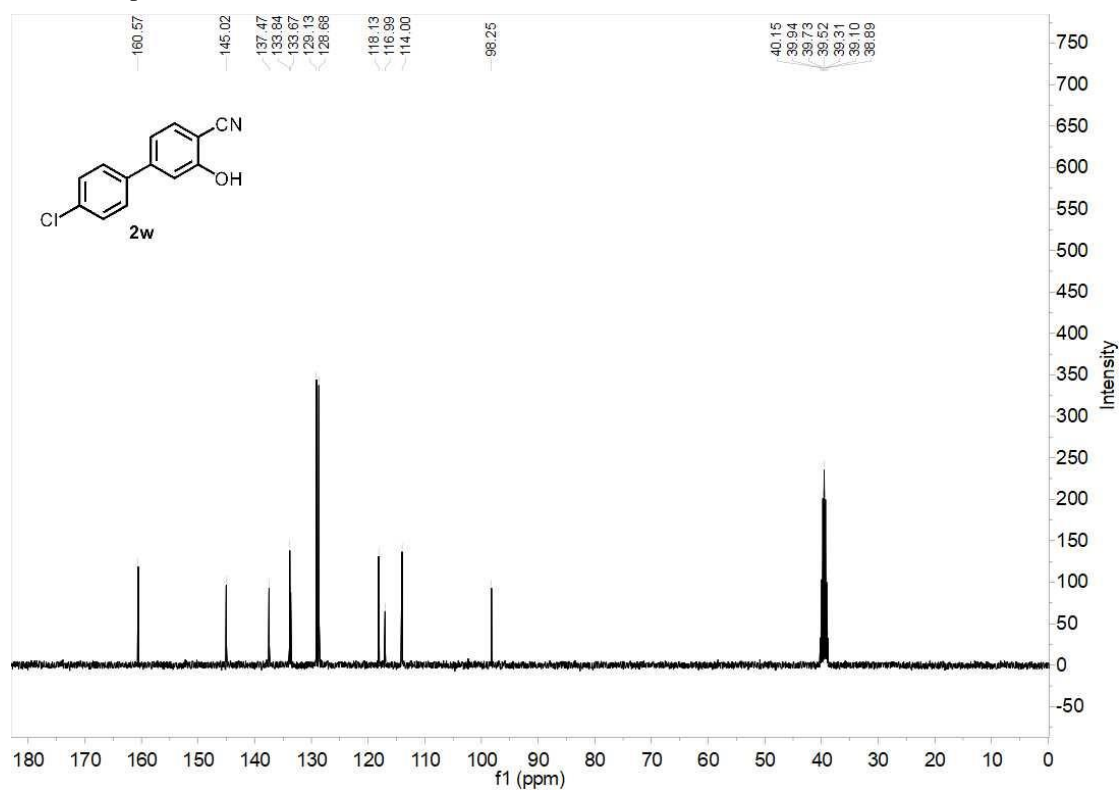

$^1\text{H}$  NMR spectrum of **2x** (400 MHz,  $\text{DMSO-}d_6$ )

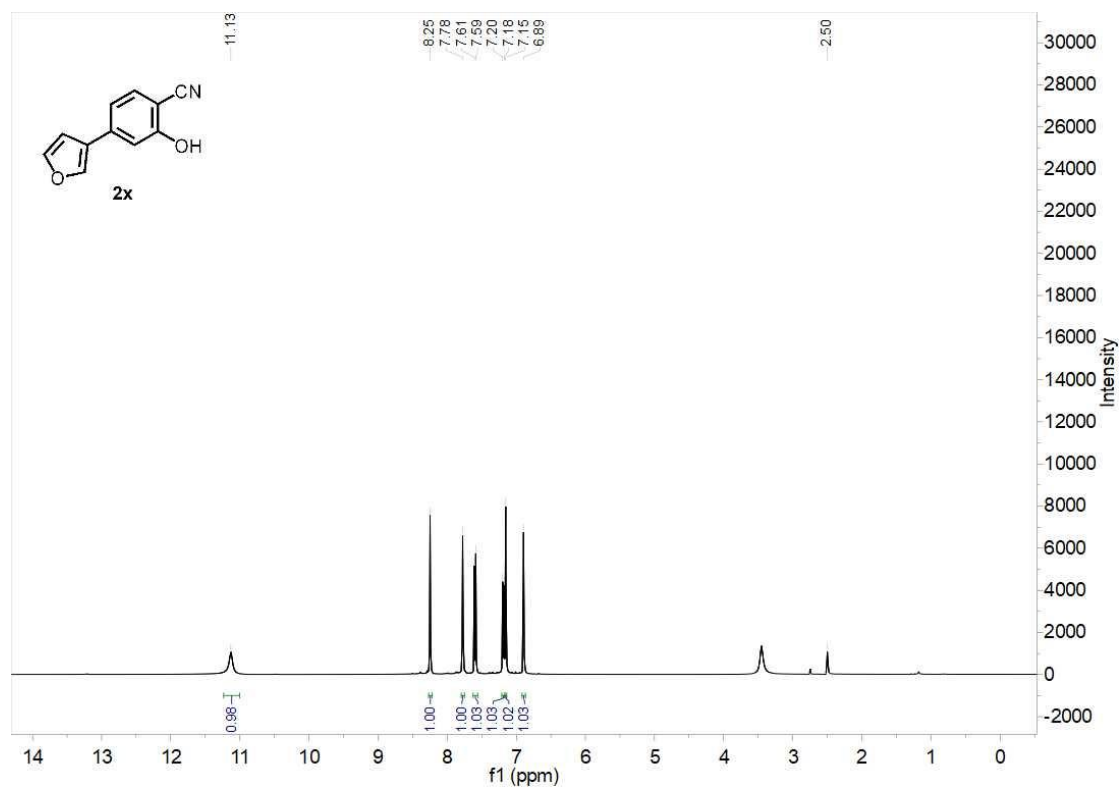

$^{13}\text{C}$  NMR spectrum of **2x** (100 MHz,  $\text{DMSO-}d_6$ )

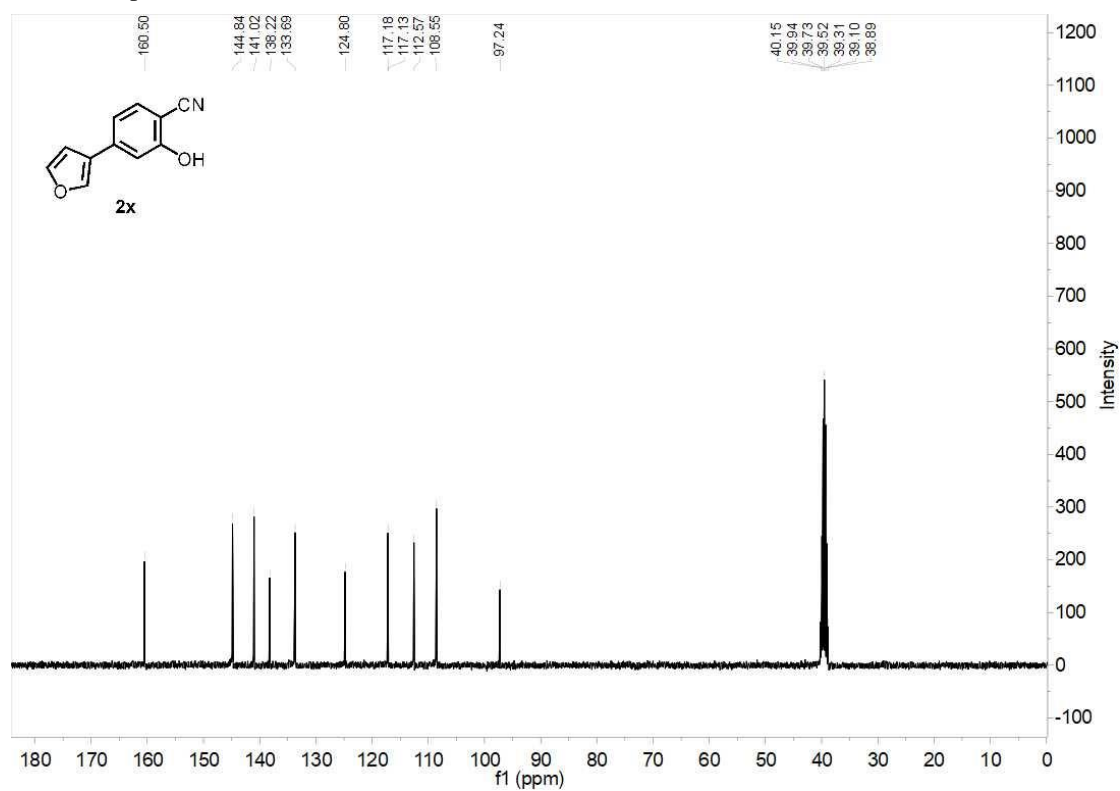

<sup>1</sup>H NMR spectrum of **2y** (400 MHz, DMSO-*d*<sub>6</sub>)

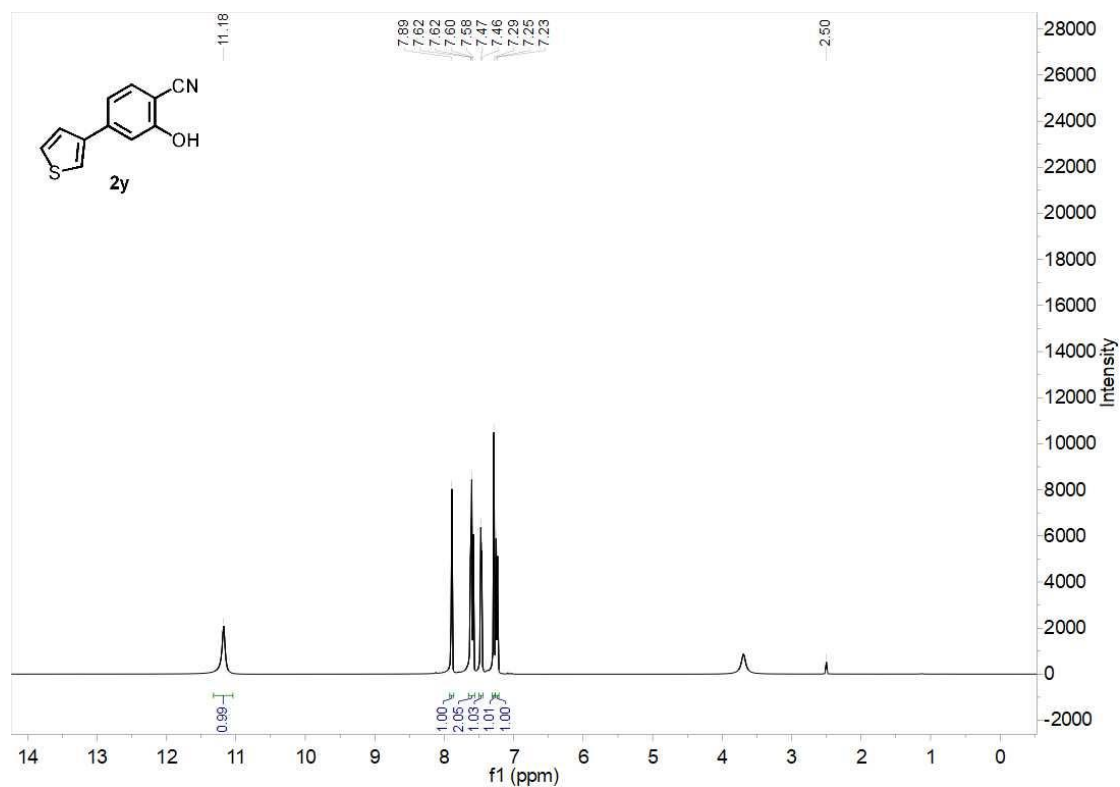

<sup>13</sup>C NMR spectrum of **2y** (100 MHz, DMSO-*d*<sub>6</sub>)

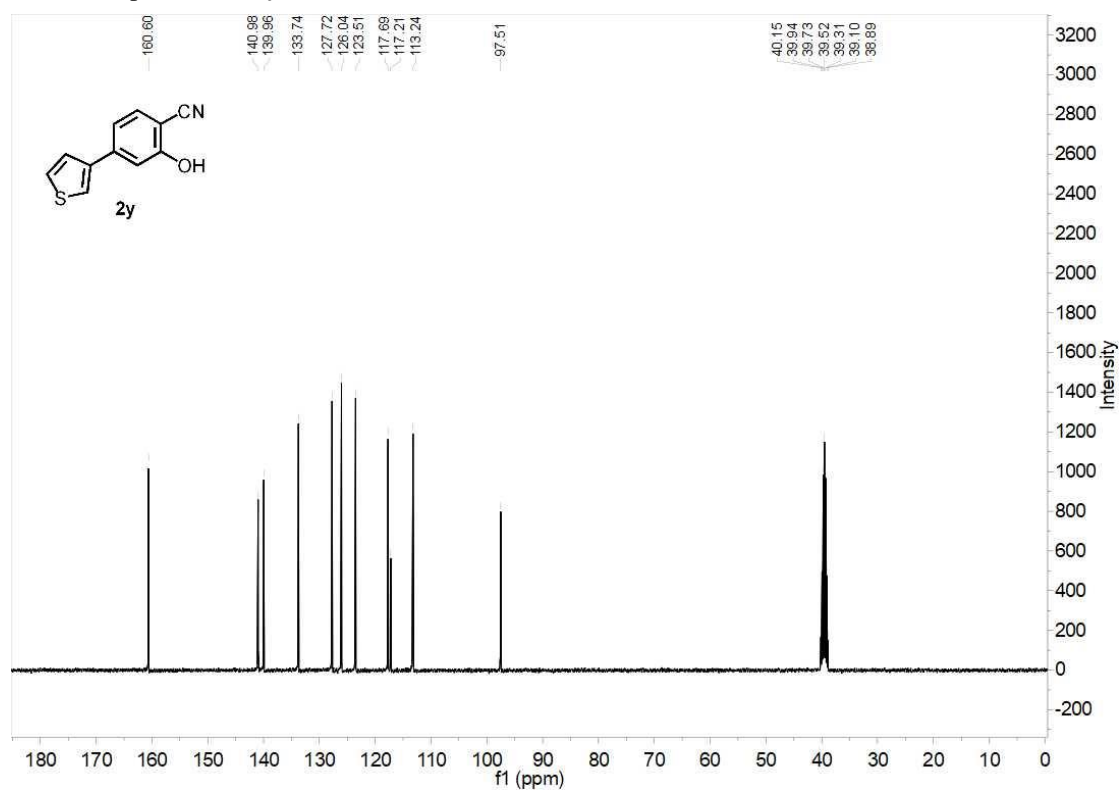

$^1\text{H}$  NMR spectrum of **2z** (400 MHz,  $\text{DMSO-}d_6$ )

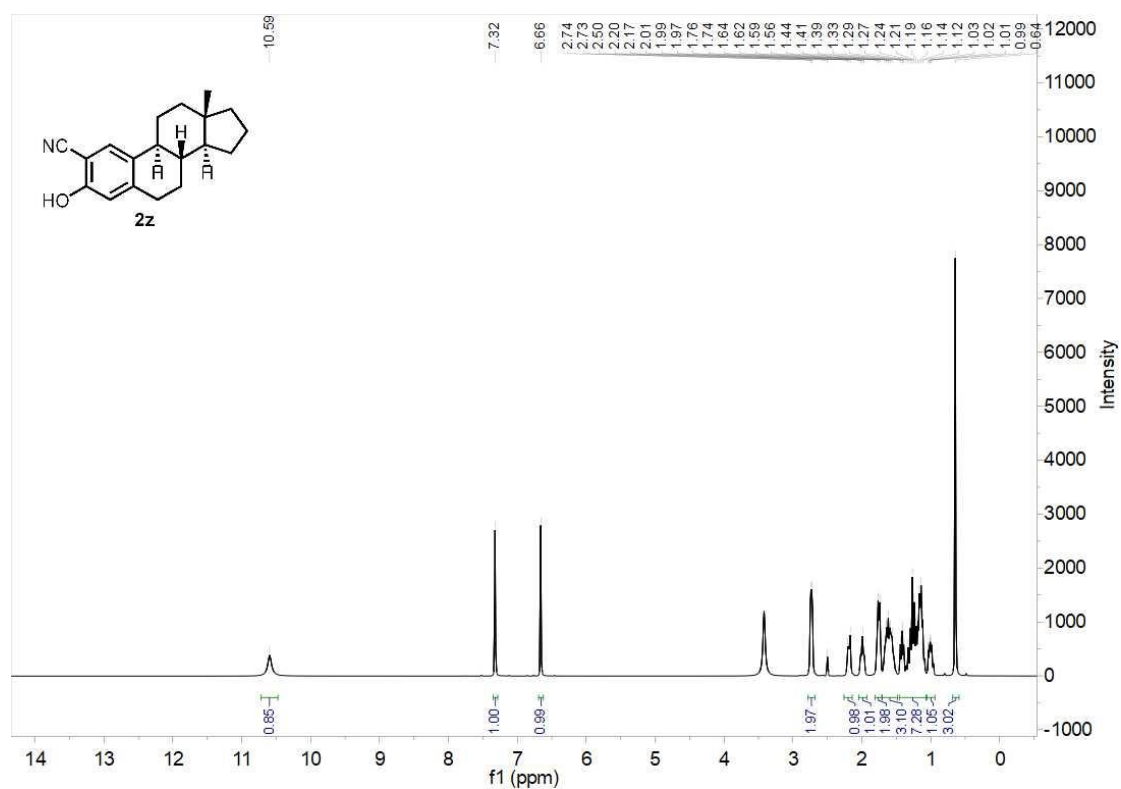

$^{13}\text{C}$  NMR spectrum of **2z** (100 MHz,  $\text{DMSO-}d_6$ )

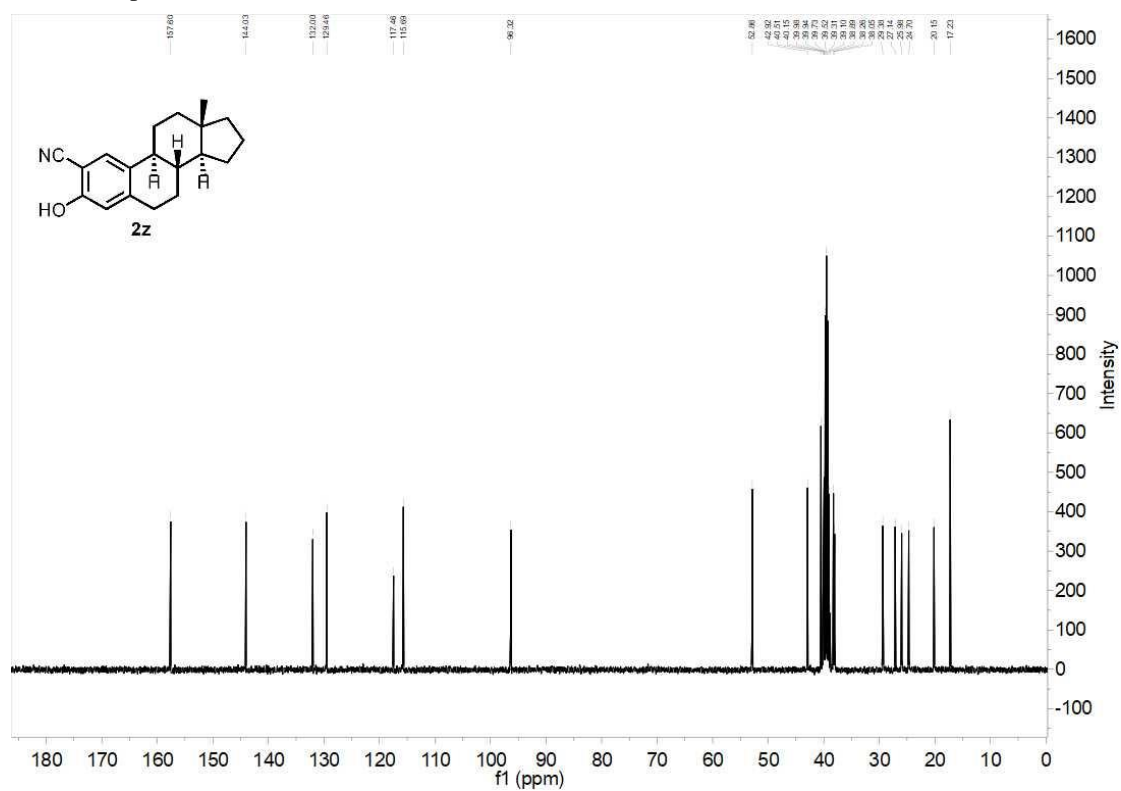

$^1\text{H}$  NMR spectrum of **2aa** (400 MHz,  $\text{DMSO-}d_6$ )

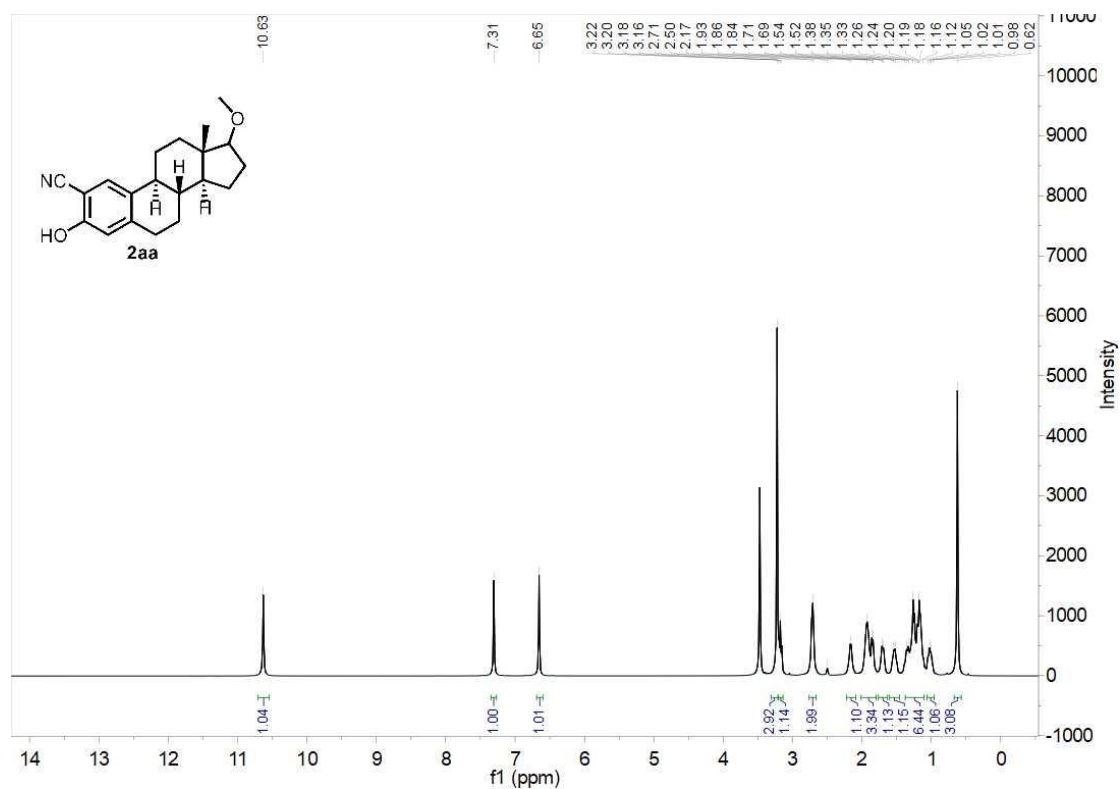

$^{13}\text{C}$  NMR spectrum of **2aa** (100 MHz,  $\text{DMSO-}d_6$ )

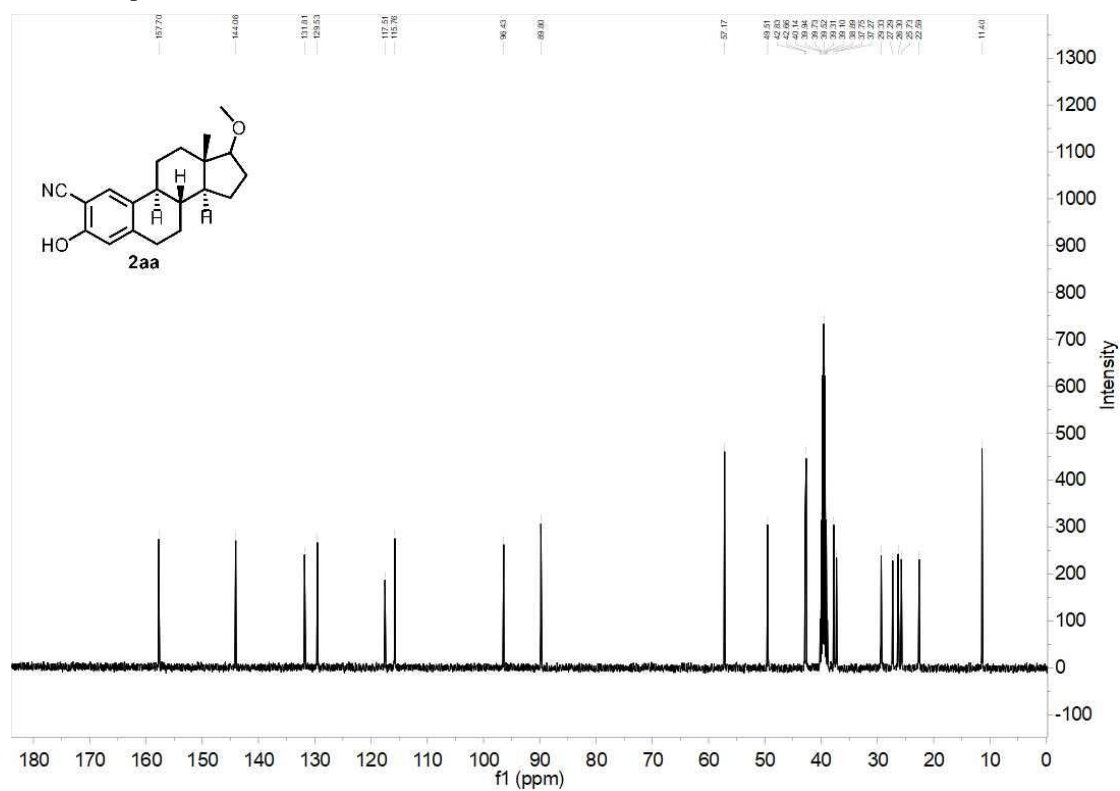

$^1\text{H}$  NMR spectrum of **3a** (400 MHz,  $\text{CDCl}_3$ )

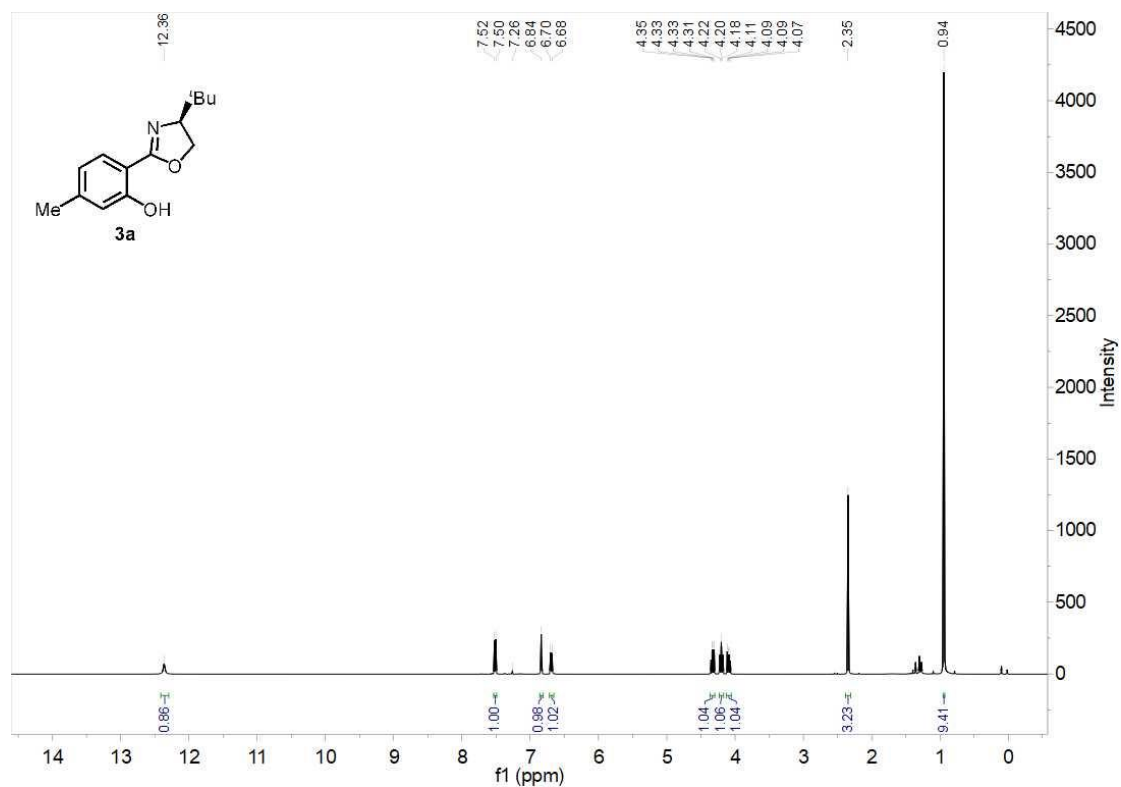

$^{13}\text{C}$  NMR spectrum of **3a** (100 MHz,  $\text{CDCl}_3$ )

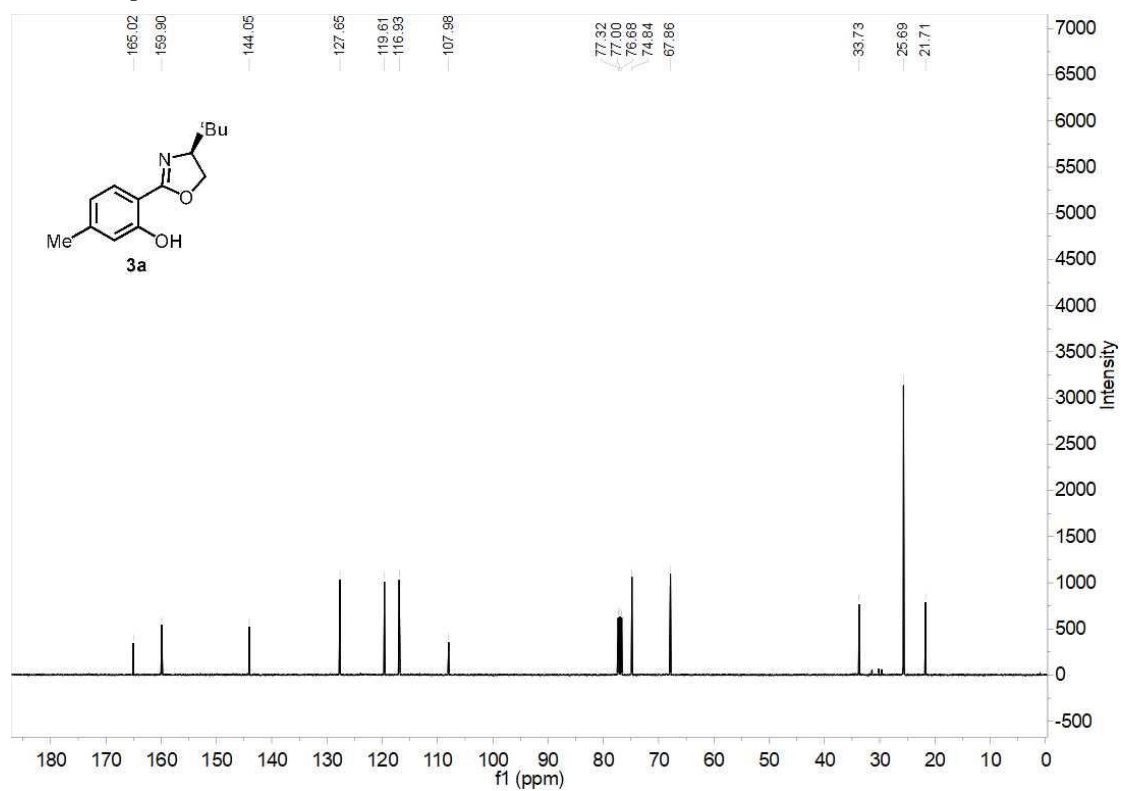

<sup>1</sup>H NMR spectrum of **3b** (400 MHz, CDCl<sub>3</sub>)

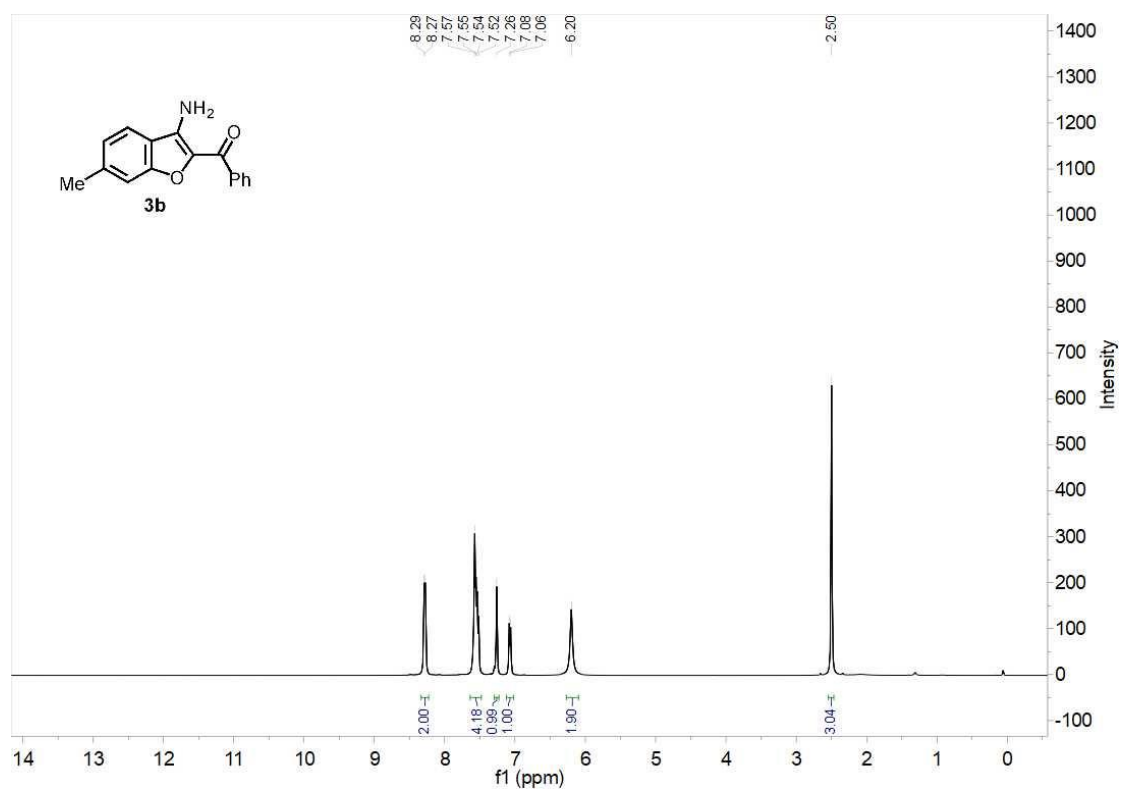

<sup>13</sup>C NMR spectrum of **3b** (100 MHz, CDCl<sub>3</sub>)

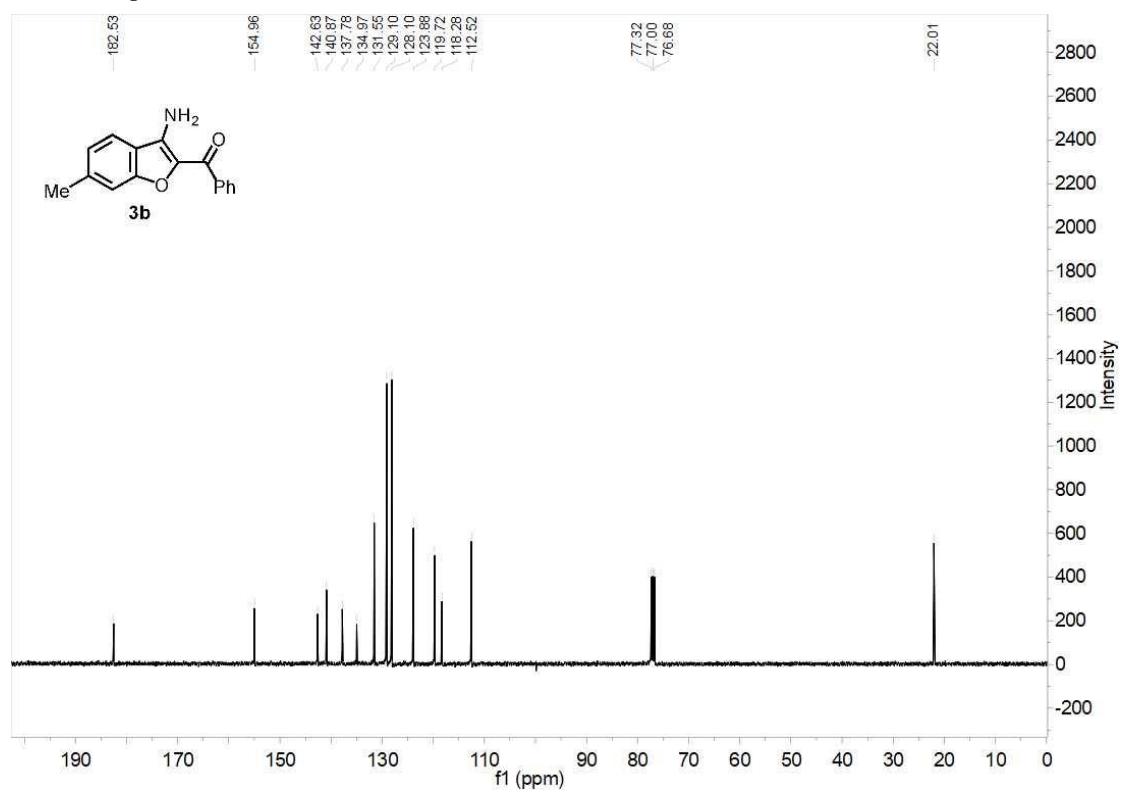



<sup>1</sup>H NMR spectrum of **3c** (400 MHz, CDCl<sub>3</sub>)

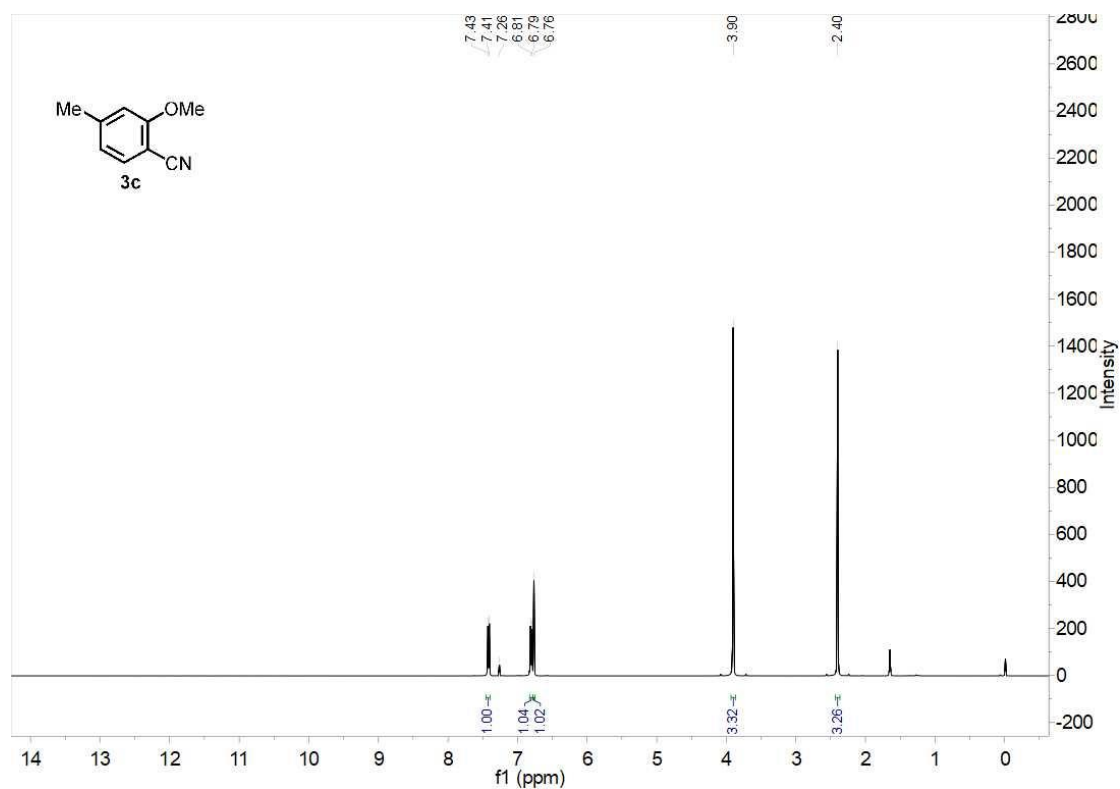

<sup>13</sup>C NMR spectrum of **3c** (100 MHz, CDCl<sub>3</sub>)

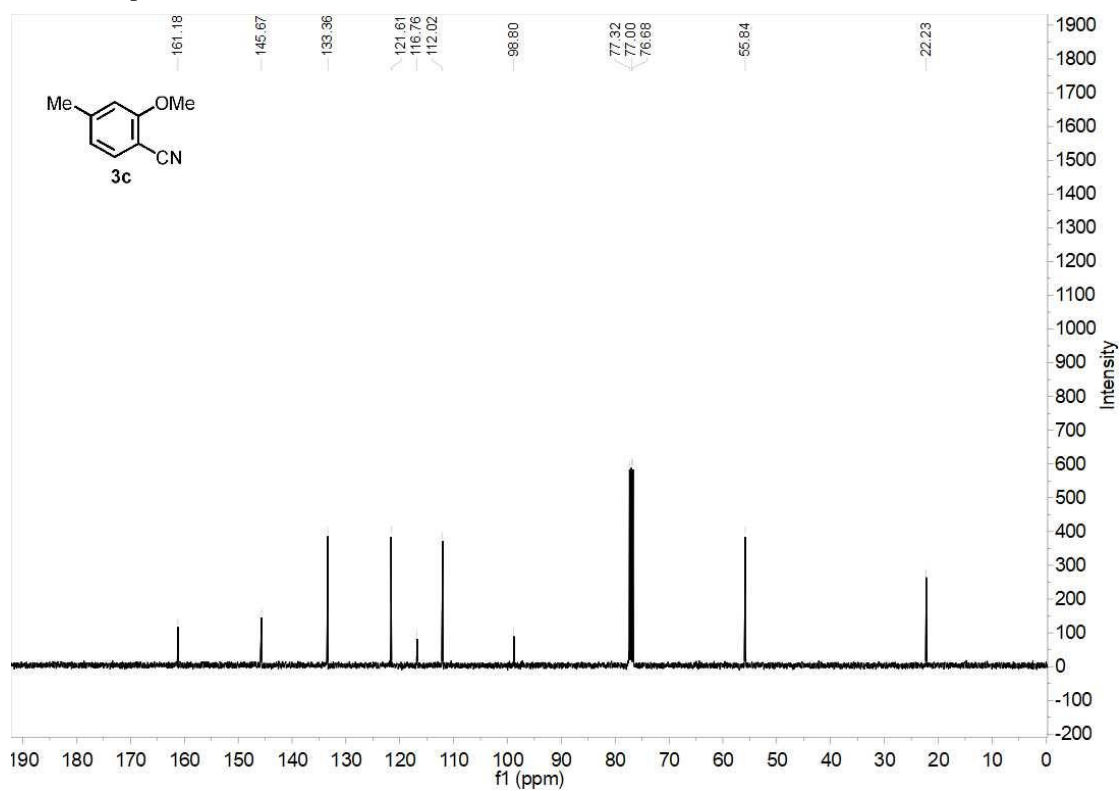

<sup>1</sup>H NMR spectrum of **3d** (400 MHz, CDCl<sub>3</sub>)

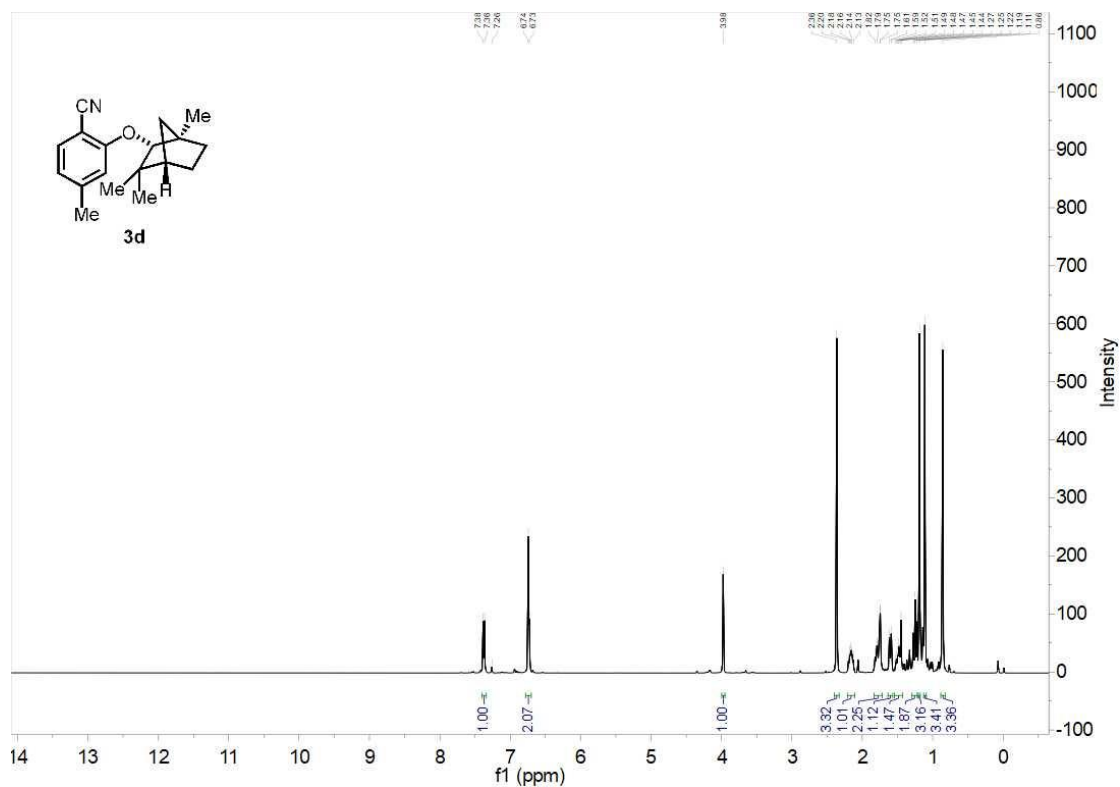

<sup>13</sup>C NMR spectrum of **3d** (100 MHz, CDCl<sub>3</sub>)

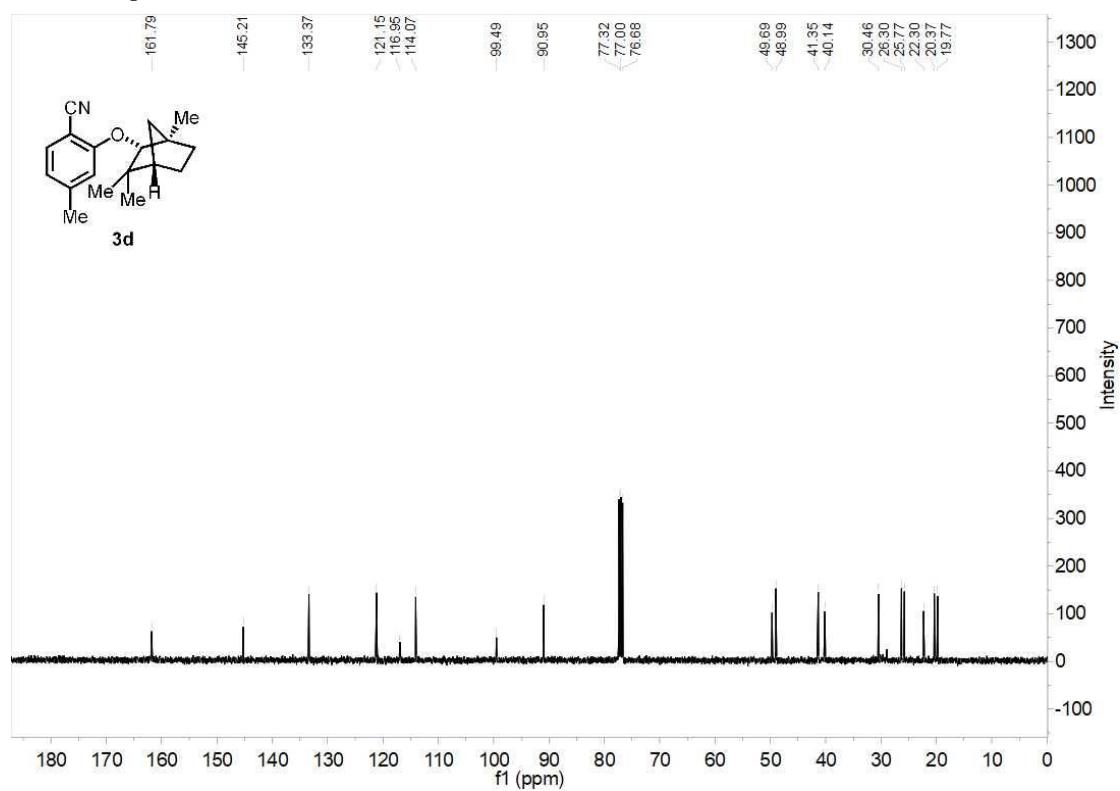

<sup>1</sup>H NMR spectrum of **3e** (400 MHz, DMSO-*d*<sub>6</sub>)

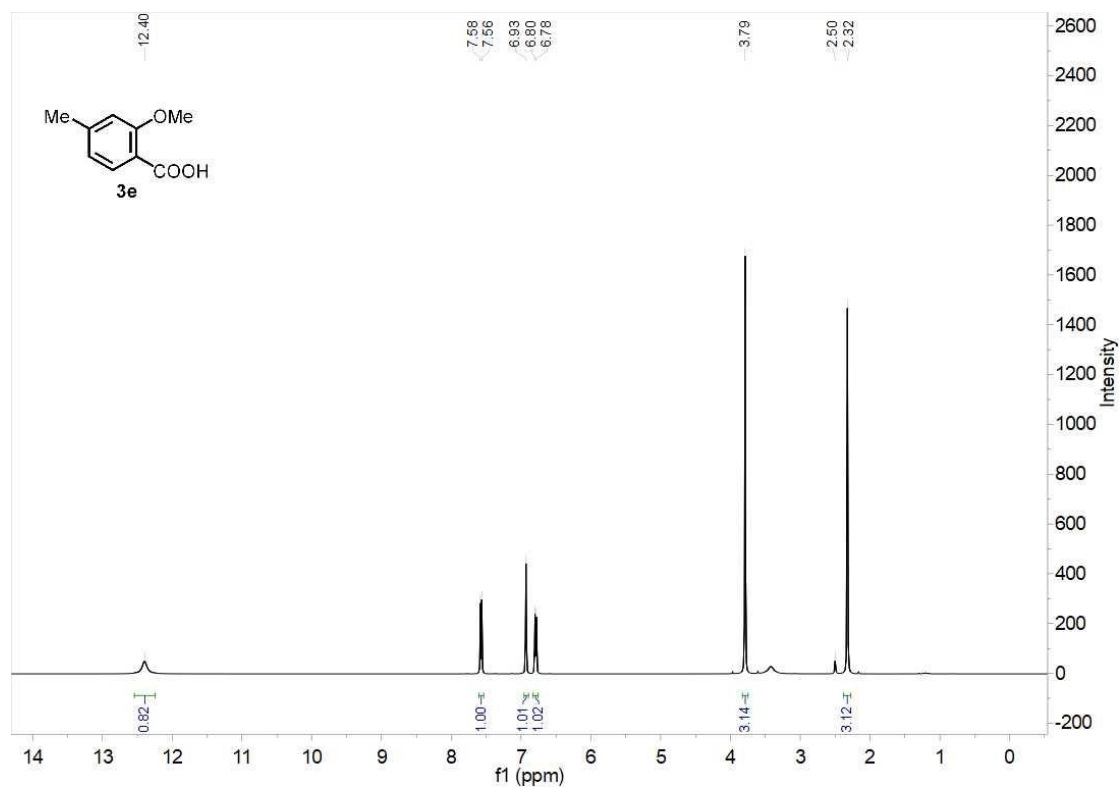

<sup>13</sup>C NMR spectrum of **3e** (100 MHz, DMSO-*d*<sub>6</sub>)

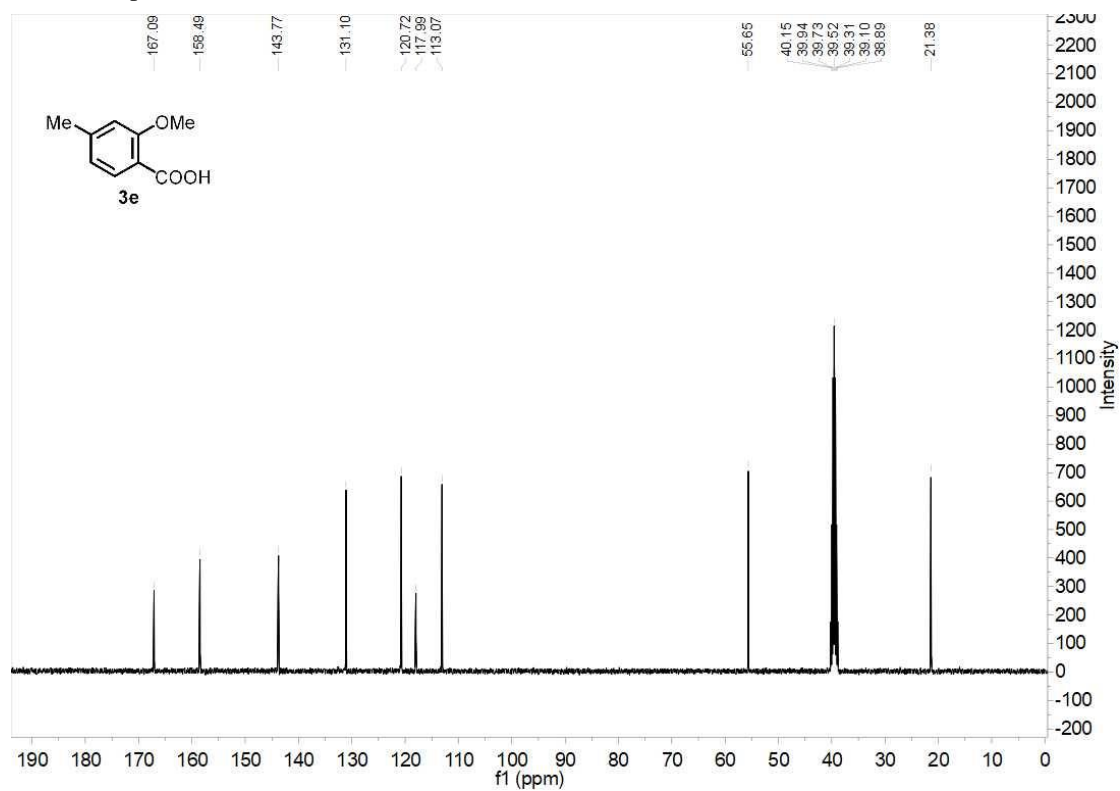

$^1\text{H}$  NMR spectrum of **3f** (400 MHz,  $\text{DMSO-}d_6$ )

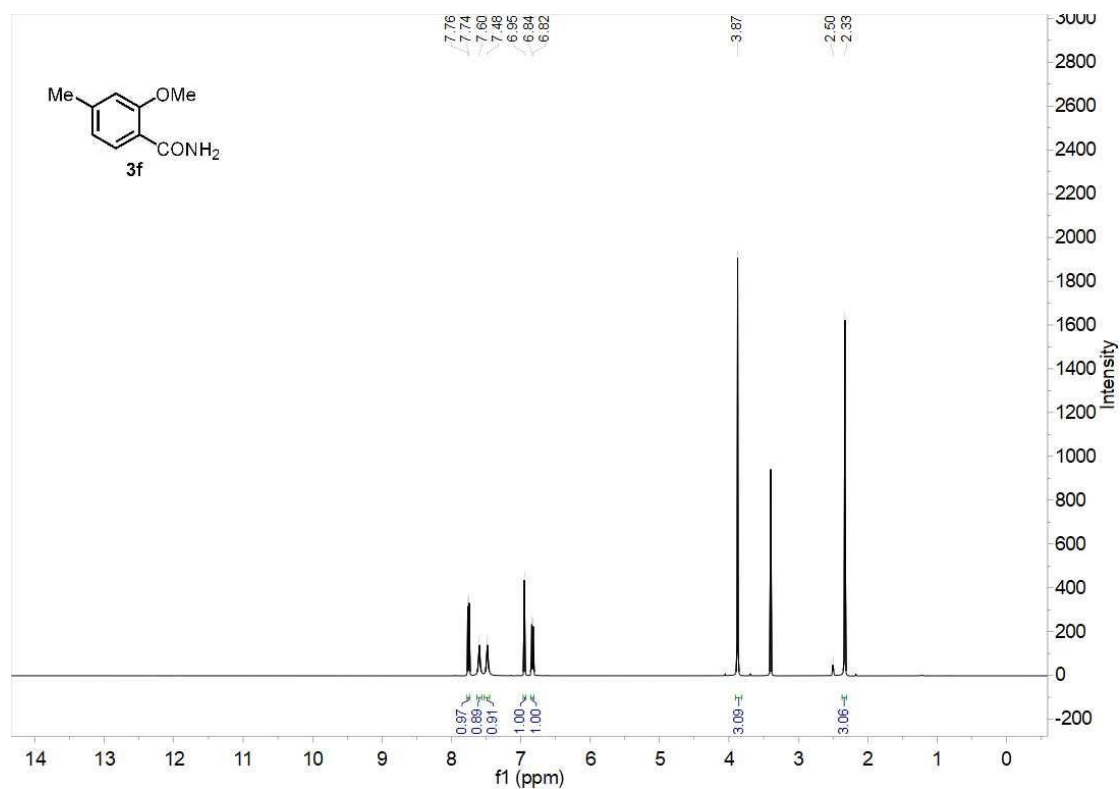

$^{13}\text{C}$  NMR spectrum of **3f** (100 MHz,  $\text{DMSO-}d_6$ )

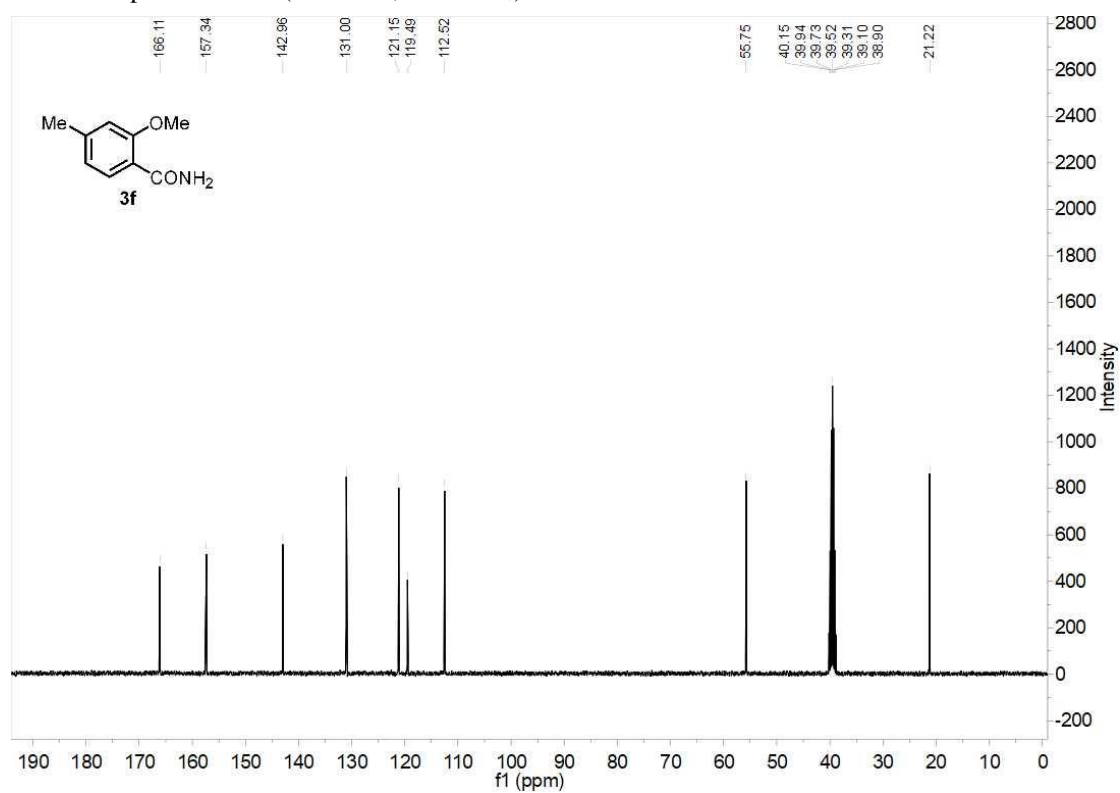

<sup>1</sup>H NMR spectrum of **3g** (400 MHz, CDCl<sub>3</sub>)

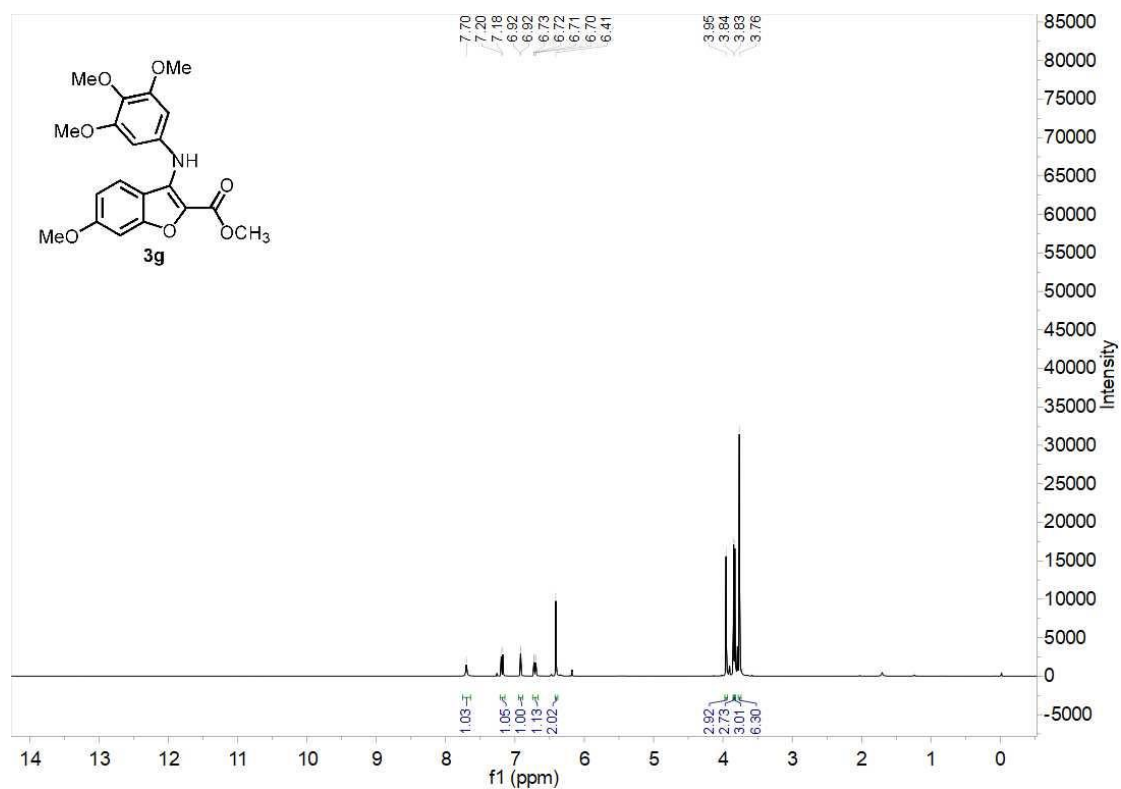

<sup>13</sup>C NMR spectrum of **3g** (100 MHz, CDCl<sub>3</sub>)

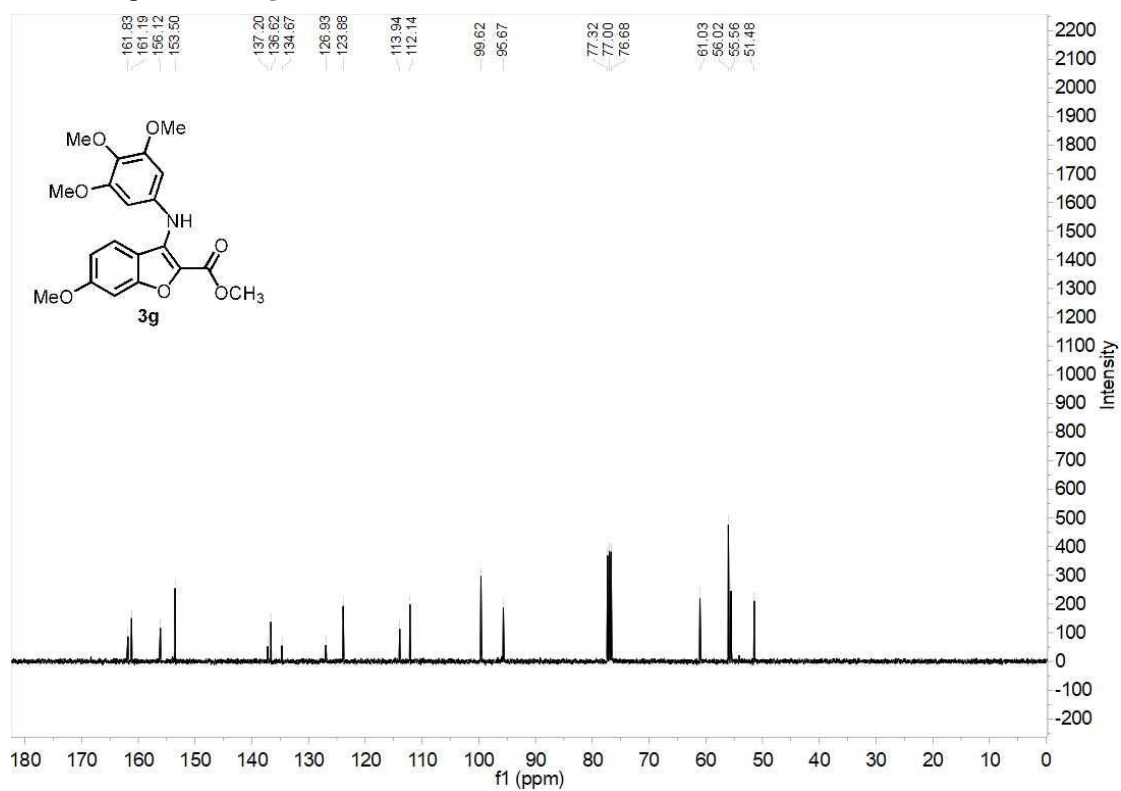

$^1\text{H}$  NMR spectrum of **4** (400 MHz,  $\text{DMSO-}d_6$ )

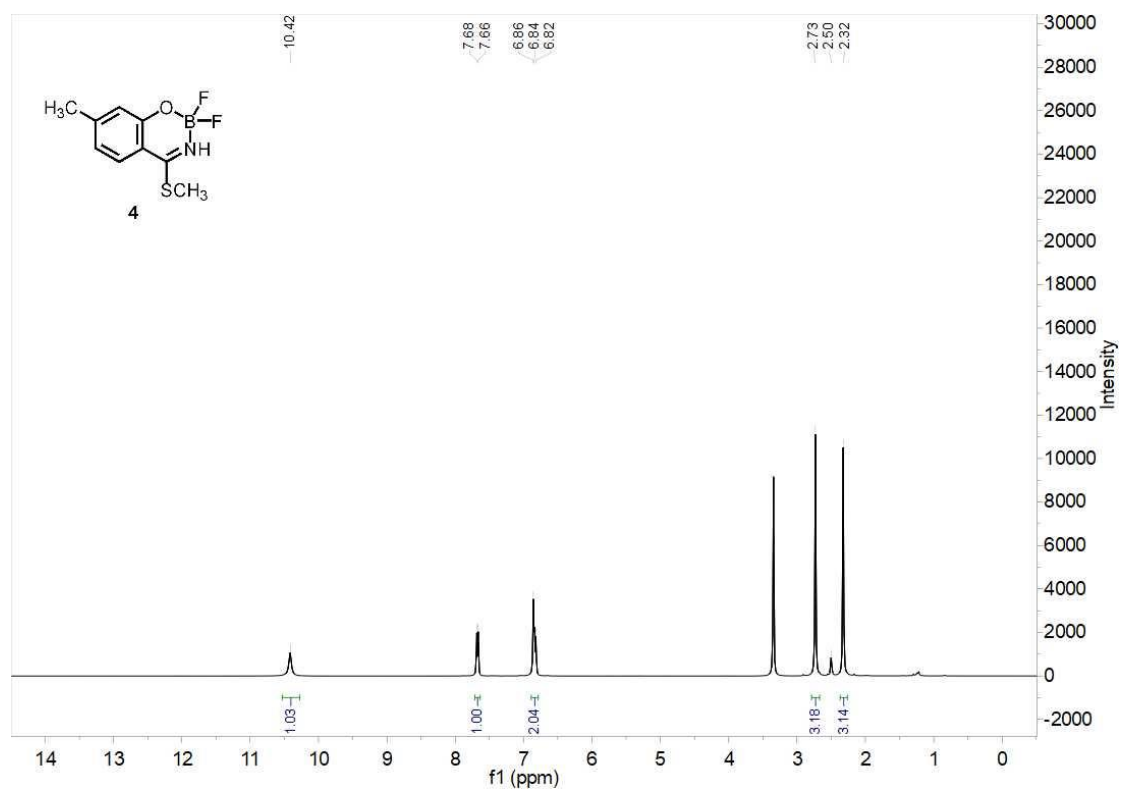

$^{19}\text{F}$  NMR spectrum of **4** (376 MHz,  $\text{DMSO-}d_6$ )

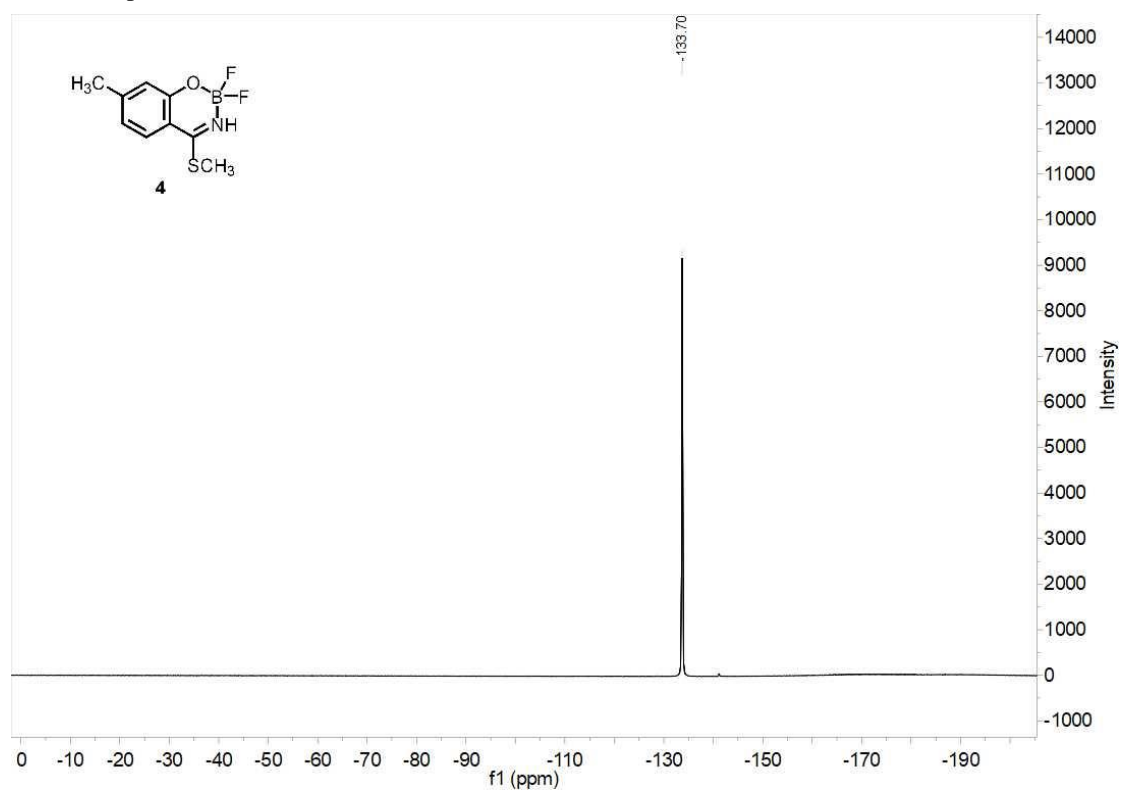

$^{13}\text{C}$  NMR spectrum of **4** (100 MHz,  $\text{DMSO-}d_6$ )

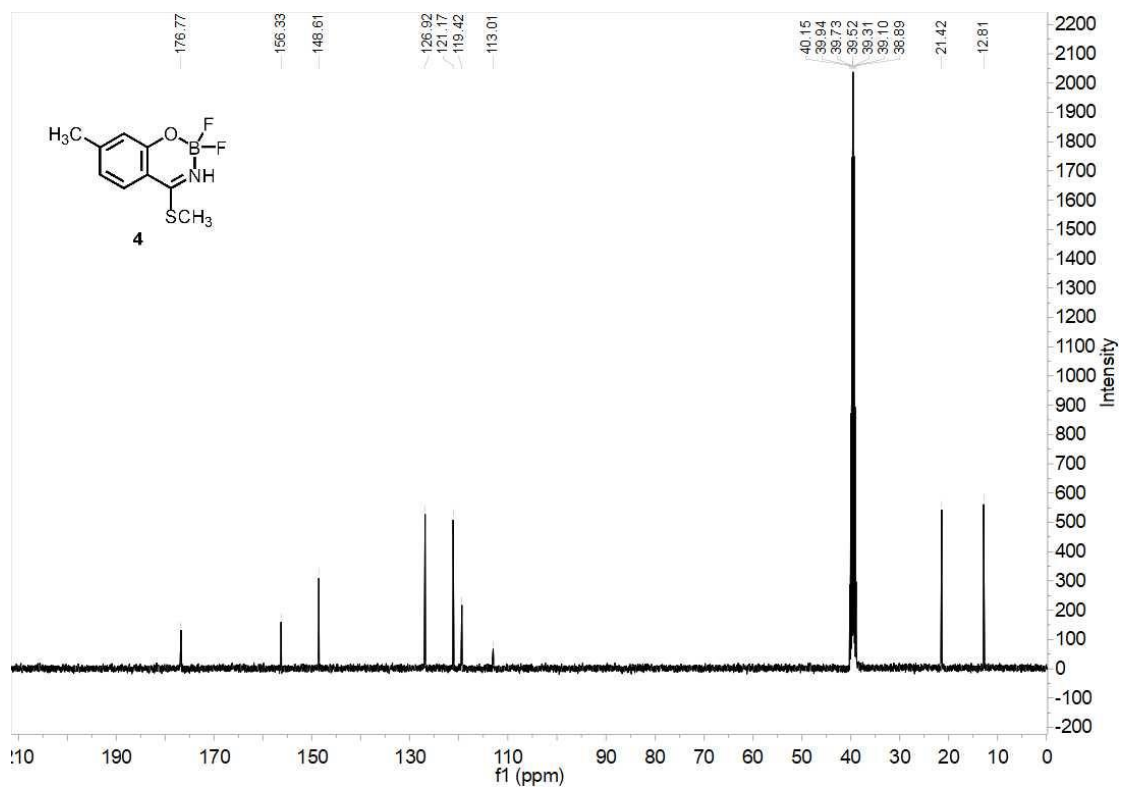

Supplement: d0ob00737d1.pdf [file d0ob00737d1.pdf]
